# Supplementary material for: Grind, shine and detect: mechanochemical synthesis of AIE-active polyaromatic amide and its application as molecular receptor of monovalent anions or nucleotides
Source: Royal Society of Chemistry journal article supplement (doi:10.1039/d4ra02129k), 2024-01-01
Supplement: d4ra02129k1.pdf [file d4ra02129k1.pdf]

## **Electronic Supplementary Information (ESI) for**

# **Grind, shine and detect: Mechanochemical synthesis of AIE-active polyaromatic amide and its application as molecular receptor of monovalent anions or nucleotides**

Jakub S. Cyniak<sup>a</sup>, Artur Kasprzak<sup>a\*</sup>

<sup>a</sup> Faculty of Chemistry, Warsaw University of Technology, Noakowskiego Str. 3, 00-664 Warsaw, Poland

\* Corresponding author e-mail: [artur.kasprzak@pw.edu.pl](mailto:artur.kasprzak@pw.edu.pl)

## Table of contents:

|                                                                   |    |
|-------------------------------------------------------------------|----|
| List of figures .....                                             | 3  |
| List of abbreviations: .....                                      | 5  |
| S1. Experimental section .....                                    | 6  |
| S1.1 Materials and methods.....                                   | 6  |
| S1.2 Synthesis of compound <b>3</b> – synthesis in solvent .....  | 7  |
| S1.3 Synthesis of compound <b>3</b> – mechanochemistry .....      | 8  |
| S1.4 Synthesis of compound <b>3</b> – sonochemistry .....         | 11 |
| S1.5 Green chemistry metrics .....                                | 12 |
| S1.6 Characterisation of aggregation induced emission effect..... | 17 |
| S1.7 Anion binding experiments .....                              | 17 |
| S1.7.1 Spectrofluorimetry .....                                   | 17 |
| S1.7.2 <sup>1</sup> H NMR spectroscopy .....                      | 17 |
| S1.9 Estimation of fluorescence quantum yield.....                | 17 |
| S2. NMR spectra.....                                              | 19 |
| S3 HRMS spectrum .....                                            | 21 |
| S4. Absorption and emission spectra .....                         | 22 |
| S5. Anions binding experiments .....                              | 26 |
| S5.1 Emission spectra.....                                        | 27 |
| S5.2 <sup>1</sup> H NMR spectroscopy .....                        | 27 |
| S7. DLS measurements .....                                        | 51 |
| S8 SEM images .....                                               | 53 |
| S9 Supporting references .....                                    | 54 |

## List of figures

|                    |                                                                                                                                                                                                                                            |    |
|--------------------|--------------------------------------------------------------------------------------------------------------------------------------------------------------------------------------------------------------------------------------------|----|
| <b>Figure S 1</b>  | $^1\text{H}$ NMR (500 MHz, DMSO- $d_6$ ) spectrum of <b>3</b> .....                                                                                                                                                                        | 19 |
| <b>Figure S 2</b>  | $\{^1\text{H}\}^{13}\text{C}$ NMR (125 MHz, DMSO- $d_6$ ) spectrum of <b>3</b> .....                                                                                                                                                       | 19 |
| <b>Figure S 3</b>  | $^1\text{H}$ - $^1\text{H}$ COSY NMR (500 MHz, DMSO- $d_6$ ) spectrum of <b>3</b> .....                                                                                                                                                    | 20 |
| <b>Figure S 4</b>  | ESI-HRMS (TOF) spectrum of <b>3</b> .....                                                                                                                                                                                                  | 21 |
| <b>Figure S 5</b>  | UV-vis spectrum of compound <b>3</b> (DMSO, $C_3 = 2 \cdot 10^{-5}$ M).....                                                                                                                                                                | 22 |
| <b>Figure S 6</b>  | Emission spectra of <b>3</b> (DMSO, $C_3 = 2 \cdot 10^{-5}$ M, $\lambda_{\text{ex}} = 270$ nm (top), $\lambda_{\text{ex}} = 340$ nm (bottom)) .....                                                                                        | 23 |
| <b>Figure S 7</b>  | 3D emission spectrum of <b>3</b> (DMSO, $C_3 = 2 \cdot 10^{-5}$ M) .....                                                                                                                                                                   | 24 |
| <b>Figure S 8</b>  | Emission spectra of compound <b>3</b> in DMSO/ $\text{H}_2\text{O}$ system containing different vol% of water in the sample ( $C_3 = 2 \cdot 10^{-5}$ M,).....                                                                             | 24 |
| <b>Figure S 9</b>  | Emission spectra ( $\lambda_{\text{ex}} = 270$ nm) of compound <b>3</b> in DMSO/ $\text{H}_2\text{O}$ system containing different vol% of water in the sample ( $C_3 = 2 \cdot 10^{-5}$ M).....                                            | 25 |
| <b>Figure S 10</b> | 3D emission spectra of <b>3</b> (DMSO/ $\text{H}_2\text{O} = 1:1$ v/v, $C_3 = 2 \cdot 10^{-5}$ M).....                                                                                                                                     | 25 |
| <b>Figure S 11</b> | Emission spectra ( $\lambda_{\text{ex}} = 340$ nm) of <b>3</b> in the presence of various molar equivalents of $\text{Br}^-$ (DMSO/ $\text{H}_2\text{O} 1:1$ v/v, $C_3 = 2 \cdot 10^{-5}$ M, $\lambda_{\text{ex}} = 270$ nm)......         | 33 |
| <b>Figure S 12</b> | Stern-Volmer plot regarding the interactions between <b>3</b> and $\text{Br}^-$ . The data for the linear plot are also presented.....                                                                                                     | 34 |
| <b>Figure S 13</b> | Plot for $(I-I_{\text{min}})/(I_{\text{max}}-I_{\text{min}})$ versus $\log(C_{\text{Br}^-})$ regarding the interactions between <b>3</b> and $\text{Br}^-$ . The data for the linear plot are also presented.....                          | 34 |
| <b>Figure S 14</b> | Emission spectra of <b>3</b> in the presence of various molar equivalents of $\text{I}^-$ (DMSO/ $\text{H}_2\text{O} 1:1$ v/v, $C_3 = 2 \cdot 10^{-5}$ M, $\lambda_{\text{ex}} = 270$ nm). .....                                           | 35 |
| <b>Figure S 15</b> | Stern-Volmer plot regarding the interactions between <b>3</b> and $\text{I}^-$ . The data for the linear plot are also presented.....                                                                                                      | 35 |
| <b>Figure S 16</b> | Plot for $(I-I_{\text{min}})/(I_{\text{max}}-I_{\text{min}})$ versus $\log(C_{\text{I}^-})$ regarding the interactions between <b>3</b> and $\text{I}^-$ . The data for the linear plot are also presented.....                            | 36 |
| <b>Figure S 17</b> | Emission spectra of <b>3</b> in the presence of various molar equivalents of $\text{HSO}_4^-$ (DMSO/ $\text{H}_2\text{O} 1:1$ v/v, $C_3 = 2 \cdot 10^{-5}$ M, $\lambda_{\text{ex}} = 270$ nm). .....                                       | 36 |
| <b>Figure S 18</b> | Stern-Volmer plot regarding the interactions between <b>3</b> and $\text{HSO}_4^-$ . The data for the linear plot are also presented. ....                                                                                                 | 37 |
| <b>Figure S 19</b> | Plot for $(I-I_{\text{min}})/(I_{\text{max}}-I_{\text{min}})$ versus $\log(C_{\text{HSO}_4^-})$ regarding the interactions between <b>3</b> and $\text{HSO}_4^-$ . The data for the linear plot are also presented. ....                   | 37 |
| <b>Figure S 20</b> | Emission spectra of <b>3</b> in the presence of various molar equivalents of $\text{BF}_4^-$ (DMSO/ $\text{H}_2\text{O} 1:1$ v/v, $C_3 = 2 \cdot 10^{-5}$ M, $\lambda_{\text{ex}} = 270$ nm). .....                                        | 38 |
| <b>Figure S 21</b> | Stern-Volmer plot regarding the interactions between <b>3</b> and $\text{BF}_4^-$ . The data for the linear plot are also presented. ....                                                                                                  | 38 |
| <b>Figure S 22</b> | Plot for $(I-I_{\text{min}})/(I_{\text{max}}-I_{\text{min}})$ versus $\log(C_{\text{BF}_4^-})$ regarding the interactions between <b>3</b> and $\text{BF}_4^-$ . The data for the linear plot are also presented. ....                     | 39 |
| <b>Figure S 23</b> | Emission spectra of <b>3</b> in the presence of various molar equivalents of $\text{H}_2\text{PO}_4^-$ (DMSO/ $\text{H}_2\text{O} 1:1$ v/v, $C_3 = 2 \cdot 10^{-5}$ M, $\lambda_{\text{ex}} = 270$ nm). .....                              | 39 |
| <b>Figure S 24</b> | Stern-Volmer plot regarding the interactions between <b>3</b> and $\text{H}_2\text{PO}_4^-$ . The data for the linear plot are also presented. ....                                                                                        | 40 |
| <b>Figure S 25</b> | Plot for $(I-I_{\text{min}})/(I_{\text{max}}-I_{\text{min}})$ versus $\log(C_{\text{H}_2\text{PO}_4^-})$ regarding the interactions between <b>3</b> and $\text{H}_2\text{PO}_4^-$ . The data for the linear plot are also presented. .... | 40 |
| <b>Figure S 26</b> | Emission spectra of <b>3</b> in the presence of various molar equivalents of $\text{ClO}_4^-$ (DMSO/ $\text{H}_2\text{O} 1:1$ v/v, $C_3 = 2 \cdot 10^{-5}$ M, $\lambda_{\text{ex}} = 270$ nm). .....                                       | 41 |

|                    |                                                                                                                                                                                                                 |    |
|--------------------|-----------------------------------------------------------------------------------------------------------------------------------------------------------------------------------------------------------------|----|
| <b>Figure S 27</b> | Benesi-Hildebrand plots regarding the interactions between <b>3</b> and $\text{ClO}_4^-$ . The data for the linear plot are also presented.....                                                                 | 41 |
| <b>Figure S 28</b> | Emission spectra of <b>3</b> in the presence of various molar equivalents of $\text{CN}^-$ (DMSO/H <sub>2</sub> O 1:1 v/v, $C_3 = 2 \cdot 10^{-5}$ M, $\lambda_{\text{ex}} = 270$ nm). .....                    | 42 |
| <b>Figure S 29</b> | Stern-Volmer plot regarding the interactions between <b>3</b> and $\text{CN}^-$ . The data for the linear plot are also presented. ....                                                                         | 42 |
| <b>Figure S 30</b> | Plot for $(I-I_{\text{min}})/(I_{\text{max}}-I_{\text{min}})$ versus $\log(\text{CCN}^-)$ regarding the interactions between <b>3</b> and $\text{CN}^-$ . The data for the linear plot are also presented.....  | 43 |
| <b>Figure S 31</b> | Emission spectra of <b>3</b> in the presence of various molar equivalents of <b>AMP</b> (DMSO/H <sub>2</sub> O 1:1 v/v, $C_3 = 2 \cdot 10^{-5}$ M, $\lambda_{\text{ex}} = 270$ nm). .....                       | 43 |
| <b>Figure S 32</b> | Stern-Volmer plot regarding the interactions between <b>3</b> and <b>AMP</b> . The data for the linear plot are also presented. ....                                                                            | 44 |
| <b>Figure S 33</b> | Plot for $(I-I_{\text{min}})/(I_{\text{max}}-I_{\text{min}})$ versus $\log(C_{\text{AMP}})$ regarding the interactions between <b>3</b> and <b>AMP</b> . The data for the linear plot are also presented.....   | 44 |
| <b>Figure S 34</b> | Emission spectra of <b>3</b> in the presence of various molar equivalents of <b>ADP</b> (DMSO/H <sub>2</sub> O 1:1 v/v, $C_3 = 2 \cdot 10^{-5}$ M, $\lambda_{\text{ex}} = 270$ nm). .....                       | 45 |
| <b>Figure S 35</b> | Stern-Volmer plot regarding the interactions between <b>3</b> and <b>ADP</b> . The data for the linear plot are also presented. ....                                                                            | 45 |
| <b>Figure S 36</b> | Plot for $(I-I_{\text{min}})/(I_{\text{max}}-I_{\text{min}})$ versus $\log(C_{\text{AMP}})$ regarding the interactions between <b>3</b> and <b>ADP</b> . The data for the linear plot are also presented. ....  | 46 |
| <b>Figure S 37</b> | Emission spectra of <b>3</b> in the presence of various molar equivalents of <b>ATP</b> (DMSO/H <sub>2</sub> O 1:1 v/v, $C_3 = 2 \cdot 10^{-5}$ M, $\lambda_{\text{ex}} = 270$ nm). .....                       | 46 |
| <b>Figure S 38</b> | Stern-Volmer plot regarding the interactions between <b>3</b> and <b>ATP</b> . The data for the linear plot are also presented. ....                                                                            | 47 |
| <b>Figure S 39</b> | Plot for $(I-I_{\text{min}})/(I_{\text{max}}-I_{\text{min}})$ versus $\log(C_{\text{AMP}})$ regarding the interactions between <b>3</b> and <b>ATP</b> . The data for the linear plot are also presented.....   | 47 |
| <b>Figure S 40</b> | Emission spectra of <b>3</b> in the presence of various molar equivalents of <b>NADP</b> (DMSO/H <sub>2</sub> O 1:1 v/v, $C_3 = 2 \cdot 10^{-5}$ M, $\lambda_{\text{ex}} = 270$ nm). .....                      | 48 |
| <b>Figure S 41</b> | Stern-Volmer plot regarding the interactions between <b>3</b> and <b>NADP</b> . The data for the linear plot are also presented. ....                                                                           | 48 |
| <b>Figure S 42</b> | Plot for $(I-I_{\text{min}})/(I_{\text{max}}-I_{\text{min}})$ versus $\log(C_{\text{AMP}})$ regarding the interactions between <b>3</b> and <b>NADP</b> . The data for the linear plot are also presented. .... | 49 |
| <b>Figure S 43</b> | Emission spectra of <b>3</b> in the presence of various molar equivalents of <b>FAD</b> (DMSO/H <sub>2</sub> O 1:1 v/v, $C_3 = 2 \cdot 10^{-5}$ M, $\lambda_{\text{ex}} = 270$ nm). .....                       | 49 |
| <b>Figure S 44</b> | Stern-Volmer plot regarding the interactions between <b>3</b> and <b>FAD</b> . The data for the linear plot are also presented. ....                                                                            | 50 |
| <b>Figure S 45</b> | Plot for $(I-I_{\text{min}})/(I_{\text{max}}-I_{\text{min}})$ versus $\log(C_{\text{AMP}})$ regarding the interactions between <b>3</b> and <b>NADP</b> . The data for the linear plot are also presented. .... | 50 |
| <b>Figure S 46</b> | <sup>1</sup> H NMR (500 MHz, DMSO-d <sub>6</sub> ) spectrum of <b>3</b> in presence of various molar equivalents of $\text{Br}^-$ .....                                                                         | 27 |
| <b>Figure S 47</b> | Inset of the <sup>1</sup> H NMR (500 MHz, DMSO-d <sub>6</sub> ) spectrum of <b>3</b> in presence of various molar equivalents of $\text{Br}^-$ .....                                                            | 27 |
| <b>Figure S 48</b> | Chemical formula of adenosine monophosphate ( <b>AMP</b> ) with the marked protons (a, b) for which the shifts of signals were observed in the <sup>1</sup> H NMR spectrum .....                                | 28 |
| <b>Figure S 49</b> | <sup>1</sup> H NMR (500 MHz, DMSO-d <sub>6</sub> ) spectrum of <b>3</b> in presence of various molar equivalents of <b>AMP</b> (grey colour indicates signals that are shifted).....                            | 28 |
| <b>Figure S 50</b> | Insets of the <sup>1</sup> H NMR (500 MHz, DMSO-d <sub>6</sub> ) spectrum of <b>3</b> in presence of various molar equivalents of <b>AMP</b> .....                                                              | 29 |

|                    |                                                                                                                                                                                                                                              |    |
|--------------------|----------------------------------------------------------------------------------------------------------------------------------------------------------------------------------------------------------------------------------------------|----|
| <b>Figure S 51</b> | Insets of the <sup>1</sup> H NMR (500 MHz, DMSO- <i>d</i> <sub>6</sub> ) spectrum of <b>3</b> in presence of various molar equivalents of <b>AMP</b> (amplification of the shifted proton signals of the nucleobase of the nucleotide).....  | 29 |
| <b>Figure S 52</b> | Job's plot regarding the interactions between <b>3</b> and <b>AMP</b> (the red arrow indicates the estimated stoichiometry of the complex formed).....                                                                                       | 30 |
| <b>Figure S 53</b> | Chemical formula of adenosine diphosphate ( <b>ADP</b> ) with the marked protons (a, b), whose signals are shifted on the <sup>1</sup> H NMR spectrum.....                                                                                   | 30 |
| <b>Figure S 54</b> | <sup>1</sup> H NMR (500 MHz, DMSO- <i>d</i> <sub>6</sub> ) spectrum of <b>3</b> in presence of various molar equivalents of <b>ADP</b> (grey colour indicates signals that are shifted) .....                                                | 31 |
| <b>Figure S 55</b> | Insets of the <sup>1</sup> H NMR (500 MHz, DMSO- <i>d</i> <sub>6</sub> ) spectrum of <b>3</b> in presence of various molar equivalents of <b>ADP</b> (amplification of the shifted proton signals of the amide group).....                   | 31 |
| <b>Figure S 56</b> | Insets of the <sup>1</sup> H NMR (500 MHz, DMSO- <i>d</i> <sub>6</sub> ) spectrum of <b>3</b> in presence of various molar equivalents of <b>ADP</b> (amplification of the shifted proton signals of the nucleobase of the nucleotide) ..... | 32 |
| <b>Figure S 57</b> | Job's plot regarding the interactions between <b>3</b> and <b>ADP</b> (the red arrow indicates the estimated stoichiometry of the complex formed).....                                                                                       | 32 |
| <b>Figure S 58</b> | Size distribution pattern of <b>3</b> in DMSO.....                                                                                                                                                                                           | 51 |
| <b>Figure S 59</b> | Size distribution pattern of <b>3</b> in DMSO/H <sub>2</sub> O = 1/1 v/v system .....                                                                                                                                                        | 51 |
| <b>Figure S 60</b> | Size distribution pattern of <b>3</b> in DMSO/H <sub>2</sub> O = 9/1 v/v system .....                                                                                                                                                        | 52 |
| <b>Figure S 61</b> | SEM image of solid <b>3</b> obtained after column chromatography.....                                                                                                                                                                        | 53 |
| <b>Figure S 62</b> | SEM image of dried aggregates of <b>3</b> .....                                                                                                                                                                                              | 53 |

#### List of abbreviations:

- **EDCI**: 1-(3-Dimethylaminopropyl)-3-ethylcarbodiimide hydrochloride
- **DMAP**: *N,N*-Dimethylpyridin-4-amine
- **k-Oxyma**: (Z)-ethyl 2-cyano-3-hydroxyacrylate potassium salt
- **NHS**: *N*-hydroxysuccinimide
- **sulfo-NHS**: *N*-hydroxy- sulfosuccinimide
- **CDI**: 1,1'-Carbonyldiimidazole
- **HBTU**: 2-(1H-benzotriazol-1-yl)-1,1,3,3-tetramethyluronium hexafluorophosphate
- **EDC**: 1-(3-Dimethylaminopropyl)-3-ethylcarbodiimide
- **DIC**: *N,N'*-Diisopropylcarbodiimide
- **DCC**: *N,N'*-Dicyclohexylcarbodiimide
- **AMP**: adenosine monophosphate
- **ADP**: adenosine diphosphate
- **ATP**: adenosine triphosphate
- **NADP**: nicotinamide adenine dinucleotide phosphate
- **FAD**: flavin adenine dinucleotide
- **RT**: room temperature
- **h**: hours

## S1. Experimental section

### S1.1 Materials and methods

Chemical reagents and solvents for the synthesis were commercially purchased and purified according to the standard methods, if necessary. Thin layer chromatography (TLC) was performed using Merck Silica gel 60 F254 plates.

**The NMR experiments** were conducted using a Varian VNMRS 500 MHz spectrometer ( $^1\text{H}$  at 500 MHz,  $^{13}\text{C}\{^1\text{H}\}$  NMR at 125 MHz) equipped with a multinuclear z-gradient inverse probe head. The spectra were recorded at 25 °C and standard 5 mm NMR tubes were used.  $^1\text{H}$  and  $^{13}\text{C}$  chemical shifts ( $\delta$ ) were reported in parts per million (ppm) relative to the solvent signal, *i.e.*, DMSO- $d_6$ :  $\delta_{\text{H}}$  (residual DMSO) 2.50 ppm,  $\delta_{\text{C}}$  (residual DMSO) 39.5 ppm. In the case of NMR spectra were analyzed with the MestReNova v12.0 software (Mestrelab Research S.L).

**ESI-HRMS** (TOF) measurements were performed with a Q-Exactive ThermoScientific spectrometer.

**Elemental analyzes** were performed using CHNS Elementar Vario EL III apparatus. Each elemental composition was reported as an average of two analyses.

**UV-vis** measurements were performed with a WVR UV-1600PC spectrometer, with the spectral resolution of  $2\text{ cm}^{-1}$ . For the UV-Vis measurements, the wavelengths for the absorption maxima  $\lambda_{\text{max}}$  were reported in nm.

**Emission spectra** were recorded with a HITACHI F-7100 FL spectrometer; parameters for the spectra of liquid samples (DMSO solution): scan speed: 1200 nm/min, delay: 0.0 s, EX slit: 5.0 nm, EM slit: 5.0 nm, PMT voltage: 700 V; parameters for the spectra of samples of aggregates (DMSO/H<sub>2</sub>O solution in various proportions): scan speed: 1200 nm/min, delay: 0.0 s, EX slit: 5.0 nm, EM slit: 5.0 nm, PMT voltage: 400 V parameters for the spectra of solid samples: scan speed: 1200 nm/min, delay: 0.0 s, EX slit: 5.0 nm, EM slit: 5.0 nm, PMT voltage: 400 V. The wavelengths for the emission maxima ( $\lambda_{\text{em}}$ ) were reported in nm.

**SEM** Field emission scanning electron microscope Helios 5 PFIB (Thermo Scientific) with the use of SE (secondary electron) detector.

**Dynamic light scattering (DLS) measurements** were performed with Brookhaven Instruments Particle Size Analyser 90Plus

**For grinding in hand-held mortar** agate mortar with pestle was used (mortar diameter: 62 mm, pestle diameter: 24 mm)

**For grinding in glass vial** a vial (diameter: 18 mm) and rod (diameter: 8 mm) made of borosilicate glass were used.

**For sonochemical reactions** (Bandelin Sonorex RK 100H ultrasonic probe; ultrasonic peak output/HF power: 320W/80W; 35kHz) was used.

## **S1.2 Synthesis of compound 3 – synthesis in solvent**

### ***General method for the synthesis of compound 3 in solvent***

In a round-bottom flask, 4-(1,2,2-triphenylvinyl) benzoic acid (**1**) was placed. Then 5'-phenyl-[1,1':3',1''-terphenyl]-4-amine (**2**) was added, followed by an addition of coupling agent and an organic solvent (see Table S1). The reaction mixture was stirred at room temperature under an argon atmosphere. Then, a 1 mol·dm<sup>-3</sup> hydrochloric acid solution was added to the reaction mixture, and the crude product was extracted with CH<sub>2</sub>Cl<sub>2</sub> (3x20 mL). Organic layers were combined, washed with water and brine. After drying with MgSO<sub>4</sub> followed by filtration, volatiles were distilled off on a rotary evaporator. Finally, the product was purified using a column chromatography (SiO<sub>2</sub>, 2% hex/CH<sub>2</sub>Cl<sub>2</sub>) to provide the target compound **3** as a yellow solid (*Note: Compound 3 can also be purified by column chromatography with 50% c-hex/AcOEt, R<sub>f</sub> = 0.9*).

<sup>1</sup>H NMR (DMSO-*d*<sub>6</sub>, 500 MHz, ppm), δ<sub>H</sub> 10.29 (s, 1H) 7.91-7.85 (m, 11H), 7.78-7.76 (m, 2H), 7.53-7.50 (m, 4H), 7.43-7.40 (m, 2H), 7.20-7.12 (m, 11H), 7.04-7.00 (m, 6H); {<sup>1</sup>H}<sup>13</sup>C NMR (DMSO-*d*<sub>6</sub>, 125 MHz, ppm), 165.0, 146.7, 142.9, 142.8, 142.7, 141.6, 141.1, 140.2, 139.7, 138.9, 135.1, 132.6x2, 130.6, 128.9, 128.0, 127.9x2, 127.8, 127.7, 127.3x2, 127.2, 126.9, 126.7, 124.0x2, 120.6; HRMS (ESI) *m/z* [M]<sup>+</sup> calcd. for C<sub>51</sub>H<sub>37</sub>NO = 680.2948, found = 680.2942 *m/z*; Elemental analysis: Anal. Calcd for C<sub>51</sub>H<sub>37</sub>NO: C, 90.1; H, 5.49; N, 2.06. Found: C, 89.86; H, 5.49; N, 2.08. R<sub>f</sub> (2% hex/CH<sub>2</sub>Cl<sub>2</sub>) = 0.91

**Table S1** Conditions for the reaction in solvent

| no. | carboxylic acid (1)<br>(mg; mol; eq)                   | amine (2)<br>(mg; mol; eq)                               | solvent<br>(ml)    | coupling agent<br>(mg; mol; eq)                                                                                                  | time/<br>temp.      | yield<br>(mg; %)       |
|-----|--------------------------------------------------------|----------------------------------------------------------|--------------------|----------------------------------------------------------------------------------------------------------------------------------|---------------------|------------------------|
| 1   | 20; $5.31 \cdot 10^{-5}$ ; <u>1.0</u>                  | 17.1; $5.31 \cdot 10^{-5}$ ; <u>1.0</u>                  | DCM<br>(4)         | SOCl <sub>2</sub><br>7.58; $6.37 \cdot 10^{-5}$ ; <u>1.2</u>                                                                     | 24h/<br>RT          | 3.3 mg<br>9%           |
| 2   | 20; $5.31 \cdot 10^{-5}$ ; <u>1.0</u>                  | 17.1; $5.31 \cdot 10^{-5}$ ; <u>1.0</u>                  | DMF<br>(4)         | EDCI<br>10.0; $5.31 \cdot 10^{-5}$ ; <u>1.0</u><br>DMAP<br>1.30; $1.06 \cdot 10^{-5}$ ; <u>0.2</u>                               | 24h/<br>RT          | 7.8 mg<br>28%          |
| 3   | 20; $5.31 \cdot 10^{-5}$ ; <u>1.0</u>                  | 17.1; $5.31 \cdot 10^{-5}$ ; <u>1.0</u>                  | EtOAc<br>(4)       | EDCI<br>10.0; $5.31 \cdot 10^{-5}$ ; <u>1.0</u><br>DMAP<br>1.30; $1.06 \cdot 10^{-5}$ ; <u>0.2</u>                               | 24h/<br>RT          | 16.7 mg<br>46%         |
| 4   | 20; $5.31 \cdot 10^{-5}$ ; <u>1.0</u>                  | 17.1; $5.31 \cdot 10^{-5}$ ; <u>1.0</u>                  | THF<br>(4)         | EDCI<br>10.0; $5.31 \cdot 10^{-5}$ ; <u>1.0</u><br>DMAP<br>1.30; $1.06 \cdot 10^{-5}$ ; <u>0.2</u>                               | 170h/<br>RT         | 16.7 mg<br>46%         |
| 5   | <b>20; <math>5.31 \cdot 10^{-5}</math>; <u>1.0</u></b> | <b>17.1; <math>5.31 \cdot 10^{-5}</math>; <u>1.0</u></b> | <b>DCM<br/>(4)</b> | <b>EDCI<br/>10.0; <math>5.31 \cdot 10^{-5}</math>; <u>1.0</u><br/>DMAP<br/>1.30; <math>1.06 \cdot 10^{-5}</math>; <u>0.2</u></b> | <b>170h/<br/>RT</b> | <b>17.3 mg<br/>48%</b> |

### S1.3 Synthesis of compound 3 – mechanochemistry

#### *General method for the mechanochemical synthesis of compound 3*

4-(1,2,2-Triphenylvinyl) benzoic acid (**1**), 5'-phenyl-[1,1':3',1"-terphenyl]-4-amine (**2**) and a coupling agent were grinded in presence of small amount of organic solvent (LAG – Liquid Assisted Grinding) at room temperature (see Table S2). Then a 1 mol·dm<sup>-3</sup> hydrochloric acid solution was added to the reaction mixture, and the crude product was extracted with CH<sub>2</sub>Cl<sub>2</sub> (3x20 mL). Organic layers were combined, washed with water and brine. After drying with MgSO<sub>4</sub> followed by filtration, volatiles were distilled off on a rotary evaporator. Finally, the product was purified using a column chromatography (SiO<sub>2</sub>, 2% hex/CH<sub>2</sub>Cl<sub>2</sub>) to provide the target compound **3** as a yellow solid.



**Table S2** Conditions for the mechanochemical synthesis

| no. | carboxylic acid (1)<br>(mg; mol; eq) | amine (2)<br>(mg; mol; eq)       | solvent<br>( $\mu$ l) | coupling agent<br>(mg; mol; eq)                                                                                | time/<br>temp. | yield<br>(mg; %)                                    |
|-----|--------------------------------------|----------------------------------|-----------------------|----------------------------------------------------------------------------------------------------------------|----------------|-----------------------------------------------------|
| 6   | 20; $5.31 \cdot 10^{-5}$ ; 1.0       | 17.1; $5.31 \cdot 10^{-5}$ ; 1.0 | DCM<br>(50)           | k-Oxyma<br>9.56; $5.31 \cdot 10^{-5}$ ; 1                                                                      | 15min/<br>RT   | grinding in<br>hand-held<br>mortar<br>0.0 mg / 0%   |
| 7   | 20; $5.31 \cdot 10^{-5}$ ; 1.0       | 17.1; $5.31 \cdot 10^{-5}$ ; 1.0 | DCM<br>(50)           | EDCI<br>10.0; $5.31 \cdot 10^{-5}$ ; 1.0<br>NHS<br>6.11; $5.31 \cdot 10^{-5}$ ; 1                              | 15min/<br>RT   | grinding in<br>hand-held<br>mortar<br>1.0 mg / 3%   |
| 8   | 20; $5.31 \cdot 10^{-5}$ ; 1.0       | 17.1; $5.31 \cdot 10^{-5}$ ; 1.0 | DCM<br>(50)           | CDI<br>8.61; $5.31 \cdot 10^{-5}$ ; 1.0                                                                        | 15 min/<br>RT  | grinding in<br>hand-held<br>mortar<br>2.7 mg / 5%   |
| 9   | 20; $5.31 \cdot 10^{-5}$ ; 1.0       | 17.1; $5.31 \cdot 10^{-5}$ ; 1.0 | DCM<br>(50)           | HBTU<br>20.1; $5.31 \cdot 10^{-5}$ ; 1.0                                                                       | 15 min/<br>RT  | grinding in<br>hand-held<br>mortar<br>2.8 mg / 8%   |
| 10  | 20; $5.31 \cdot 10^{-5}$ ; 1.0       | 17.1; $5.31 \cdot 10^{-5}$ ; 1.0 | DCM<br>(50)           | EDCI<br>10.0; $5.31 \cdot 10^{-5}$ ; 1.0<br>FeCl <sub>3</sub><br>43.1; $1.59 \cdot 10^{-4}$ ; 3                | 15 min/<br>RT  | grinding in<br>hand-held<br>mortar<br>4.2 mg / 12%  |
| 11  | 20; $5.31 \cdot 10^{-5}$ ; 1.0       | 17.1; $5.31 \cdot 10^{-5}$ ; 1.0 | DCM<br>(50)           | EDCI<br>10.0; $6.44 \cdot 10^{-5}$ ; 1.2<br>K <sub>3</sub> PO <sub>4</sub><br>33.8; $1.59 \cdot 10^{-4}$ ; 3   | 15 min/<br>RT  | grinding in<br>hand-held<br>mortar<br>7.9 mg / 22%  |
| 12  | 20; $5.31 \cdot 10^{-5}$ ; 1.0       | 17.1; $5.31 \cdot 10^{-5}$ ; 1.0 | -                     | EDC<br>10.0; $6.44 \cdot 10^{-5}$ ; 1.2                                                                        | 15 min/<br>RT  | grinding in<br>hand-held<br>mortar<br>7.9 mg / 22%  |
| 13  | 20; $5.31 \cdot 10^{-5}$ ; 1.0       | 17.1; $5.31 \cdot 10^{-5}$ ; 1.0 | DCM<br>(50)           | EDCI<br>10.0; $5.31 \cdot 10^{-5}$ ; 1.0<br>DIPEA<br>20.6; $1.59 \cdot 10^{-4}$ ; 3.0                          | 15 min/<br>RT  | grinding in<br>hand-held<br>mortar<br>8.4 mg / 23%  |
| 14  | 20; $5.31 \cdot 10^{-5}$ ; 1.0       | 17.1; $5.31 \cdot 10^{-5}$ ; 1.0 | DCM<br>(50)           | EDCI<br>10.0; $5.31 \cdot 10^{-5}$ ; 1.0<br>K <sub>2</sub> CO <sub>3</sub><br>22.0; $1.59 \cdot 10^{-4}$ ; 3.0 | 15 min/<br>RT  | grinding in<br>hand-held<br>mortar<br>8.8 mg / 24%  |
| 15  | 20; $5.31 \cdot 10^{-5}$ ; 1.0       | 17.1; $5.31 \cdot 10^{-5}$ ; 1.0 | DCM<br>(50)           | EDCI<br>10.0; $5.31 \cdot 10^{-5}$ ; 1.0<br>DMAP<br>1.50; $1.06 \cdot 10^{-5}$ ; 0.2                           | 15 min/<br>RT  | grinding in<br>hand-held<br>mortar<br>9.3 mg / 26%  |
| 16  | 20; $5.31 \cdot 10^{-5}$ ; 1.0       | 17.1; $5.31 \cdot 10^{-5}$ ; 1.0 | DCM<br>(50)           | EDCI<br>10.0; $5.31 \cdot 10^{-5}$ ; 1.0<br>sulfo-NHS<br>11.5; $5.31 \cdot 10^{-5}$ ; 1.0                      | 15 min/<br>RT  | grinding in<br>hand-held<br>mortar<br>12.7 mg / 35% |
| 17  | 20; $5.31 \cdot 10^{-5}$ ; 1.0       | 17.1; $5.31 \cdot 10^{-5}$ ; 1.0 | DCM<br>(50)           | DIC<br>6.70; $5.31 \cdot 10^{-5}$ ; 1.0                                                                        | 15 min/<br>RT  | grinding in<br>hand-held<br>mortar<br>13.4 mg / 37% |
| 18  | 20; $5.31 \cdot 10^{-5}$ ; 1.0       | 17.1; $5.31 \cdot 10^{-5}$ ; 1.0 | -                     | EDCI<br>10.0; $5.31 \cdot 10^{-5}$ ; 1.0                                                                       | 15 min/<br>RT  | grinding in<br>hand-held<br>mortar<br>14.8 mg / 41% |
| 19  | 20; $5.31 \cdot 10^{-5}$ ; 1.0       | 17.1; $5.31 \cdot 10^{-5}$ ; 1.0 | DCM<br>(50)           | DCC<br>10.9; $5.31 \cdot 10^{-5}$ ; 1.0                                                                        | 15 min/<br>RT  | grinding in<br>hand-held<br>mortar<br>16.5 mg / 45% |

|    |                                       |                                         |            |                                                                                            |               |                                               |
|----|---------------------------------------|-----------------------------------------|------------|--------------------------------------------------------------------------------------------|---------------|-----------------------------------------------|
| 20 | 20; $5.31 \cdot 10^{-5}$ ; <u>1.0</u> | 17.1; $5.31 \cdot 10^{-5}$ ; <u>1.0</u> | DCM (50)   | DCC<br>10.9; $5.31 \cdot 10^{-5}$ ; <u>1.0</u>                                             | 15 min/<br>RT | grinding in glass tube<br>16.2 mg / 45%       |
| 21 | 20; $5.31 \cdot 10^{-5}$ ; <u>1.0</u> | 17.1; $5.31 \cdot 10^{-5}$ ; <u>1.0</u> | DCM (50)   | EDCI<br>10.0; $5.31 \cdot 10^{-5}$ ; <u>1.0</u>                                            | 15 min/<br>RT | grinding in hand-held mortar<br>18.9 mg / 52% |
| 22 | 20; $5.31 \cdot 10^{-5}$ ; <u>1.0</u> | 17.1; $5.31 \cdot 10^{-5}$ ; <u>1.0</u> | EtOAc (50) | EDCI<br>10.0; $5.31 \cdot 10^{-5}$ ; <u>1.0</u>                                            | 15 min/<br>RT | grinding in hand-held mortar<br>18.9 mg / 52% |
| 23 | 20; $5.31 \cdot 10^{-5}$ ; <u>1.0</u> | 17.1; $5.31 \cdot 10^{-5}$ ; <u>1.0</u> | DCM (50)   | EDCI<br>10.0; $5.31 \cdot 10^{-5}$ ; <u>1.0</u>                                            | 5 min/<br>RT  | grinding in hand-held mortar<br>19.3 mg / 53% |
| 24 | 20; $5.31 \cdot 10^{-5}$ ; <u>1.0</u> | 17.1; $5.31 \cdot 10^{-5}$ ; <u>1.0</u> | DCM (50)   | EDCI<br>10.0; $5.31 \cdot 10^{-5}$ ; <u>1.0</u><br>NaCl<br>18.7; $3.2 \cdot 10^{-4}$ ; 6.0 | 15 min/<br>RT | grinding in hand-held mortar<br>19.9 mg / 55% |
| 25 | 20; $5.31 \cdot 10^{-5}$ ; <u>1.0</u> | 17.1; $5.31 \cdot 10^{-5}$ ; <u>1.0</u> | DCM (50)   | EDCI<br>10.0; $5.31 \cdot 10^{-5}$ ; <u>1.0</u><br>SiO <sub>2</sub> 20 mg                  | 15 min/<br>RT | grinding in hand-held mortar<br>19.9 mg / 55% |
| 26 | 20; $5.31 \cdot 10^{-5}$ ; <u>1.0</u> | 17.1; $5.31 \cdot 10^{-5}$ ; <u>1.0</u> | DCM (50)   | EDCI<br>10.0; $5.31 \cdot 10^{-5}$ ; <u>1.0</u>                                            | 30 min/<br>RT | grinding in hand-held mortar<br>19.9 mg / 55% |
| 27 | 20; $5.31 \cdot 10^{-5}$ ; <u>1.0</u> | 17.1; $5.31 \cdot 10^{-5}$ ; <u>1.0</u> | EtOAc (50) | EDCI<br>10.0; $5.31 \cdot 10^{-5}$ ; <u>1.0</u>                                            | 30 min/<br>RT | grinding in glass tube<br>28.4 mg / 80%       |
| 28 | 20; $5.31 \cdot 10^{-5}$ ; <u>1.0</u> | 17.1; $5.31 \cdot 10^{-5}$ ; <u>1.0</u> | DCM (50)   | EDCI<br>10.0; $5.31 \cdot 10^{-5}$ ; <u>1.0</u>                                            | 15 min/<br>RT | grinding in glass tube<br>30.5 mg / 84%       |
| 29 | 20; $5.31 \cdot 10^{-5}$ ; <u>1.0</u> | 17.1; $5.31 \cdot 10^{-5}$ ; <u>1.0</u> | DCM (50)   | EDCI<br>10.0; $5.31 \cdot 10^{-5}$ ; <u>1.0</u>                                            | 30 min/<br>RT | grinding in glass tube<br>34.8 mg / 96%       |

To check the repeatability of the designed grinding-induced protocol, we performed the mechanochemical synthesis of the target compound **3** under optimized mechanochemical conditions (grinding in glass vial with glass rod, reaction time: 30 minutes, 1.0 equiv. of EDCI) three times (independent runs), at the similar scales and on different days. The obtained isolated yields were consistent and equalled  $93 \pm 3\%$ . <sup>1</sup>H NMR analyses supported the isolation of pure **3** in each synthesis. The data for these experiments are presented below:

*Run#1:*

Synthesis date: 6.12.2022, reaction scale (mmol of amine **2**): 0.0531, mmol of the product **3** obtained: 0.0510, isolated yield of **3**: 96%

*Run#2:*

Synthesis date: 15.03.2024, reaction scale (mmol of amine **2**): 0.0531, mmol of the product **3** obtained: 0.0478, isolated yield of **3**: 90%

*Run#3:*

Synthesis date: 18.03.2024, reaction scale (mmol of amine **2**): 0.0531, mmol of the product **3** obtained: 0.0489, isolated yield of **3**: 92%

<sup>1</sup>H NMR spectra (DMSO-*d*<sub>6</sub>) of the samples of compound **3** from the above-listed mechanochemical reaction runs:

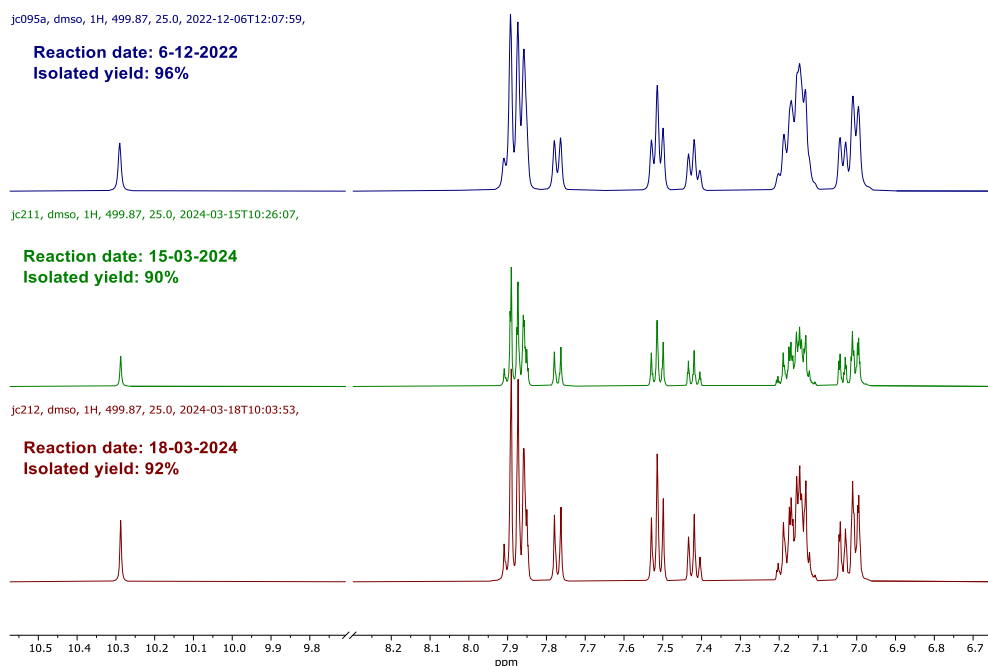

## S1.4 Synthesis of compound **3** – sonochemistry

### *General method for the sonochemical synthesis of compound **3***

In a round-bottom flask 4-(1,2,2-triphenylvinyl) benzoic acid (**1**) was placed. Then 5'-phenyl-[1,1':3',1''-terphenyl]-4-amine (**2**) was added, followed by coupling agent and organic solvent. The flask was then placed in an ultrasonic bath. Then a 1 mol·dm<sup>-3</sup> hydrochloric acid solution was added to the reaction mixture, and the crude product was extracted with CH<sub>2</sub>Cl<sub>2</sub> (3x20 mL). Organic layers were combined, washed with water and brine. After drying with MgSO<sub>4</sub> followed by filtration, volatiles were distilled off on a rotary evaporator. Finally, the product was purified using a column chromatography (SiO<sub>2</sub>, 2% hex/CH<sub>2</sub>Cl<sub>2</sub>) to provide the target compound **3** as yellow solid.

**Table S3** Conditions for the sonochemical synthesis

| no. | carboxylic acid<br>( <b>1</b> )<br>(mg; mol; eq) | amine ( <b>2</b> )<br>(mg; mol; eq)         | solvent<br>(ml) | coupling agent<br>(mg; mol; eq)                  | time/<br>temp. | yield<br>(mg; %) |
|-----|--------------------------------------------------|---------------------------------------------|-----------------|--------------------------------------------------|----------------|------------------|
| 33  | 20; 5.31·10 <sup>-5</sup> ; <u>1.0</u>           | 17.1; 5.31·10 <sup>-5</sup> ;<br><u>1.0</u> | EtOAc<br>(4)    | EDCI<br>10.0; 5.31·10 <sup>-5</sup> ; <u>1.0</u> | 60 min/<br>RT  | 11.6 mg / 32%    |
| 34  | 20; 5.31·10 <sup>-5</sup> ; <u>1.0</u>           | 17.1; 5.31·10 <sup>-5</sup> ;<br><u>1.0</u> | DCM<br>(0.2)    | EDCI<br>10.0; 5.31·10 <sup>-5</sup> ; <u>1.0</u> | 60 min/<br>RT  | 28.1 mg / 78%    |

## S1.5 Green chemistry metrics

### Safety considerations

**Table S4** Hazards of the coupling reagents and solvents

| compound                                                                                                            | hazard statements                                                        | meaning                                                                                                                                                                                                                          | thermal stability |
|---------------------------------------------------------------------------------------------------------------------|--------------------------------------------------------------------------|----------------------------------------------------------------------------------------------------------------------------------------------------------------------------------------------------------------------------------|-------------------|
| <p><b>TPE-COOH</b></p> 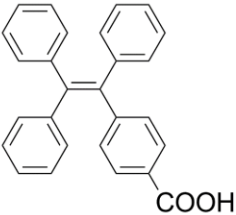            | <p>H302<br/>H315<br/>H319<br/>H335</p>                                   | <p>Harmful if swallowed<br/>Causes skin irritation<br/>Causes serious eye irritation<br/>May cause respiratory irritation</p>                                                                                                    | n/a               |
| <p><b>TPB-NH<sub>2</sub></b></p>  | <p>H302<br/>H315<br/>H319<br/>H332<br/>H335</p>                          | <p>Harmful if swallowed<br/>Causes skin irritation<br/>Causes serious eye irritation<br/>Acute toxicity, inhalation<br/>Specific target organ toxicity, single exposure; Respiratory system</p>                                  | n/a               |
| <p><b>EDCI</b></p>  <p>HCl</p>   | <p>H302<br/>H315<br/>H319<br/>H335</p>                                   | <p>Harmful if swallowed<br/>Causes skin irritation<br/>Causes serious eye irritation<br/>May cause respiratory irritation</p>                                                                                                    | n/a               |
| <p><b>DMAP</b></p>               | <p>H301, H331<br/><br/>H310<br/>H315<br/>H318<br/>H370<br/><br/>H411</p> | <p>Toxic if swallowed or if inhaled<br/>Fatal in contact with skin<br/>Causes skin irritation<br/>Causes serious eye damage<br/>Causes damage to organs (Nervous system)<br/>Toxic to aquatic life with long lasting effects</p> | n/a               |
| <p><b>dichloromethane</b></p>                                                                                       | <p>H315<br/>H319<br/>H336<br/><br/>H351</p>                              | <p>Causes skin irritation<br/>Causes serious eye irritation<br/>May cause drowsiness or dizziness<br/>Suspected of causing cancer</p>                                                                                            | n/a               |

## First pass green metrics calculations

| EDCI/ DMAP, synthesis in solution  |              |               |          |          |          |         |               | Summary of First Pass Metrics Toolkit |                           |                               |             |                 |          |                |                           |                               |               |
|------------------------------------|--------------|---------------|----------|----------|----------|---------|---------------|---------------------------------------|---------------------------|-------------------------------|-------------|-----------------|----------|----------------|---------------------------|-------------------------------|---------------|
| Reactant (Limiting Reactant First) | Mass (g)     | MW (g/mol)    | Mol      | Catalyst | Mass (g) | Reagent | Mass (g)      | Reaction solvent                      | Volume (cm <sup>3</sup> ) | Density (g·ml <sup>-1</sup> ) | Mass (g)    | Workup chemical | Mass (g) | Workup solvent | Volume (cm <sup>3</sup> ) | Density (g·cm <sup>-1</sup> ) | Mass (g)      |
| TPE-COOH                           | 0.02         | 376.45        | 5.31E-05 |          |          | DMAP    | 0.0013        | DCM                                   | 4                         | 1.33                          | 5.32        |                 |          | n-hexane       | 3                         | 0.661                         | 1.983         |
| TPB-NH <sub>2</sub>                | 0.017        | 321.41        | 5.31E-05 |          |          |         |               |                                       |                           |                               |             |                 |          | DCM            | 147                       | 1.33                          | 195.51        |
| EDCI                               | 0.01         | 191.17        | 5.31E-05 |          |          |         |               |                                       |                           |                               |             |                 |          |                |                           |                               |               |
| <b>Total</b>                       | <b>0.047</b> | <b>889.03</b> |          |          |          |         | <b>0.0013</b> |                                       |                           |                               | <b>5.32</b> |                 |          |                |                           |                               | <b>197.49</b> |

  

| Yield                 | 48.0   | Product                    | 0.03477 | MW                                                                                               | 679.846                                                                                                              | Mol | 0.0000511          | Solvents (first pass)                                                                                    |                                                                                                  |  | Tick       |   |
|-----------------------|--------|----------------------------|---------|--------------------------------------------------------------------------------------------------|----------------------------------------------------------------------------------------------------------------------|-----|--------------------|----------------------------------------------------------------------------------------------------------|--------------------------------------------------------------------------------------------------|--|------------|---|
| Selectivity           | 100.0  | Unreacted Limited Reactant | 0.0008  | $\text{RME} = \frac{\text{mass of isolated product}}{\text{total mass of reactants}} \times 100$ |                                                                                                                      |     | Preferred solvents | water, EtOH, <i>n</i> -BuOH, <i>i</i> -PrOH, EtOAc, <i>i</i> -PrOAc, <i>n</i> -BuOAc, anisole, sulfolane |                                                                                                  |  |            |   |
| AE                    | 67.2   |                            |         |                                                                                                  | $\text{AE} = \frac{\text{molecular weight of product}}{\text{total molecular weight of reactants}} \times 100$       |     |                    | Problematic solvents                                                                                     | DMSO, AcOH, Acetonitrile, AcOMe, THF, heptane, toluene, MTBE, cyclohexane, chlorobenzene, Me-THF |  |            |   |
| RME                   | 71.9   |                            |         |                                                                                                  |                                                                                                                      |     |                    | Hazardous solvents                                                                                       | dioxane, TEA, DME, DCM, DMF, hexane                                                              |  |            | + |
| OE                    | 96.3   |                            |         |                                                                                                  |                                                                                                                      |     |                    | Highly hazardous solvents                                                                                | Et <sub>2</sub> O, benzene, CCl <sub>4</sub> , chloroform, nitromethane, CS <sub>2</sub>         |  |            |   |
| PMI total             | 5834.4 |                            |         |                                                                                                  |                                                                                                                      |     |                    | Catalyst/enzyme (First pass)                                                                             |                                                                                                  |  | Tick       |   |
| PMI reaction          | 154.4  |                            |         |                                                                                                  | $\text{PMI} = \text{mass intensity} = \frac{\text{total mass in a process or process step}}{\text{mass of product}}$ |     |                    | catalyst or enzyme used or reaction takes place without any catalyst/                                    |                                                                                                  |  | Green Flag |   |
| Reagents, catalyst    | 0.047  |                            |         |                                                                                                  |                                                                                                                      |     |                    | Use of stoichiometric quantities of reagents                                                             |                                                                                                  |  | Amber Flag |   |
| PMI reaction solvents | 153.0  |                            |         |                                                                                                  |                                                                                                                      |     |                    | use of reagents in excess                                                                                |                                                                                                  |  | Red Flag   |   |
| PMI reagents          | 0.037  |                            |         |                                                                                                  | $\text{OE} = \frac{\text{RME}}{\text{AE}} \times 100$                                                                |     |                    |                                                                                                          |                                                                                                  |  |            |   |
| PMI workup chemical   | 0.0    |                            |         |                                                                                                  |                                                                                                                      |     |                    |                                                                                                          |                                                                                                  |  |            |   |
| PMI workup solvent    | 5680.0 |                            |         |                                                                                                  |                                                                                                                      |     |                    |                                                                                                          |                                                                                                  |  |            |   |

### EDCI/ DMAP, synthesis in solution

| Critical Elements | Flag Colour | Note element |
|-------------------|-------------|--------------|
| Supply Remaining  | Red Flag    |              |
| 5-50 years        | Red Flag    |              |
| 50-500 years      | Amber Flag  |              |
| +500 years        | Green Flag  | +            |

| Energy                                        | Tick         |
|-----------------------------------------------|--------------|
| Reaction run between 0 to 70°C                | Green Flag + |
| Reaction run between -20 to 0 or 70 to 140°C  | Amber Flag   |
| Reaction run between below -20 or above 140°C | Red Flag     |

| Batch/Flow | Tick         |
|------------|--------------|
| Flow       | Green Flag   |
| Batch      | Amber Flag + |

#### Health and Safety

|                            | Red Flag                     | Amber Flag                   | Green Flag                                                 | List substances nad H-codes | List substances nad H-codes | List substances nad H-codes |     |
|----------------------------|------------------------------|------------------------------|------------------------------------------------------------|-----------------------------|-----------------------------|-----------------------------|-----|
| Highly Explosive           | H200, H201, H202, H203       | H205, H220, H224             | If no red or amber flagged H codes present then green flag |                             |                             | TPE-COOH                    |     |
| Explosive thermal runaway  | H230, H240, H250             | H241                         |                                                            |                             |                             | TPB-NH <sub>2</sub>         |     |
| Toxic                      | H300, H310, H330             | H301, H311, H331             |                                                            |                             | DMAP                        | DMAP                        |     |
| Long Term Toxicity         | H340, H350, H360, H370, H372 | H341, H351, H361, H371, H373 |                                                            |                             |                             |                             | DCM |
| Environmental Implications | H400, H410, H411, H420       | H401, H412                   |                                                            |                             |                             |                             |     |

| Use of chemicals of environmental concern                                            | List of substances |
|--------------------------------------------------------------------------------------|--------------------|
| Chemical identified as Substances of Very High Concern by ChemSec which are utilised | Red Flag           |

|                                                        |            |             |
|--------------------------------------------------------|------------|-------------|
| Reaction run at reflux                                 | Red Flag   | Tick        |
| Reaction run 5°C or below the solvent boiling point    | Green Flag | +           |
| <b>Workup</b>                                          |            | <b>Tick</b> |
| quenching                                              | Green Flag |             |
| filtration                                             |            |             |
| centrifugation                                         |            |             |
| crystallisation                                        |            |             |
| low temperature distillation/ evaporation/ sublimation |            |             |
| solvent exchange, quenching into aqueous solvent       | Amber Flag |             |
| chromatography                                         | Red Flag   | +           |
| high temperature                                       |            |             |
| multiple crystallisation                               |            |             |

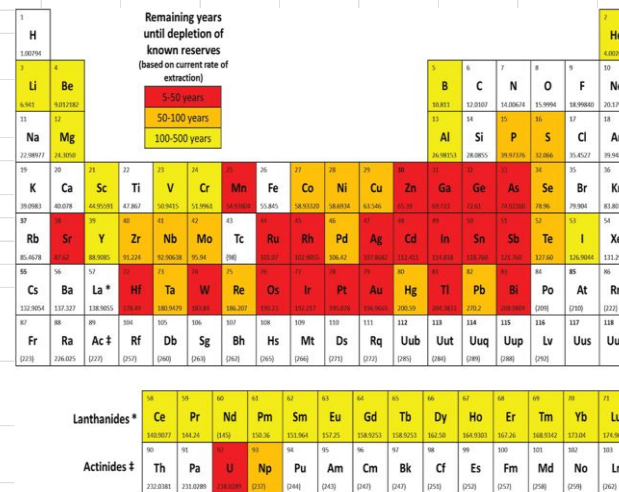

| EDCI, mechanochemistry             |              |            |          |          |          |         |          | Summary of First Pass Metrics Toolkit |                           |                               |          |                 |          |                |                           |                               |               |
|------------------------------------|--------------|------------|----------|----------|----------|---------|----------|---------------------------------------|---------------------------|-------------------------------|----------|-----------------|----------|----------------|---------------------------|-------------------------------|---------------|
| Reactant (Limiting Reactant First) | Mass (g)     | MW (g/mol) | Mol      | Catalyst | Mass (g) | Reagent | Mass (g) | Reaction solvent                      | Volume (cm <sup>3</sup> ) | Density (g·mL <sup>-1</sup> ) | Mass (g) | Workup chemical | Mass (g) | Workup solvent | Volume (cm <sup>3</sup> ) | Density (g·cm <sup>-1</sup> ) | Mass (g)      |
| TPE-COOH                           | 0.02         | 376.45     | 5.30E-05 |          |          |         |          | DCM                                   | 0.05                      | 1.33                          | 0.0665   |                 |          | n-hexane       | 3                         | 0.661                         | 1.983         |
| TPB-NH <sub>2</sub>                | 0.017        | 321.41     | 5.30E-05 |          |          |         |          |                                       |                           |                               |          |                 |          | DCM            | 147                       | 1.33                          | 195.51        |
| EDCI                               | 0.01         | 191.17     | 5.30E-05 |          |          |         |          |                                       |                           |                               |          |                 |          |                |                           |                               |               |
| <b>Total</b>                       | <b>0.047</b> | 889.03     |          |          |          |         |          |                                       |                           |                               | 0.07     |                 |          |                |                           |                               | <b>197.49</b> |

  

| Yield                 | 96.0   |  | Mass (g)                   | MW      | Mol     | Solvents (first pass) |                                                                               |                                                                                                          | Tick       |      |
|-----------------------|--------|--|----------------------------|---------|---------|-----------------------|-------------------------------------------------------------------------------|----------------------------------------------------------------------------------------------------------|------------|------|
| Selectivity           | 100.0  |  | Product                    | 0.03477 | 679.846 | 0.0000511             | Preferred solvents                                                            | water, EtOH, <i>n</i> -BuOH, <i>i</i> -PrOH, EtOAc, <i>i</i> -PrOAc, <i>n</i> -BuOAc, anisole, sulfolane |            |      |
| AE                    | 76.4   |  | Unreacted Limited Reactant | 0.0008  |         |                       | Problematic solvents                                                          | DMSO, AcOH, Acetonitrile, AcOMe, THF, heptane, toluene, MTBE, cyclohexane, chlorobenzene, Me-THF         |            |      |
| RME                   | 73.4   |  |                            |         |         |                       | Hazardous solvents                                                            | dioxane, TEA, DME, DCM, DMF, hexane                                                                      | +          |      |
| OE                    | 96.1   |  |                            |         |         |                       | Highly hazardous solvents                                                     | Et <sub>2</sub> O, benzene, CCl <sub>4</sub> , chloroform, nitromethane, CS <sub>2</sub>                 |            |      |
| PMI total             | 5683.2 |  |                            |         |         |                       | Catalyst/enzyme (First pass)                                                  |                                                                                                          |            | Tick |
| PMI reaction          | 3.3    |  |                            |         |         |                       | catalyst or enzyme used or reaction takes place without any catalyst/ reagent |                                                                                                          | Green Flag |      |
| Reagents, catalyst    | 0.000  |  |                            |         |         |                       | Use of stoichiometric quantities of reagents                                  |                                                                                                          | Amber Flag | +    |
| PMI reaction solvents | 1.9    |  |                            |         |         |                       | Use of reagents in excess                                                     |                                                                                                          | Red Flag   |      |
| PMI reagents          | 0.0    |  |                            |         |         |                       |                                                                               |                                                                                                          |            |      |
| PMI workup chemical   | 0.0    |  |                            |         |         |                       |                                                                               |                                                                                                          |            |      |
| PMI workup solvent    | 5680.0 |  |                            |         |         |                       |                                                                               |                                                                                                          |            |      |

  

$$RME = \frac{\text{mass of isolated product}}{\text{total mass of reactants}} \times 100$$

$$AE = \frac{\text{molecular weight of product}}{\text{total molecular weight of reactants}} \times 100$$

$$PMI = \text{mass intensity} = \frac{\text{total mass in a process or process step}}{\text{mass of product}}$$

$$OE = \frac{RME}{AE} \times 100$$





## S1.6 Characterisation of aggregation induced emission effect

The characterisation of aggregation induced emission behavior of compound **3** was performed employing measurements of the emission spectra. The experiments were performed in the DMSO/H<sub>2</sub>O solvent mixture. Stock solution of **3** ( $2 \cdot 10^{-3}$  M) in DMSO was diluted with proper volume of pure DMSO followed by addition of H<sub>2</sub>O to reach given vol% of H<sub>2</sub>O in the sample.

## S1.7 Anion binding experiments

### S1.7.1 <sup>1</sup>H NMR spectroscopy

The binding experiments between compound **3** (receptor) and anions (Br<sup>-</sup>, AMP and ADP) were performed employing the <sup>1</sup>H NMR titration experiments. Tetrabutylammonium bromide ([N(C<sub>4</sub>H<sub>9</sub>)<sub>4</sub>]<sup>+</sup>) was used in these experiments. The experiments were performed in DMSO-d<sub>6</sub> containing TMS (tetramethylsilane, 0.03% vol) as follows. To a stock solution of **3** ( $7.5 \cdot 10^{-3}$  M) in DMSO-d<sub>6</sub> a stock solution of analyte ( $7.5 \cdot 10^{-3}$  M) in DMSO-d<sub>6</sub> was added, followed by addition of DMSO-d<sub>6</sub> to reach given concentration of analyte in the sample (in case of AMP and ADP stock solution of **3** and stock solution of analyte were mixed in such a way that the sum of receptor (**3**) and analyte concentrations in the sample were on the constant level with varying molar fractions). Final volume of the samples was 1 mL.

### S1.7.2 Spectrofluorimetry

The anion binding experiments between compound **3** (receptor) and anions (analytes; Br<sup>-</sup>, I<sup>-</sup>, HSO<sub>4</sub><sup>-</sup>, BF<sub>4</sub><sup>-</sup>, H<sub>2</sub>PO<sub>4</sub><sup>-</sup>, ClO<sub>4</sub><sup>-</sup>, CN<sup>-</sup>, AMP, ADP, ATP, NADP and FAD) were performed employing the emission spectra titration experiments. In all cases, tetrabutylammonium ([N(C<sub>4</sub>H<sub>9</sub>)<sub>4</sub>]<sup>+</sup>) salts of anions were used. The experiments were performed in the DMSO/H<sub>2</sub>O = 1:1 v/v system as follows. Stock solution of **3** ( $2 \cdot 10^{-3}$  M) in DMSO was diluted with adequate volume of pure DMSO (to reach volume of 1 mL), followed by addition of H<sub>2</sub>O solution containing given anion (final concentration of anion was between  $5 \cdot 10^{-6}$  M and  $2 \cdot 10^{-4}$  M).

## S1.9 Estimation of fluorescence quantum yield

The measurements were performed at room temperature according to the published procedures.<sup>1,2</sup> Fluorescence quantum yields ( $\Phi_F$ ) were determined by comparison with quinine sulfate (QS) in 0.5M H<sub>2</sub>SO<sub>4</sub> ( $\Phi_{F,ref} = 0.55$ <sup>3</sup>) as the standard. The measurements were performed with diluted solutions (absorbance for the highest wavelength  $A < 0.1$  a.u.). The selected excitation

wavelengths ( $\lambda_{\text{ex}}$ ) were as follows:  $C_{\text{QS}} = 2 \cdot 10^{-6}$  M;  $C_{\mathbf{3}} = 2 \cdot 10^{-6}$  M,  $\lambda_{\text{ex}} = 351$  nm;  $C_{\mathbf{3agg.}} = 2 \cdot 10^{-6}$  M,  $\lambda_{\text{ex}} = 343$  nm.

The following formula was used for the calculation of  $\Phi_{\text{F}}$ :

$$\Phi_{\text{F}} = \Phi_{\text{F,ref}} \cdot \frac{F_{\text{sample}}}{F_{\text{reference}}} \cdot \frac{1 - 10^{-A_{\text{ref}}}}{1 - 10^{-A_{\text{sample}}}} \cdot \frac{n_{\text{sample}}^2}{n_{\text{reference}}^2}$$

where  $\Phi_{\text{F,ref}}$  is the quantum yield for QS (0.55<sup>1</sup>),  $F$  is the integrated area under the fluorescence spectra,  $A$  is the absorbance at the excitation wavelength,  $n$  is the refractive index of the solvent (1.346 for 0.5M H<sub>2</sub>SO<sub>4</sub>, 1.4772 for DMSO,  $n$  for the aggregates solution (DMSO/H<sub>2</sub>O = 1:1 v/v) was taken as weighted arithmetic mean with weights equal to vol% of H<sub>2</sub>O ( $n = 1.3329$ ) and DMSO in the mixture). The calculated  $\Phi_{\text{F}}$  for **3** and aggregates of **3**, were 0.0042 and 0.2437, respectively.

## S2. NMR spectra

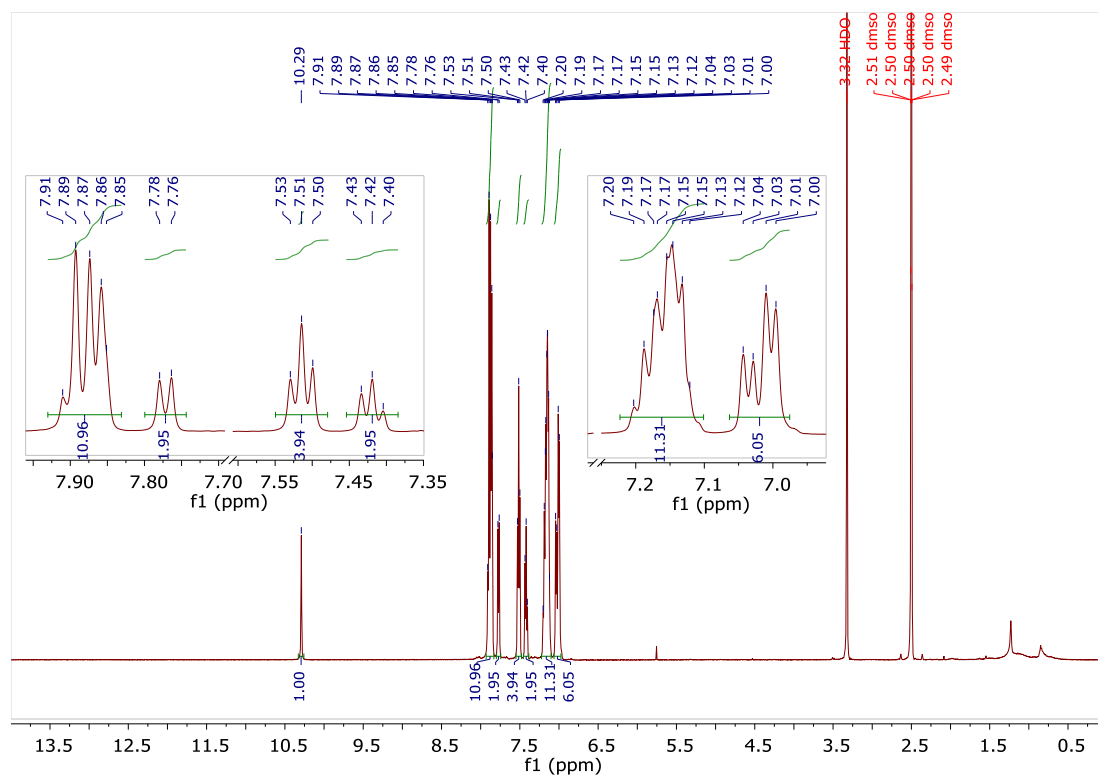

Figure S 1  $^1\text{H}$  NMR (500 MHz, DMSO- $d_6$ ) spectrum of **3**

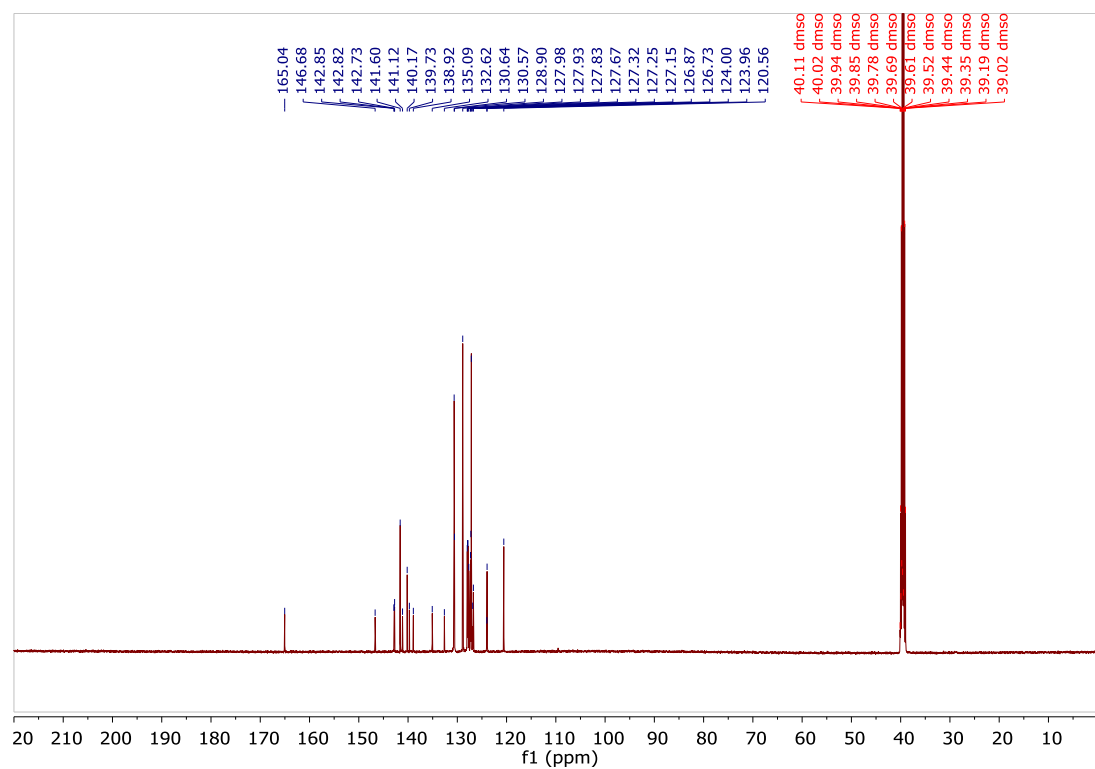

Figure S 2  $\{^1\text{H}\}^{13}\text{C}$  NMR (125 MHz, DMSO- $d_6$ ) spectrum of **3**

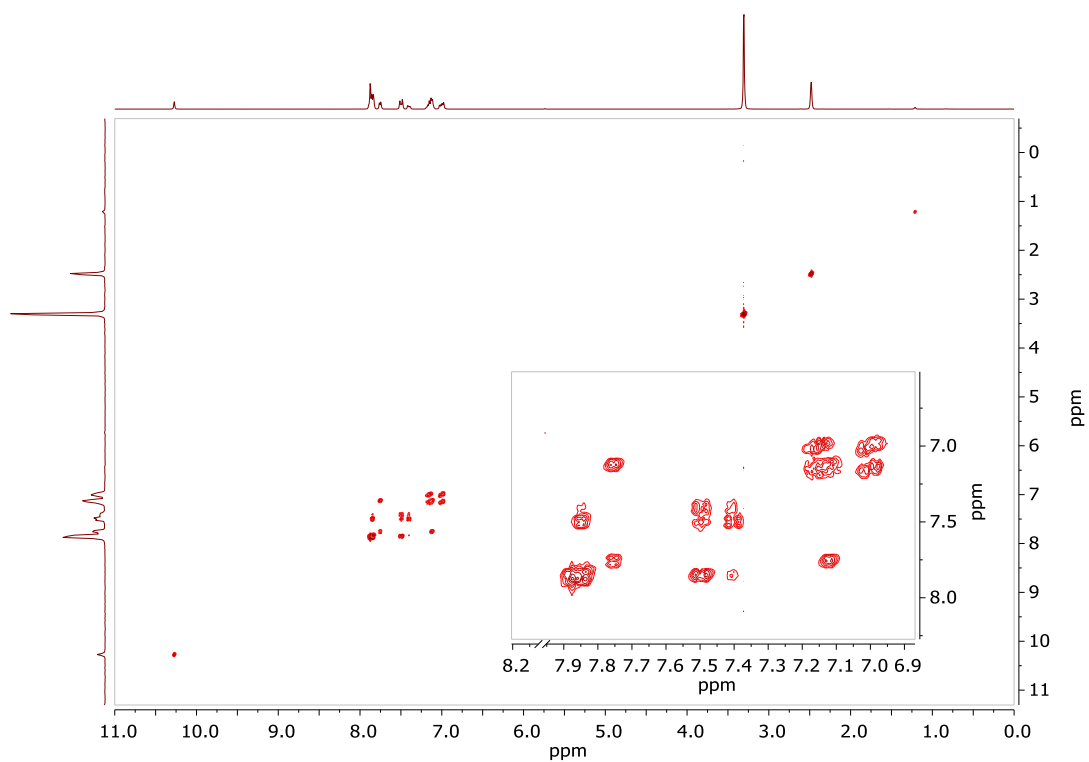

**Figure S 3**  $^1\text{H}$ - $^1\text{H}$  COSY NMR (500 MHz, DMSO- $d_6$ ) spectrum of **3**

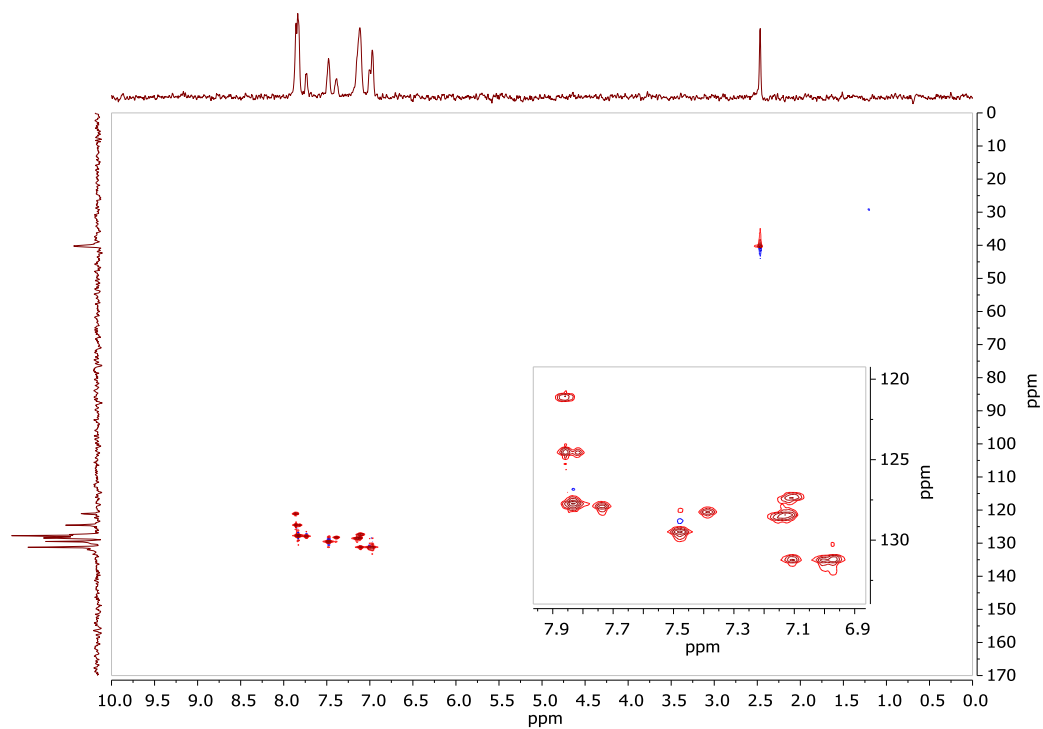

**Figure S 4**  $^1\text{H}$ - $^{13}\text{C}$  HSQC NMR (DMSO- $d_6$ ) spectrum of **3**

# S3 HRMS spectrum

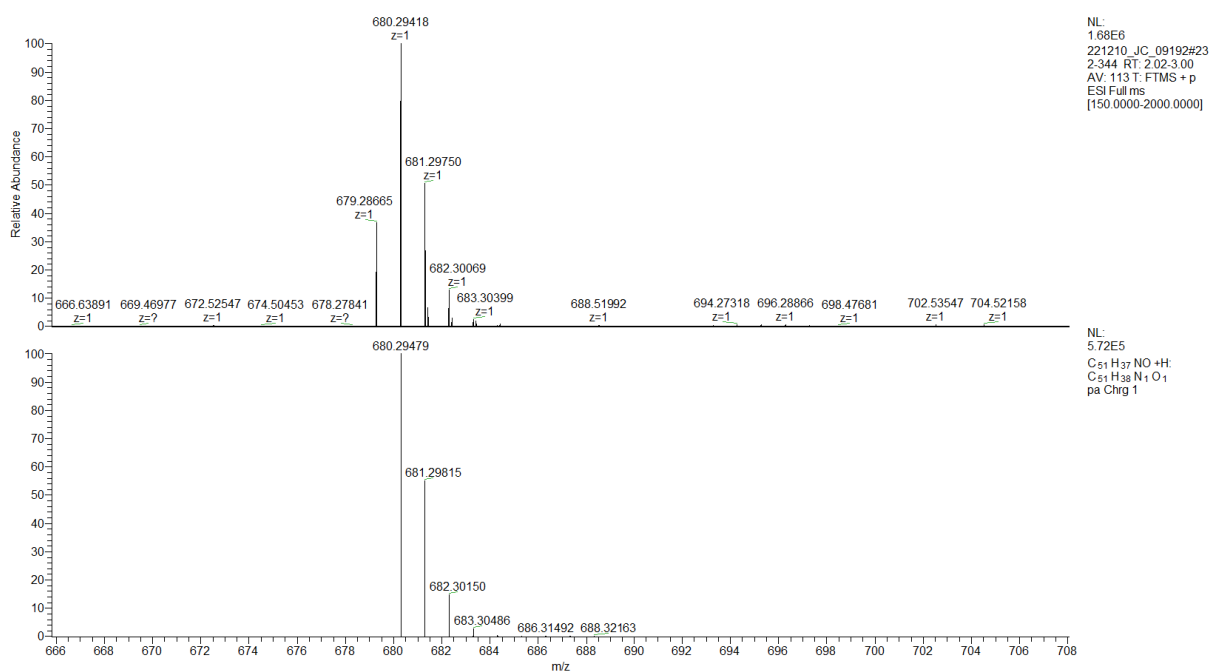

Figure S 5 ESI-HRMS (TOF) spectrum of 3

## S4. Absorption and emission spectra

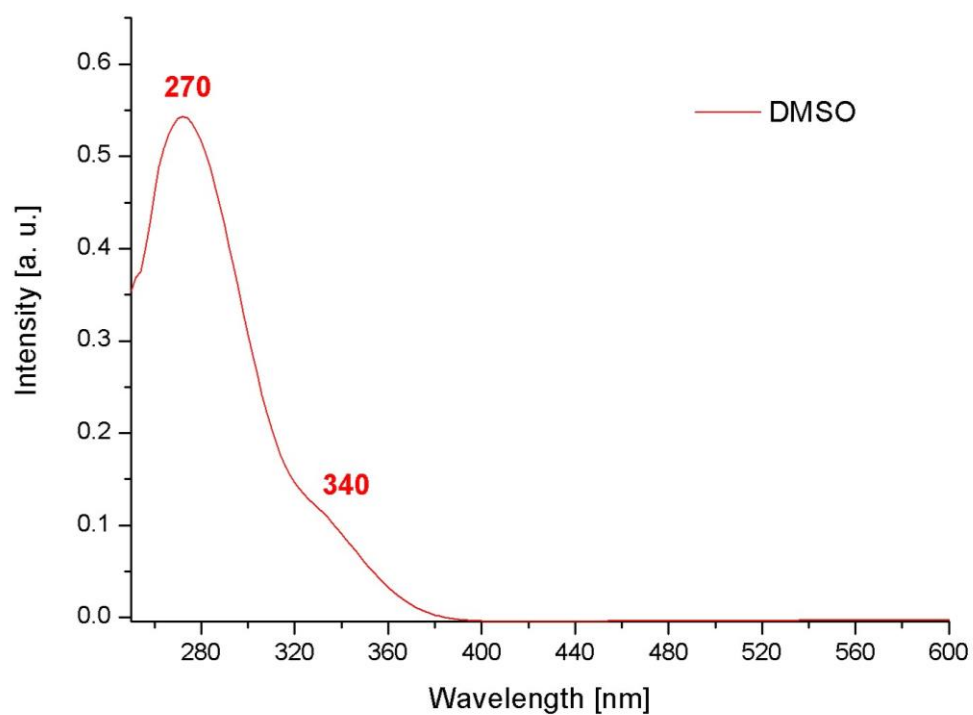

**Figure S 6** UV-vis spectrum of compound **3** (DMSO,  $C_3 = 2 \cdot 10^{-5}$  M)

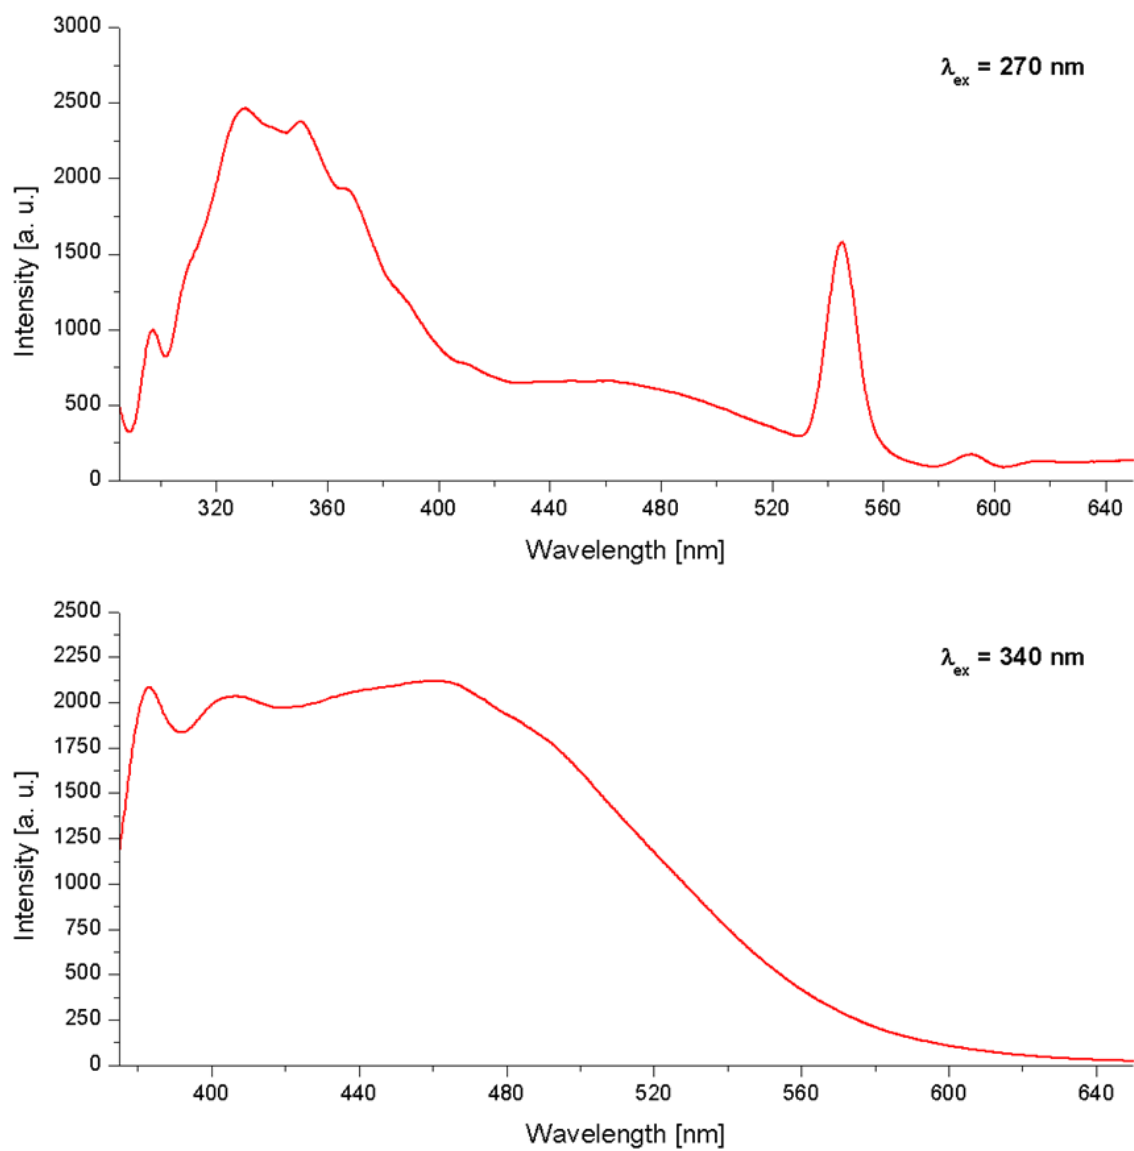

**Figure S 7** Emission spectra of **3** (DMSO,  $C_3 = 2 \cdot 10^{-5} \text{ M}$ ,  $\lambda_{\text{ex}} = 270 \text{ nm}$  (top),  $\lambda_{\text{ex}} = 340 \text{ nm}$  (bottom))

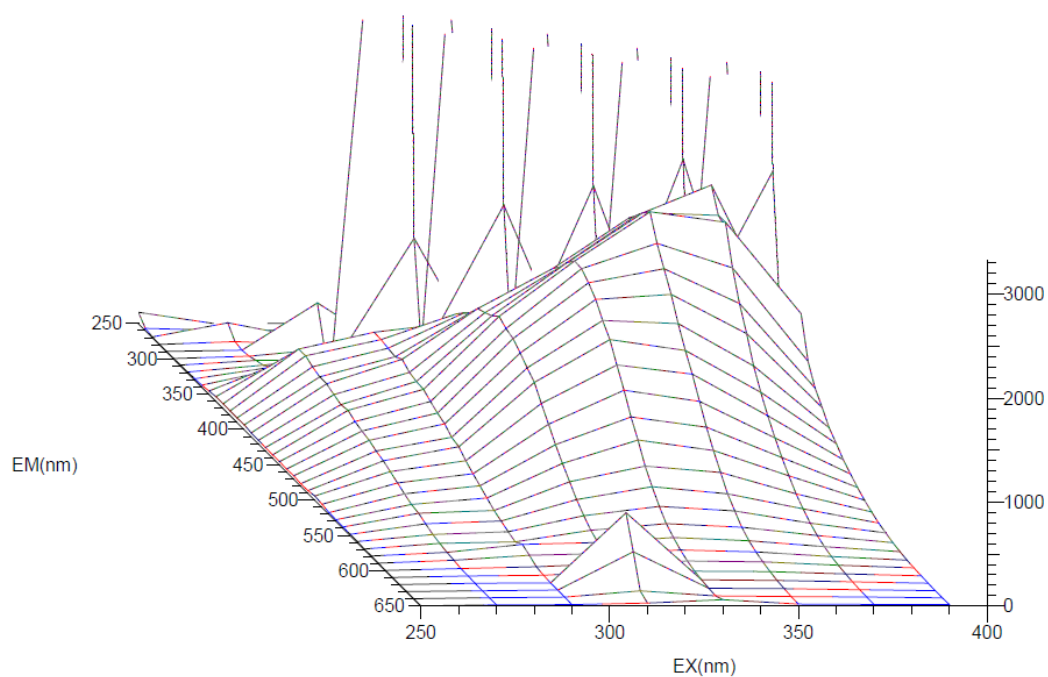

**Figure S 8** 3D emission spectrum of **3** (DMSO,  $C_3 = 2 \cdot 10^{-5}$  M)

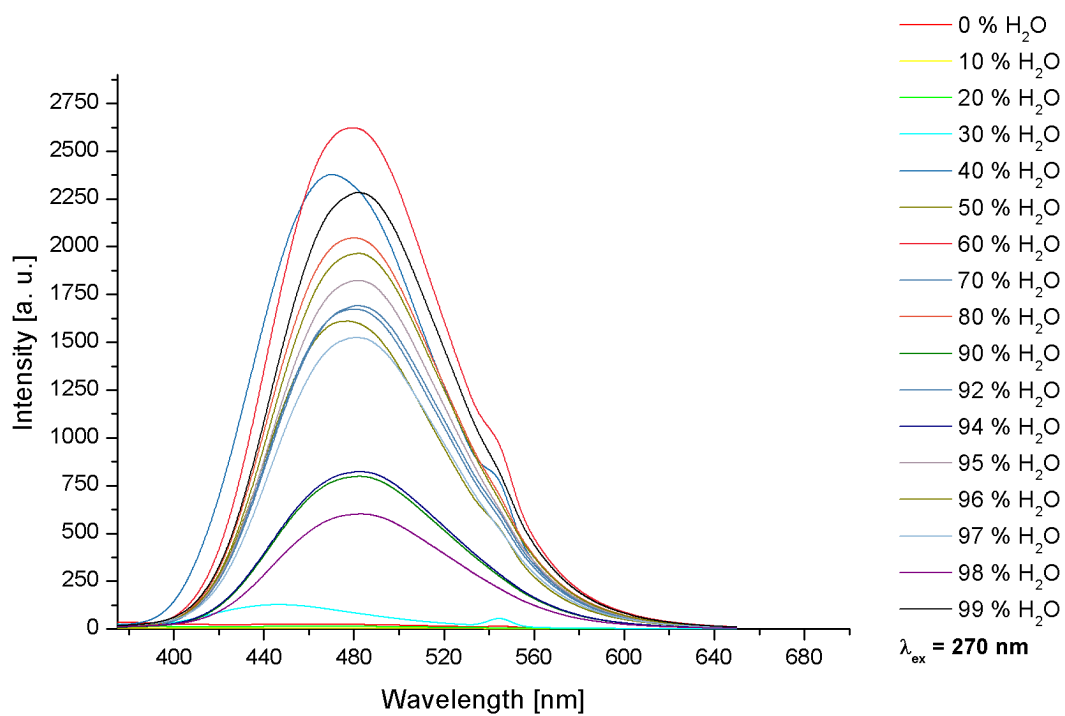

**Figure S 9** Emission spectra ( $\lambda_{ex} = 270$  nm) of compound **3** in DMSO/H<sub>2</sub>O system containing different vol% of water in the sample ( $C_3 = 2 \cdot 10^{-5}$  M,)



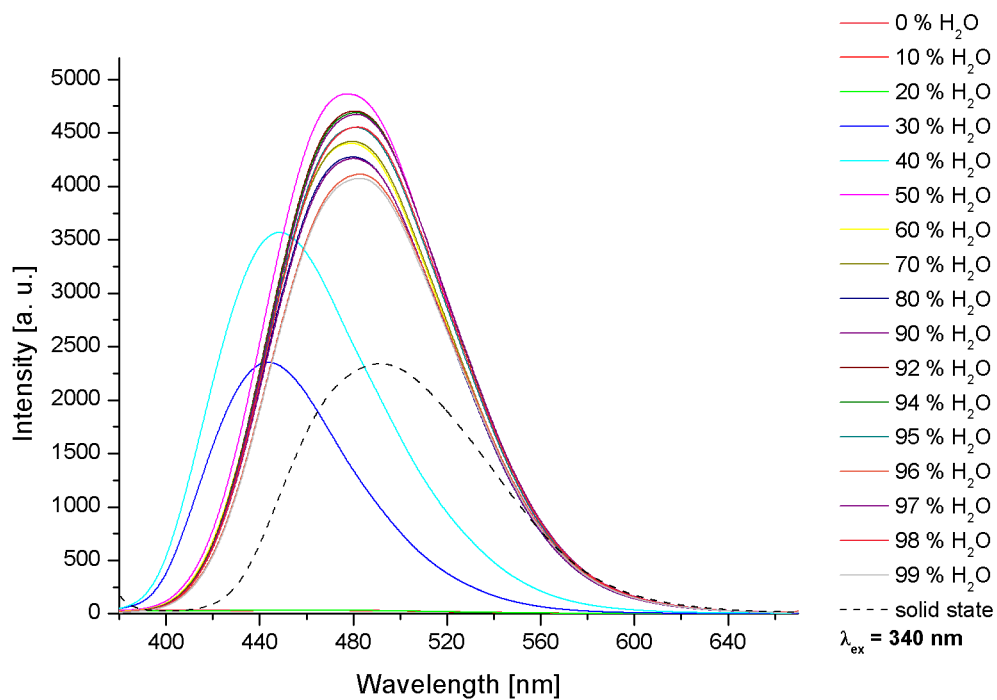

**Figure S 10** Emission spectra ( $\lambda_{ex} = 340 \text{ nm}$ ) of compound **3** in DMSO/H<sub>2</sub>O system containing different vol% of water in the sample ( $C_3 = 2 \cdot 10^{-5} \text{ M}$ )

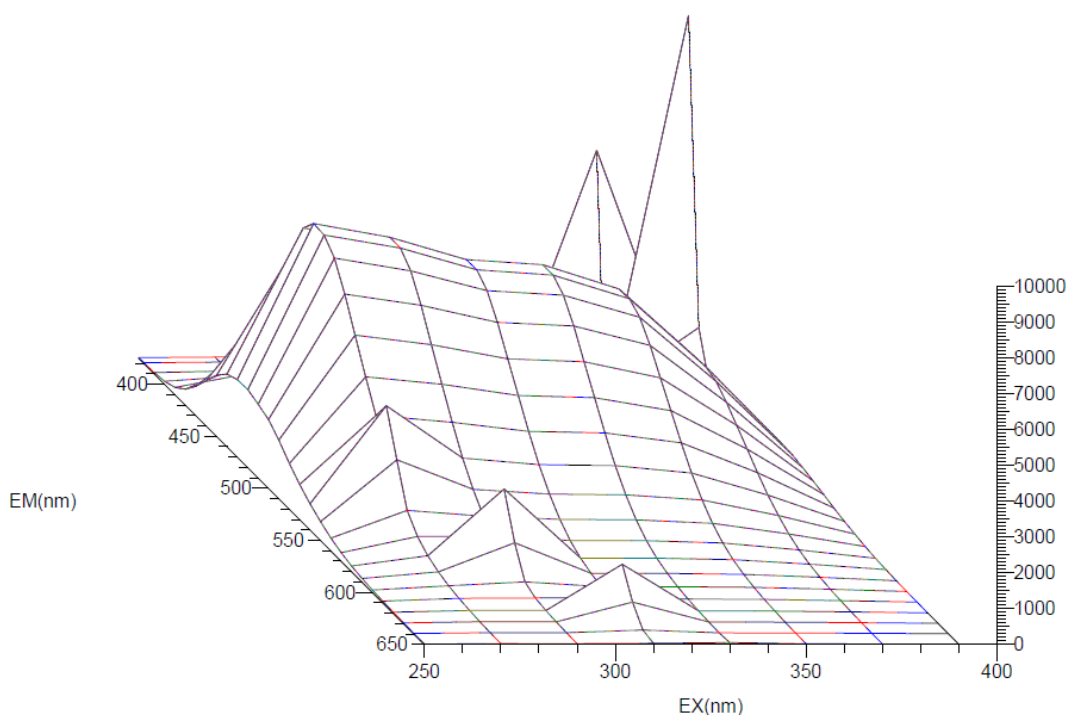

**Figure S 11** 3D emission spectra of **3** (DMSO/H<sub>2</sub>O = 1:1 v/v,  $C_3 = 2 \cdot 10^{-5} \text{ M}$ )

## S5. Anions binding experiments

For anions for which a decrease in emission intensity was observed ( $I^-$ ,  $HSO_4^-$ ,  $BF_4^-$ ,  $H_2PO_4^-$ ,  $CN^-$ , AMP, ADP, ATP, NADP, FAD) the Stern-Volmer constant values ( $K_{SV}$ ) were estimated using the Stern-Volmer method, given by the equation:

$$\frac{I_0}{I} = 1 + K_{SV}$$

where  $I_0$  and  $I$  are the fluorescence intensities of **3** in the absence and presence of given anion, respectively.  $K_{SV}$  were taken as slope of  $1/I$  vs.  $1/I_0$  linear plots.

The limit of detection (LOD) values were estimated from the plot: of  $(I - I_{min}) / (I_{max} - I_{min})$  vs  $\text{Log}([A^-])$ .

For  $ClO_4^-$  where an increase in emission intensity was observed the apparent binding constant ( $K_{app}$ ) values were estimated using the Benesi-Hildebrand <sup>4,5</sup> method, given by the equation:

$$\frac{1}{I - I_0} = \frac{1}{a} + \frac{1}{a \cdot K_{app} \cdot C(A^-)}$$

where  $I_0$  and  $I$  are the fluorescence intensities of **3** in the absence and presence of given anion, respectively,  $a$  is a constant, and  $C(A^-)$  is the concentration of given anion in solution.  $K_{app}$  were determined as a ratio of intercept-to-slope of  $1/(I - I_0)$  vs.  $1/C(A^-)$  linear plots.

The data (for the estimation of  $K_{app}$  for the studied systems were collected from emission maxima ( $\lambda_{em}$ ) = 496 nm ( $\lambda_{ex}$  = 270 nm).

The limit of detection (LOD) values were estimated by the equation:

$$LOD = 3S/b$$

Where S is standard error of intercept, and b is slope of regression line

The stoichiometry of the complexes formed was estimated using Job's plot method, from the plot:  $(1 - x) \cdot (\delta - \delta_0)$  vs  $x$ . The  $x$  stands from the mole fraction of nucleotide. The expected stoichiometry is indicated by the maximum on the plot.

All the spectra and plots are presented below.

## S5.1 $^1\text{H}$ NMR spectroscopy

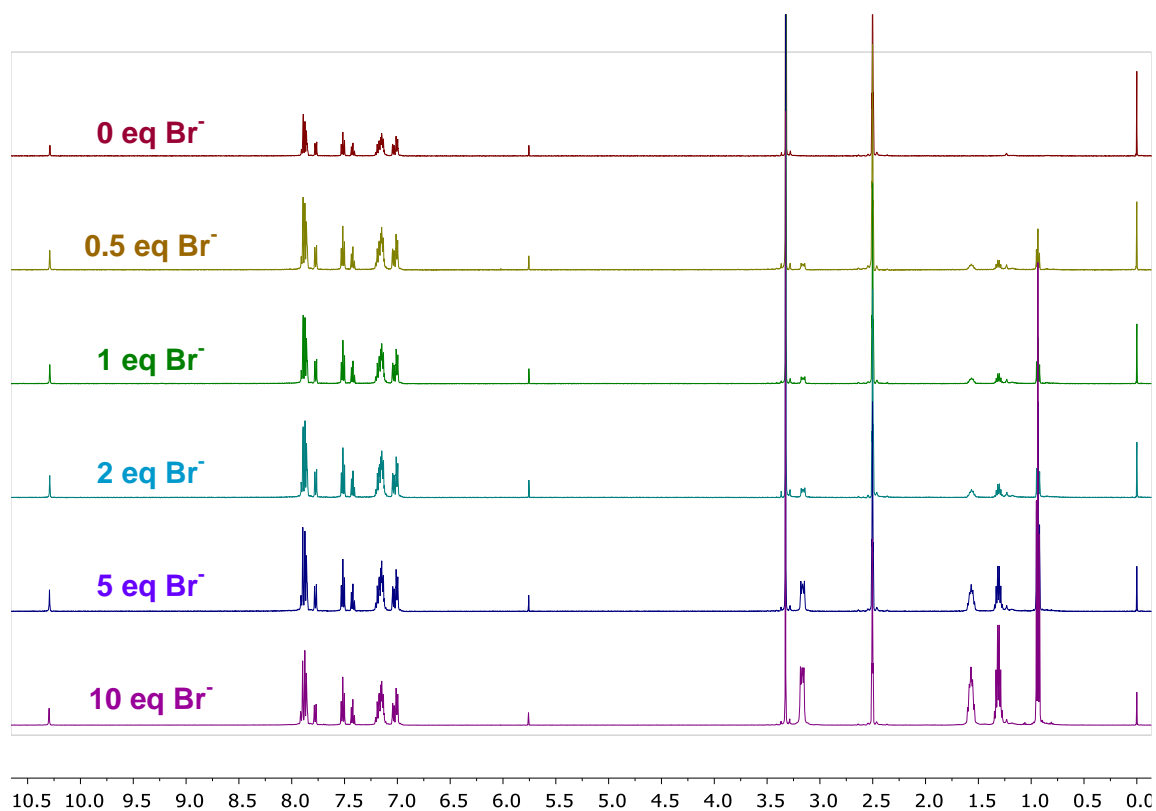

**Figure S 12**  $^1\text{H}$  NMR (500 MHz,  $\text{DMSO-d}_6$ ) spectrum of **3** in presence of various molar equivalents of  $\text{Br}^-$

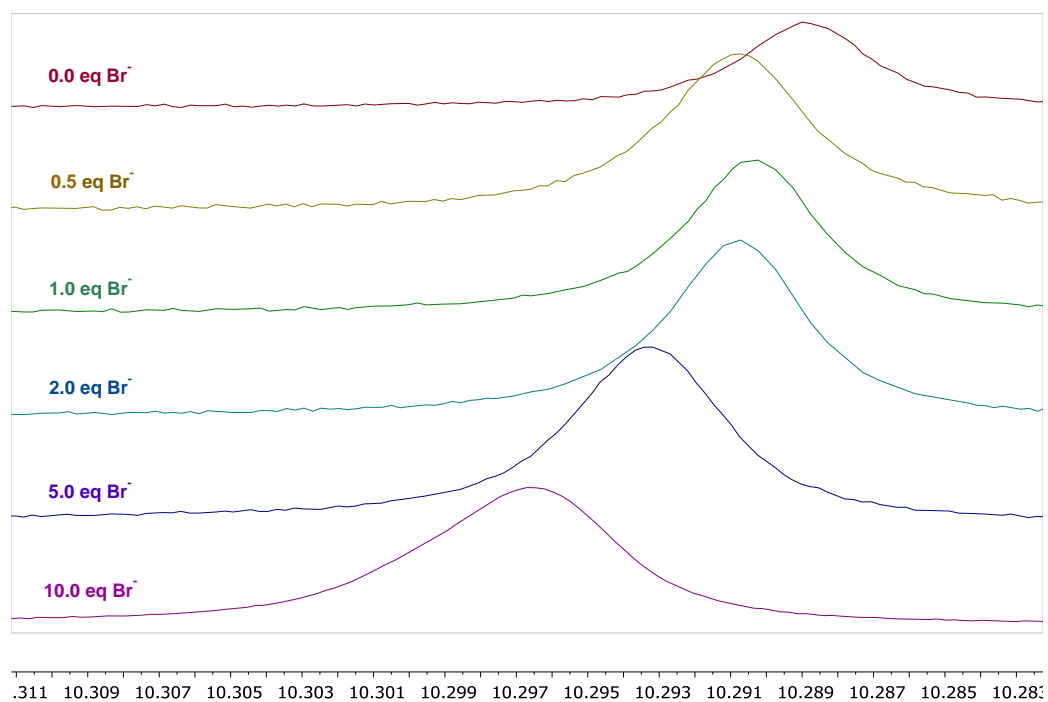

**Figure S 13** Inset of the  $^1\text{H}$  NMR (500 MHz,  $\text{DMSO-d}_6$ ) spectrum of **3** in presence of various molar equivalents of  $\text{Br}^-$

Signals on the  $^1\text{H}$  NMR spectra were assigned according to the literature data<sup>6</sup>.

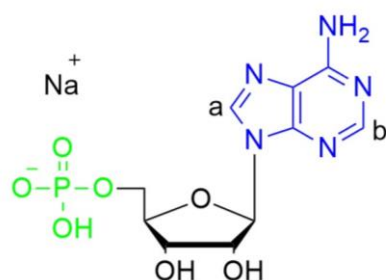

**Figure S 14** Chemical formula of adenosine monophosphate (**AMP**) with the marked protons (a, b) for which the shifts of signals were observed in the  $^1\text{H}$  NMR spectrum

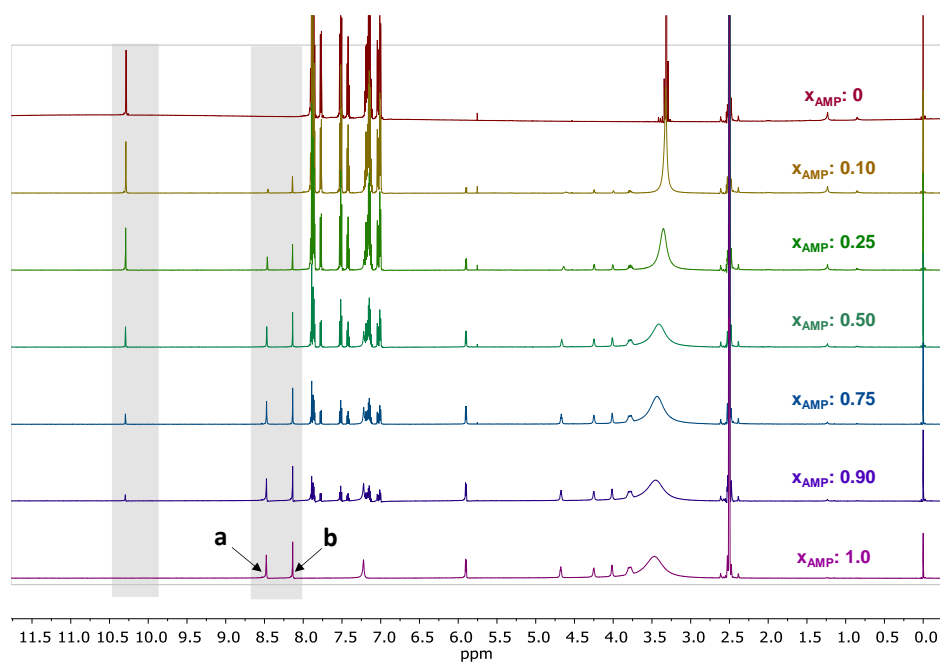

**Figure S 15**  $^1\text{H}$  NMR (500 MHz,  $\text{DMSO-}d_6$ ) spectrum of **3** in presence of various molar equivalents of **AMP** (grey colour indicates signals that are shifted)

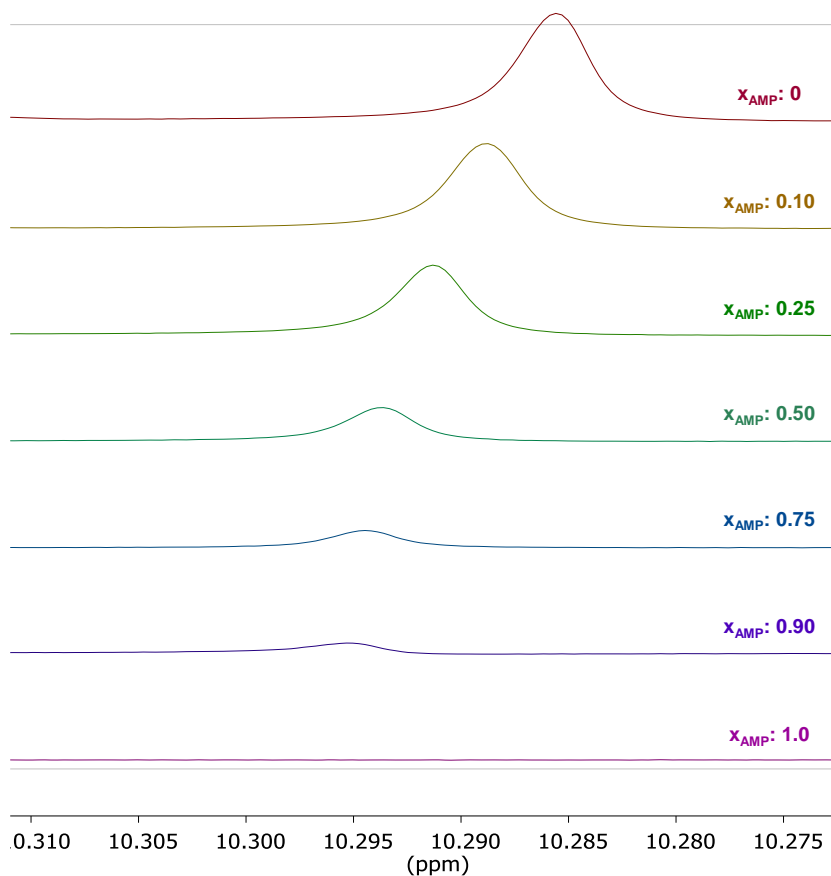

**Figure S 16** Insets of the  $^1\text{H}$  NMR (500 MHz,  $\text{DMSO-}d_6$ ) spectrum of **3** in presence of various molar equivalents of **AMP**

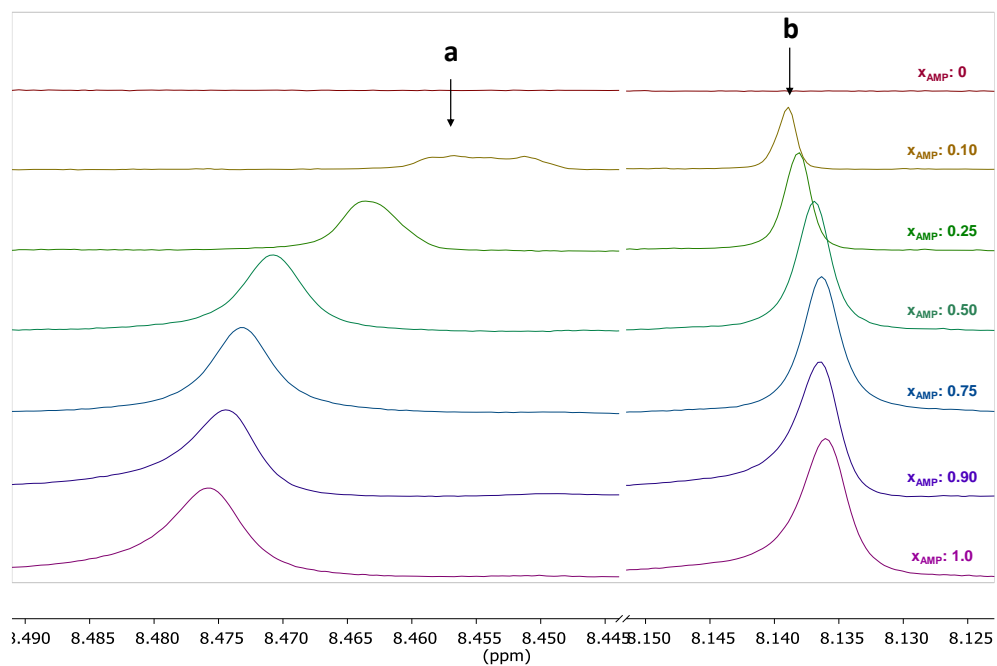

**Figure S 17** Insets of the  $^1\text{H}$  NMR (500 MHz,  $\text{DMSO-}d_6$ ) spectrum of **3** in presence of various molar equivalents of **AMP** (amplification of the shifted proton signals of the nucleobase of the nucleotide)

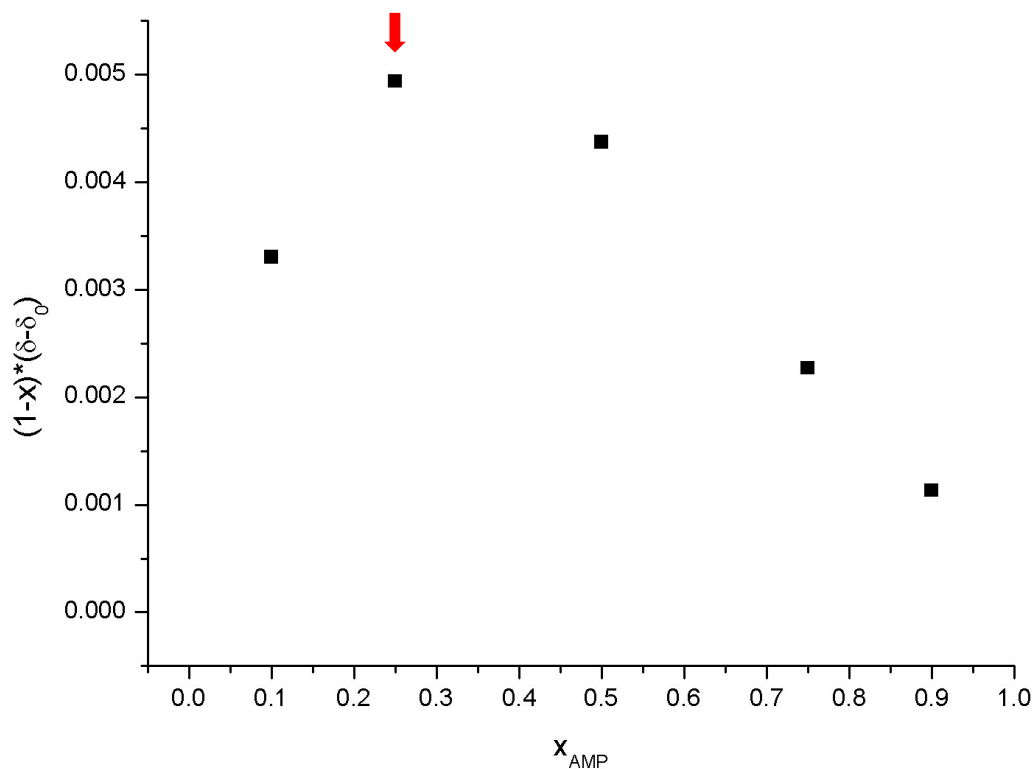

**Figure S 18** Job's plot regarding the interactions between **3** and **AMP** (the red arrow indicates the estimated stoichiometry of the complex formed)

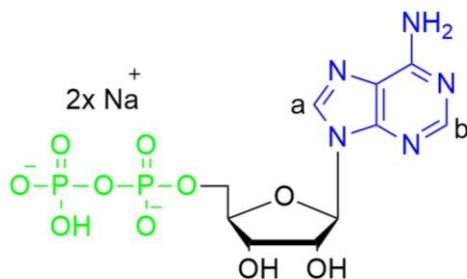

**Figure S 19** Chemical formula of adenosine diphosphate (**ADP**) with the marked protons (a, b), whose signals are shifted in the  $^1\text{H}$  NMR spectrum

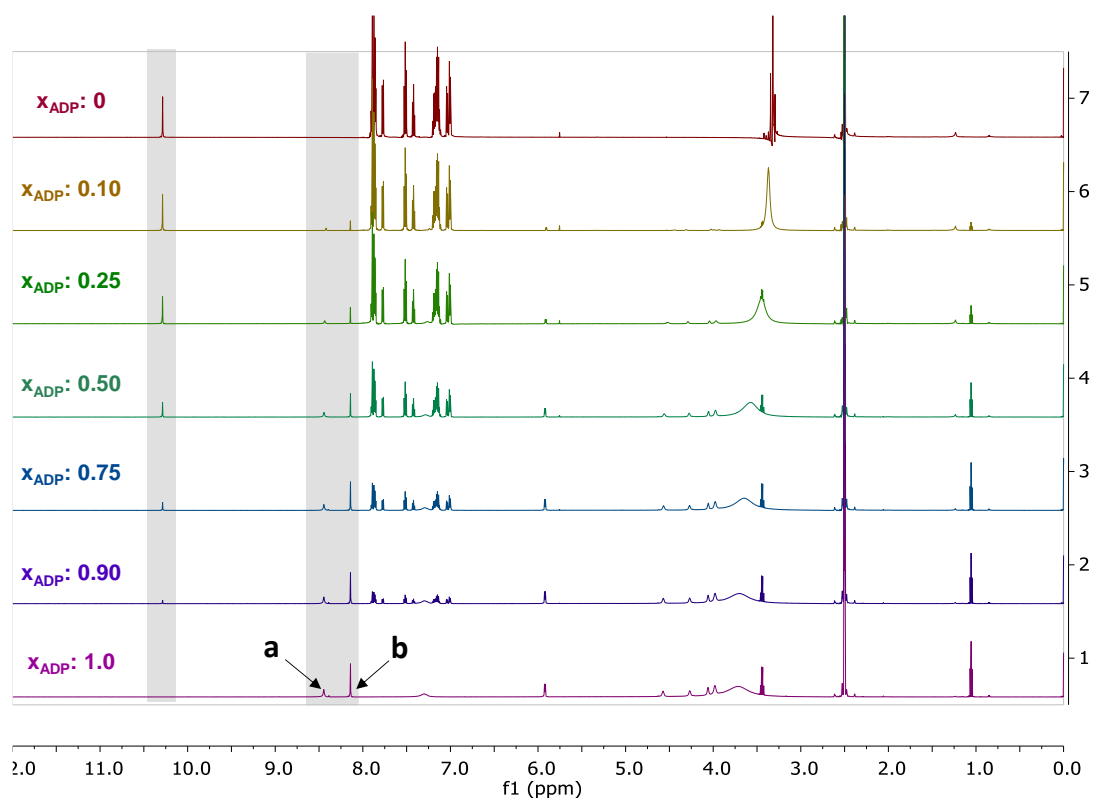

**Figure S 20**  $^1\text{H}$  NMR (500 MHz,  $\text{DMSO-}d_6$ ) spectrum of **3** in presence of various molar equivalents of **ADP** (grey colour indicates signals that are shifted)

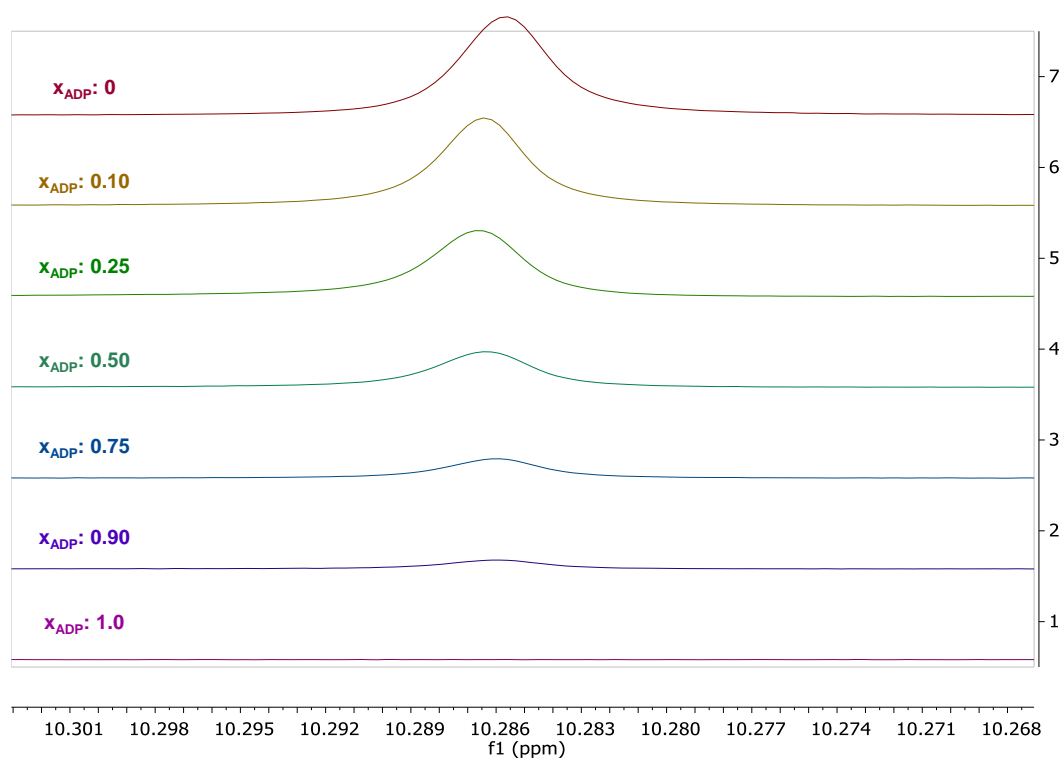

**Figure S 21** Insets of the  $^1\text{H}$  NMR (500 MHz,  $\text{DMSO-}d_6$ ) spectrum of **3** in presence of various molar equivalents of **ADP** (amplification of the shifted proton signals of the amide group)

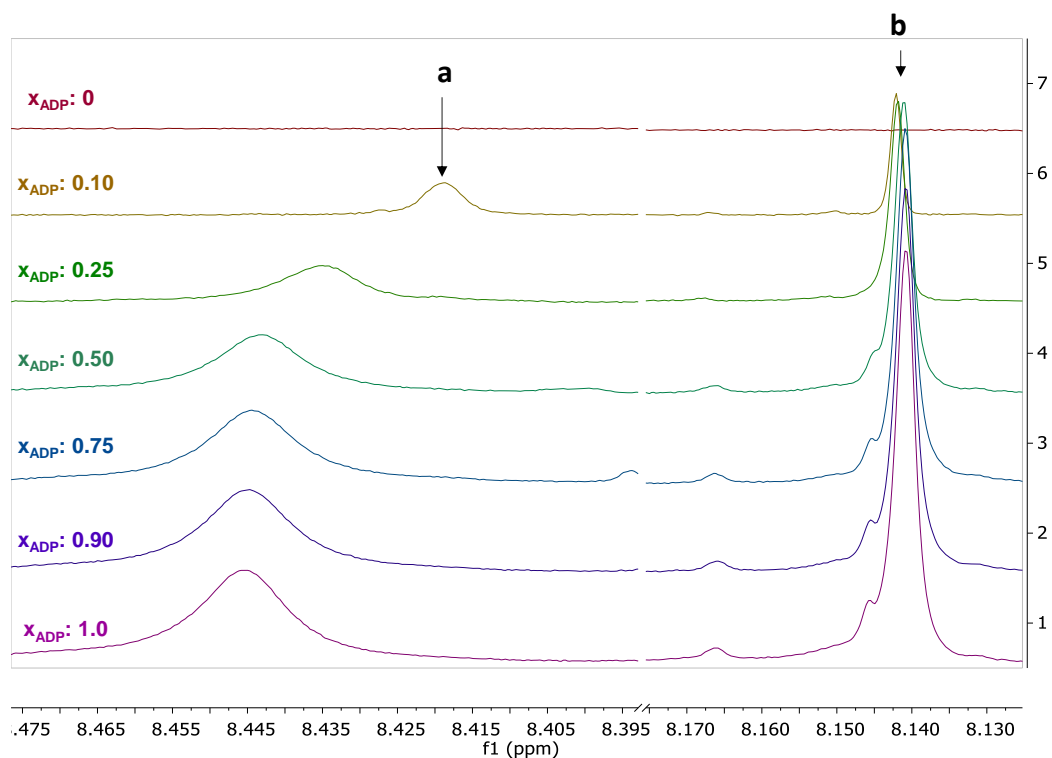

**Figure S 22** Insets of the  $^1\text{H}$  NMR (500 MHz,  $\text{DMSO-}d_6$ ) spectrum of **3** in presence of various molar equivalents of **ADP** (amplification of the shifted proton signals of the nucleobase of the nucleotide)

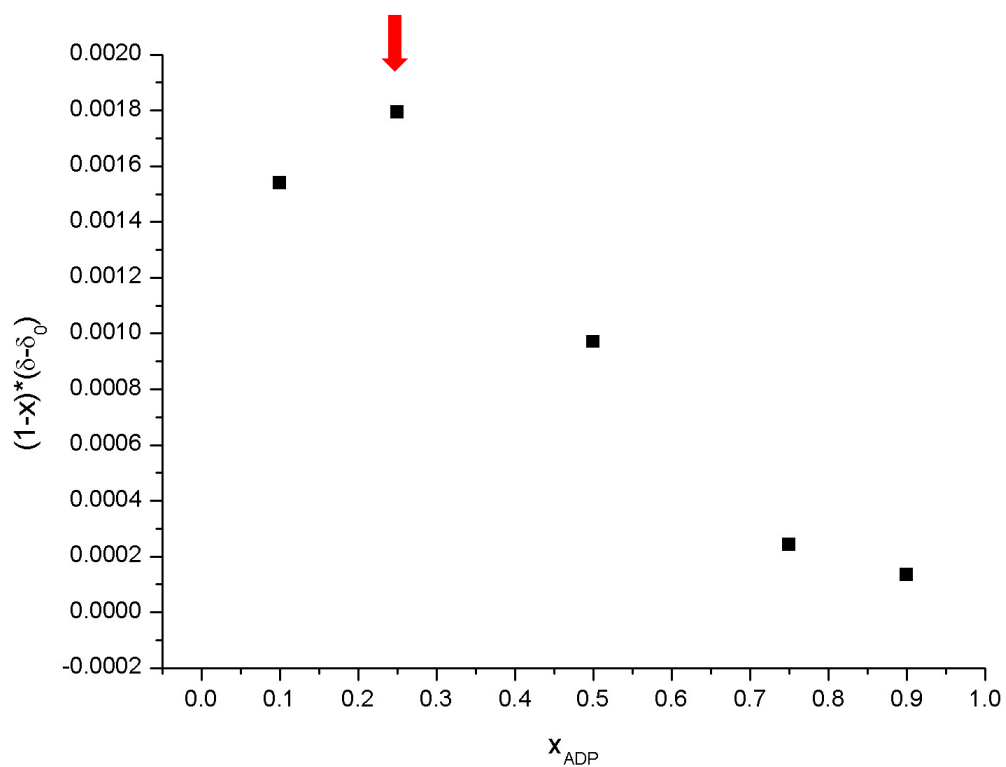

**Figure S 23** Job's plot regarding the interactions between **3** and **ADP** (the red arrow indicates the estimated stoichiometry of the complex formed)



## S5.2 Emission spectra

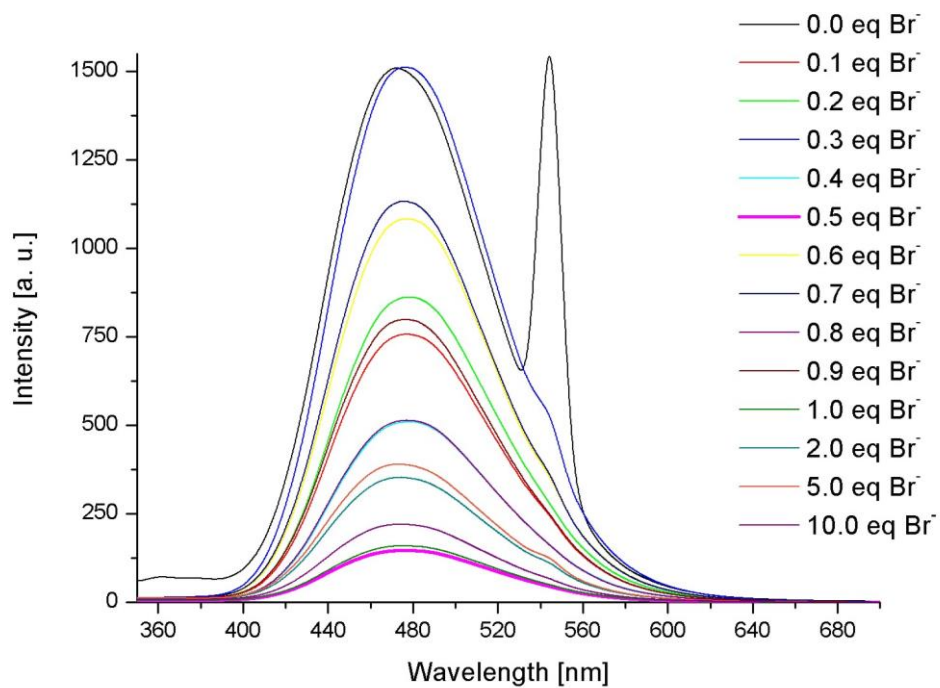

**Figure S 24** Emission spectra of **3** in the presence of various molar equivalents of Br<sup>-</sup> (DMSO/H<sub>2</sub>O 1:1 v/v, C<sub>3</sub> = 2·10<sup>-5</sup> M, λ<sub>ex</sub> = 270 nm).

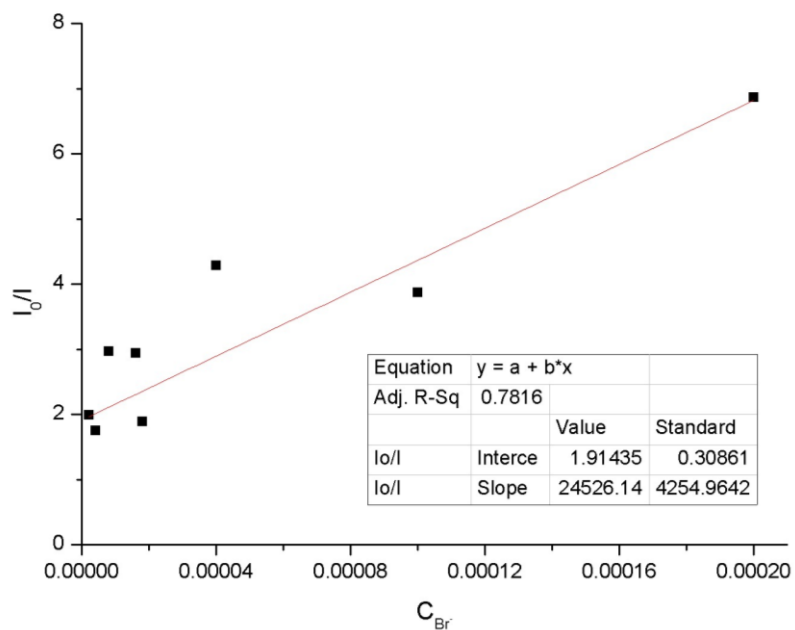

**Figure S 25** Stern-Volmer plot regarding the interactions between **3** and  $\text{Br}^-$ . The data for the linear plot are also presented.

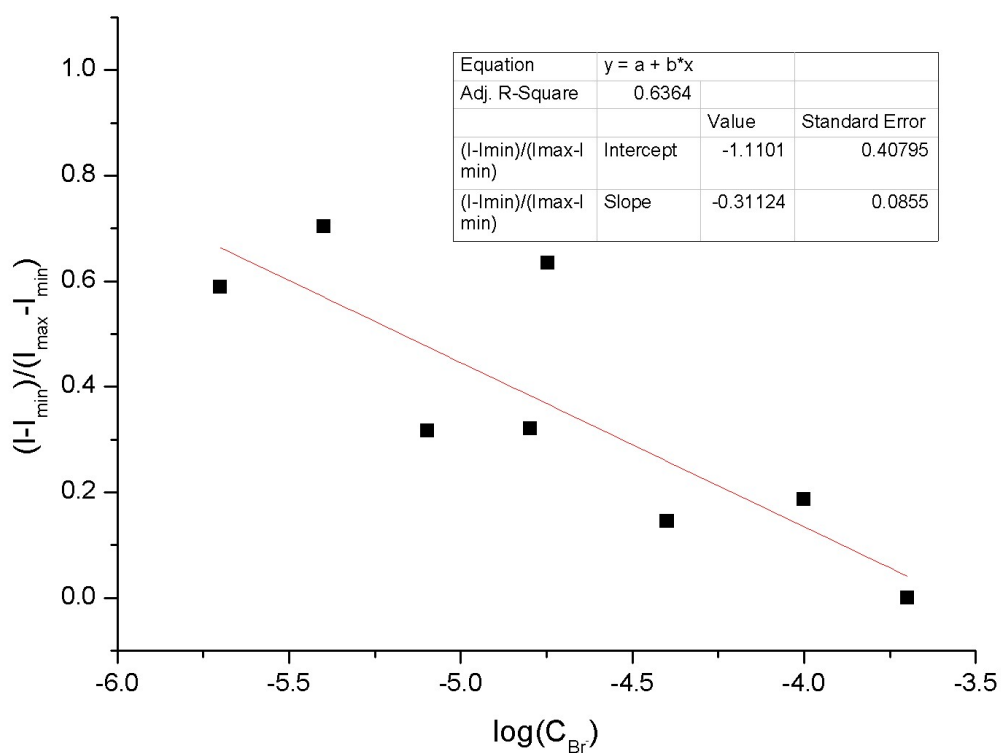

**Figure S 26** Plot for  $(I - I_{\text{min}})/(I_{\text{max}} - I_{\text{min}})$  versus  $\log(C_{\text{Br}^-})$  of the interactions between **3** and  $\text{Br}^-$ . The data for the linear plot are also presented.

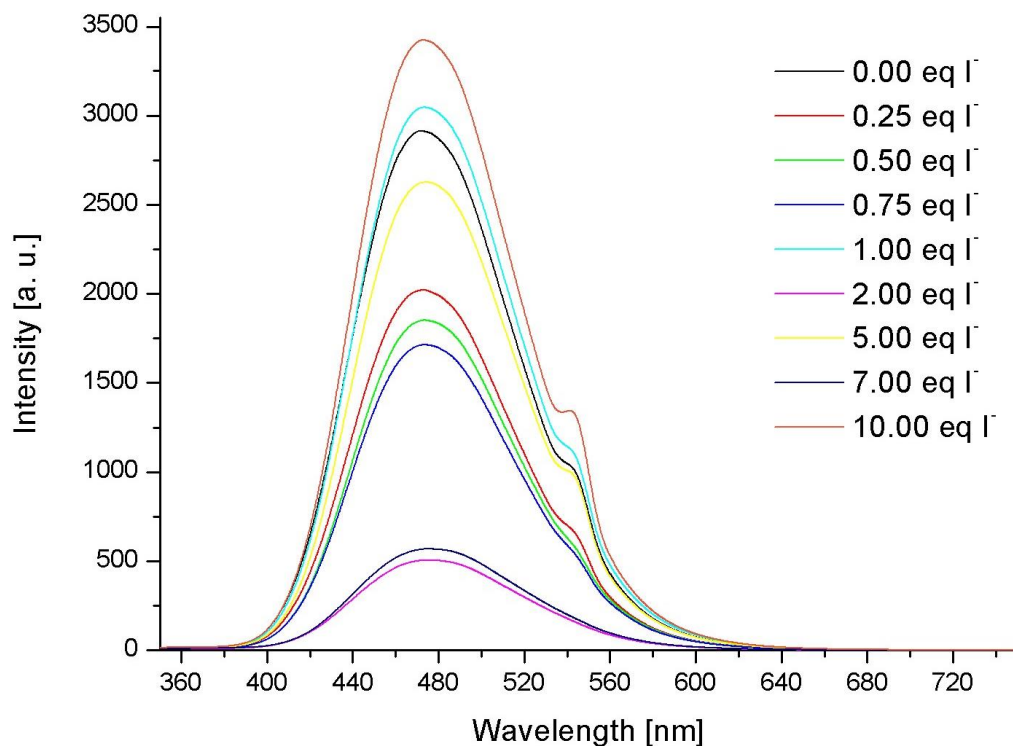

**Figure S 27** Emission spectra of **3** in the presence of various molar equivalents of  $I^-$  (DMSO/H<sub>2</sub>O 1:1 v/v,  $C_3 = 2 \cdot 10^{-5}$  M,  $\lambda_{ex} = 270$  nm).

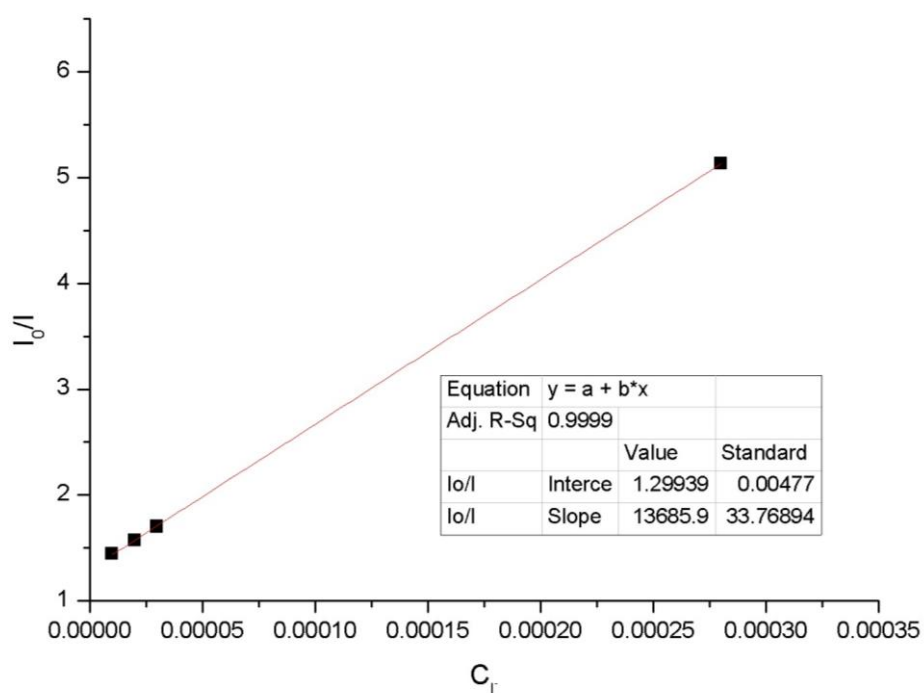

**Figure S 28** Stern-Volmer plot regarding the interactions between **3** and  $I^-$ . The data for the linear plot are also presented.

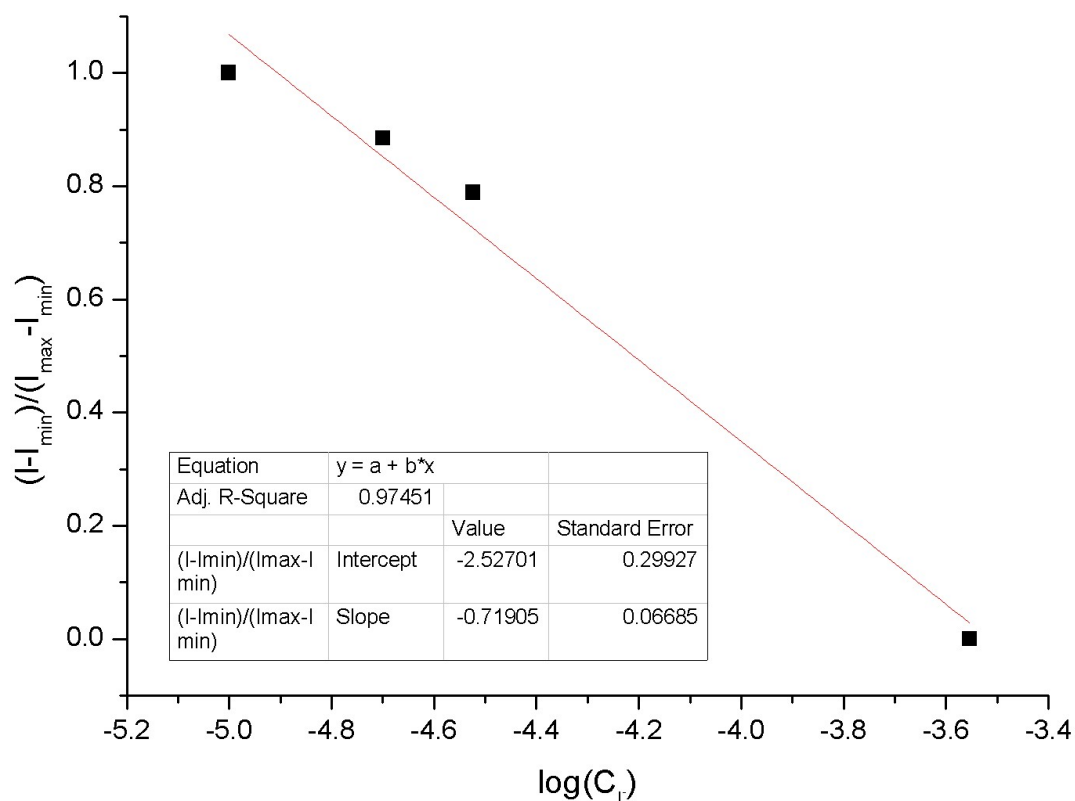

**Figure S 29** Plot for  $(I-I_{\min})/(I_{\max}-I_{\min})$  versus  $\log(C_1)$  regarding the interactions between **3** and  $\Gamma$ . The data for the linear plot are also presented.

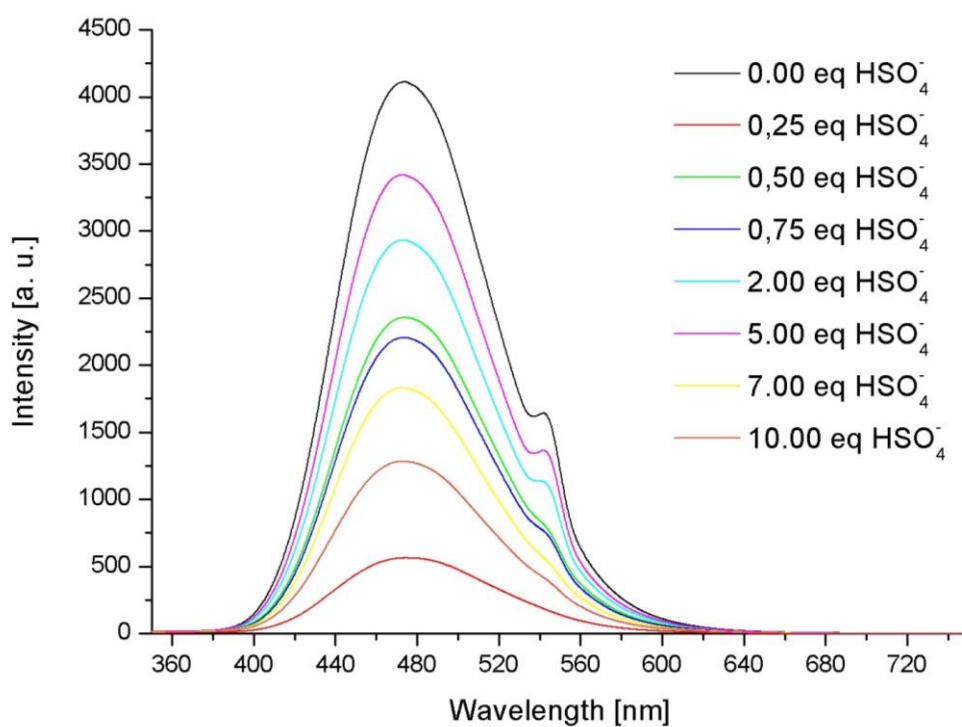

**Figure S 30** Emission spectra of **3** in the presence of various molar equivalents of  $\text{HSO}_4^-$  (DMSO/H<sub>2</sub>O 1:1 v/v,  $C_3 = 2 \cdot 10^{-5}$  M,  $\lambda_{\text{ex}} = 270$  nm).

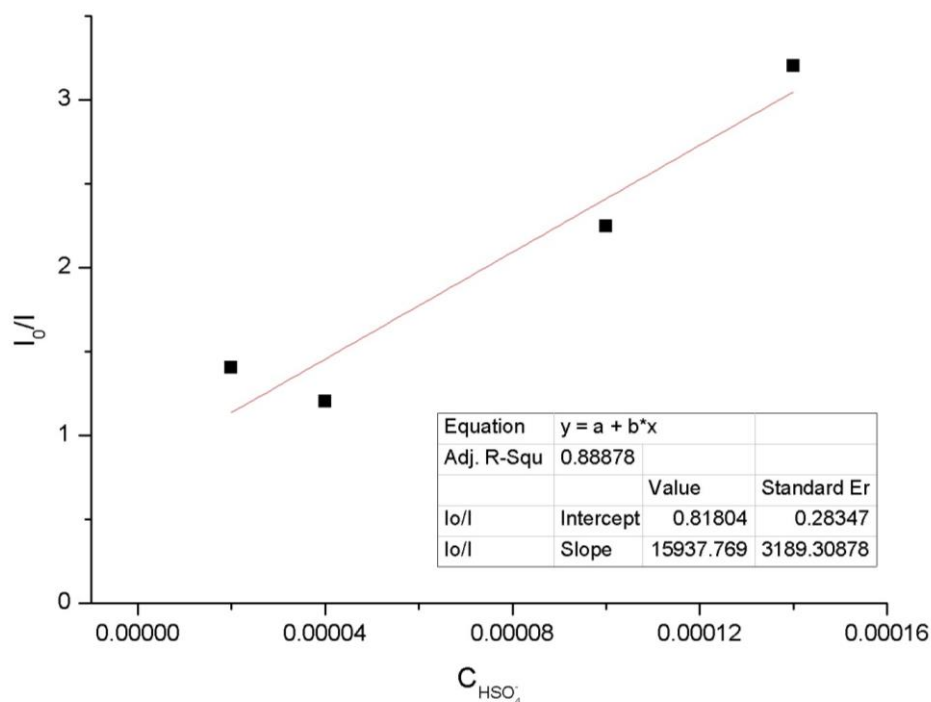

**Figure S 31** Stern-Volmer plot regarding the interactions between **3** and  $\text{HSO}_4^-$ . The data for the linear plot are also presented.

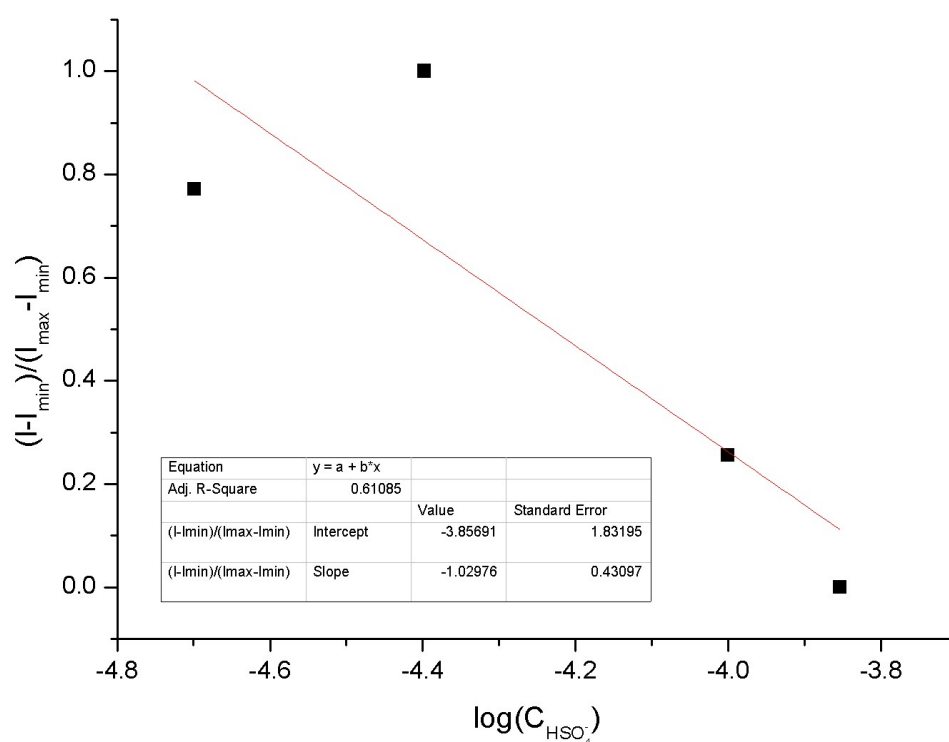

**Figure S 32** Plot for  $(I - I_{\min}) / (I_{\max} - I_{\min})$  versus  $\log(C_{\text{HSO}_4^-})$  regarding the interactions between **3** and  $\text{HSO}_4^-$ . The data for the linear plot are also presented.

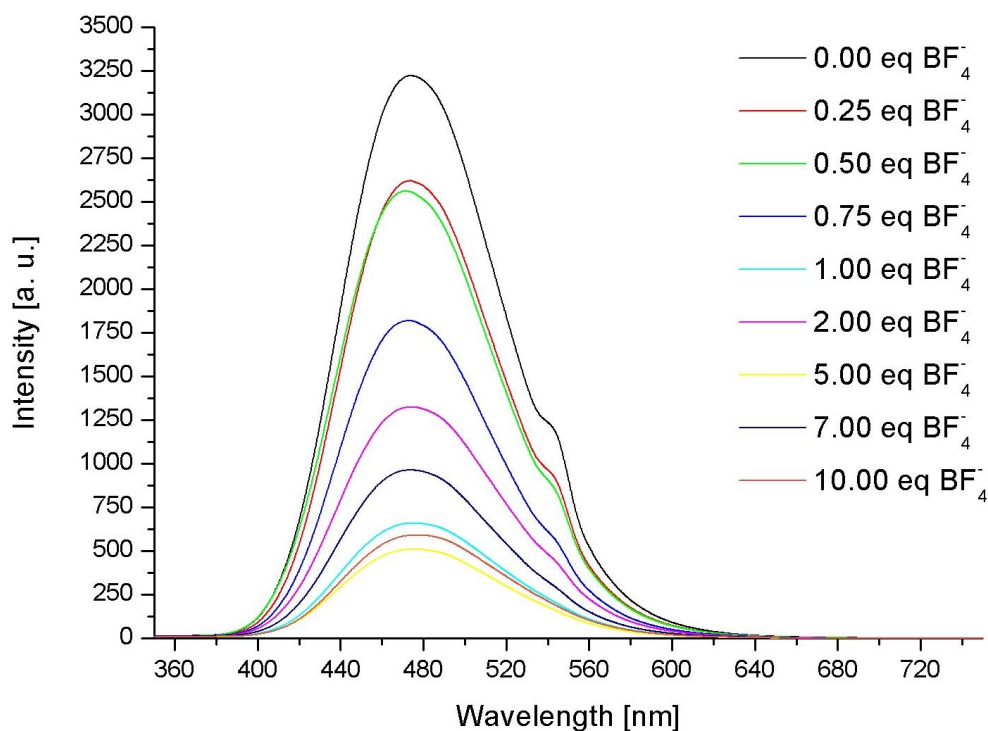

**Figure S 33** Emission spectra of **3** in the presence of various molar equivalents of  $\text{BF}_4^-$  (DMSO/ $\text{H}_2\text{O}$  1:1 v/v,  $C_3 = 2 \cdot 10^{-5}$  M,  $\lambda_{\text{ex}} = 270$  nm).

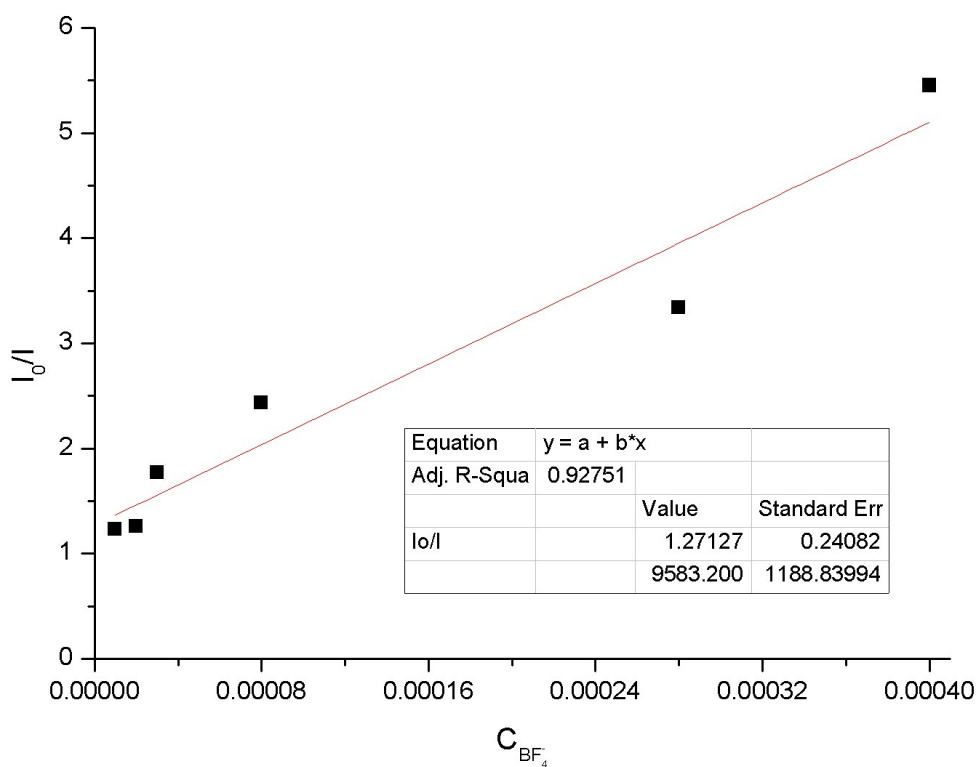

**Figure S 34** Stern-Volmer plot regarding the interactions between **3** and  $\text{BF}_4^-$ . The data for the linear plot are also presented.

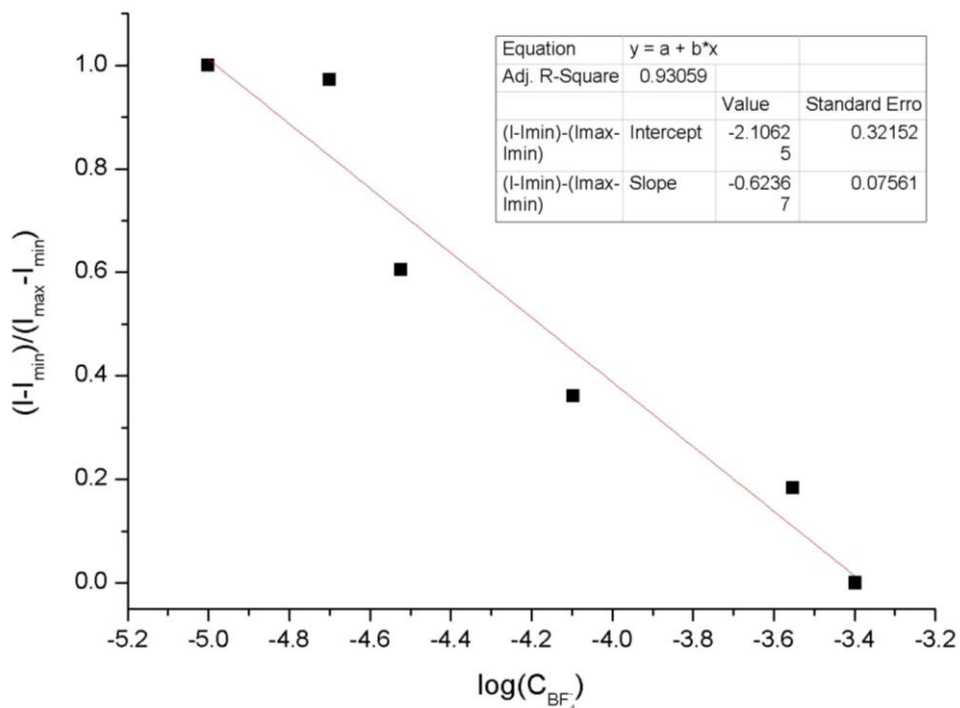

**Figure S 35** Plot for  $(I-I_{\min})/(I_{\max}-I_{\min})$  versus  $\log(C_{\text{BF}_4^-})$  regarding the interactions between **3** and  $\text{BF}_4^-$ . The data for the linear plot are also presented.

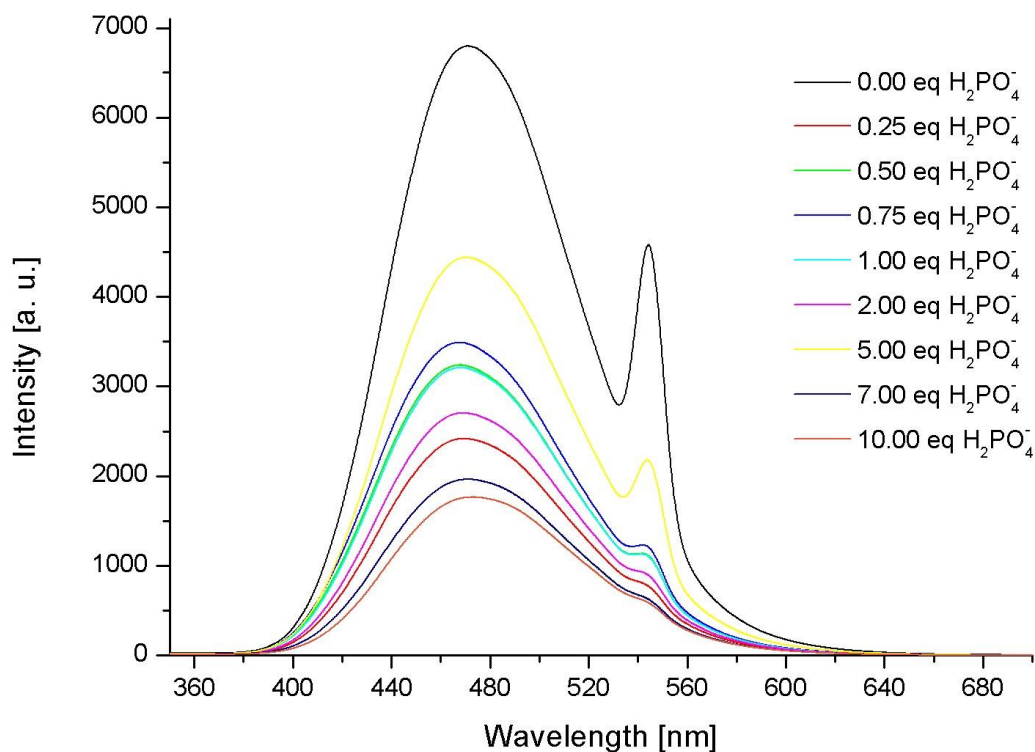

**Figure S 36** Emission spectra of **3** in the presence of various molar equivalents of  $\text{H}_2\text{PO}_4^-$  (DMSO/ $\text{H}_2\text{O}$  1:1 v/v,  $C_3 = 2 \cdot 10^{-5}$  M,  $\lambda_{\text{ex}} = 270$  nm).

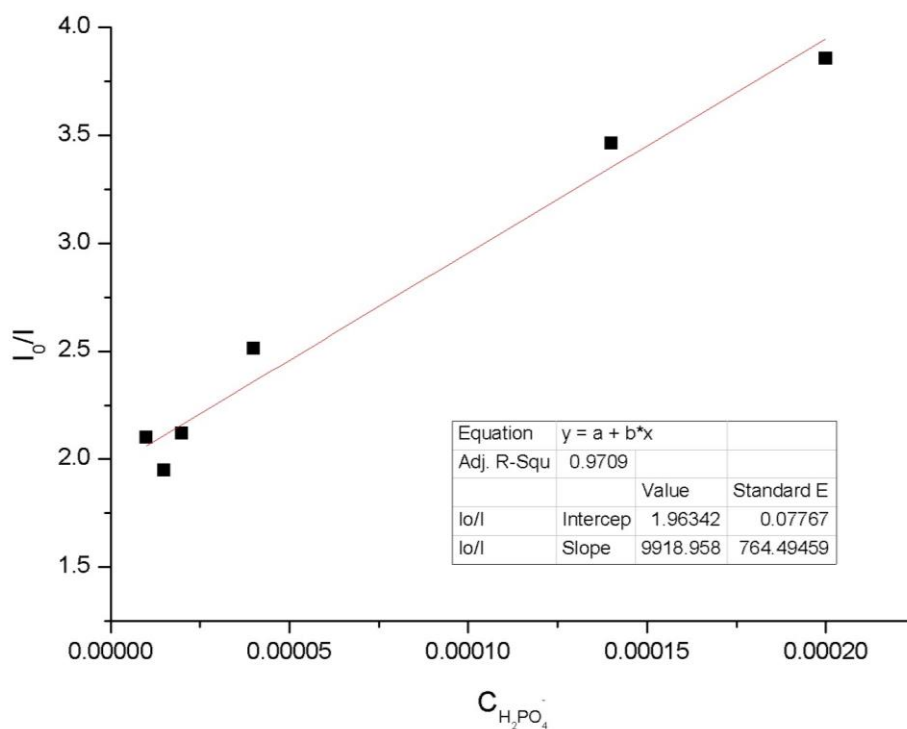

**Figure S 37** Stern-Volmer plot regarding the interactions between **3** and  $\text{H}_2\text{PO}_4^-$ . The data for the linear plot are also presented.

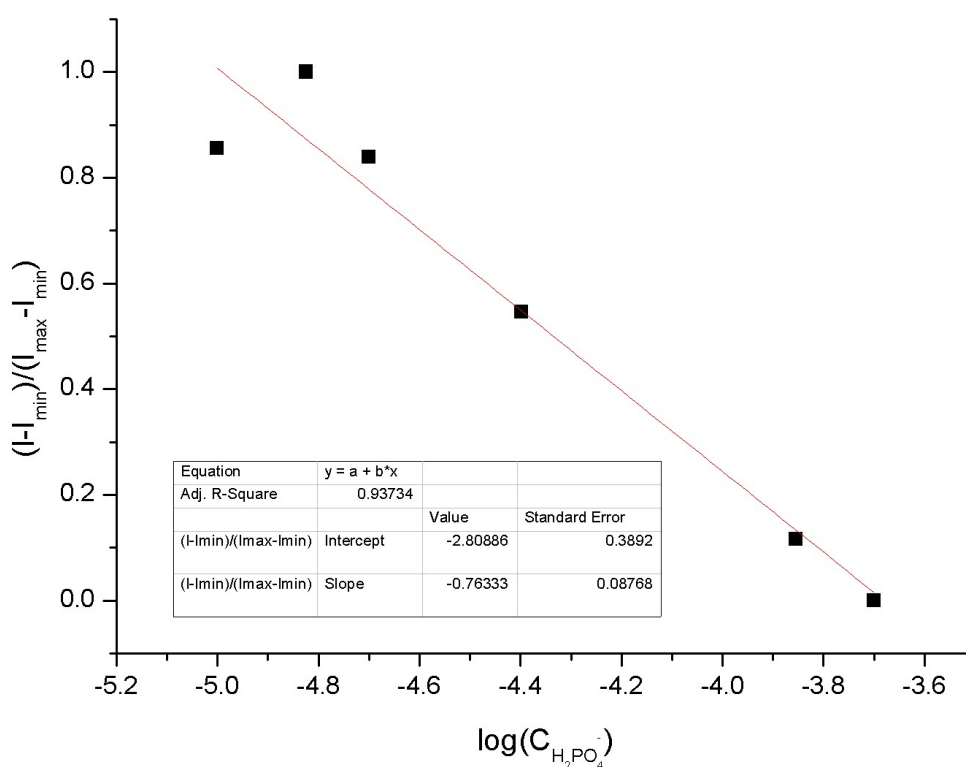

**Figure S 38** Plot for  $(I - I_{\min}) / (I_{\max} - I_{\min})$  versus  $\log(C_{\text{H}_2\text{PO}_4^-})$  regarding the interactions between **3** and  $\text{H}_2\text{PO}_4^-$ . The data for the linear plot are also presented.



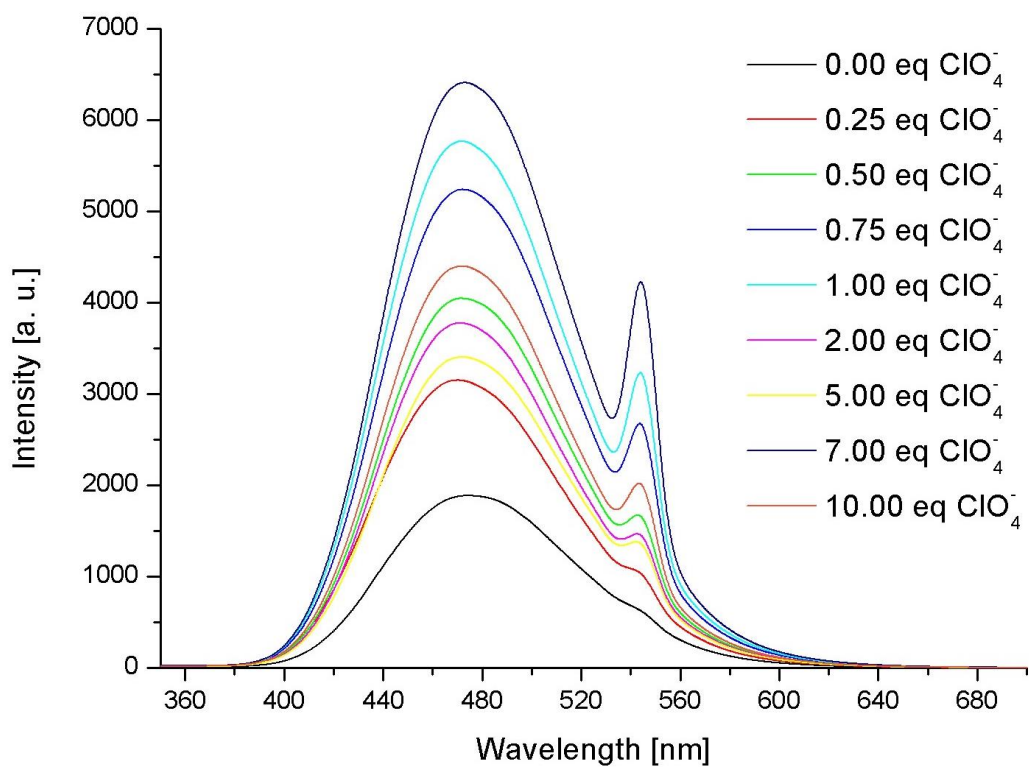

**Figure S 39** Emission spectra of **3** in the presence of various molar equivalents of  $\text{ClO}_4^-$  (DMSO/H<sub>2</sub>O 1:1 v/v,  $C_3 = 2 \cdot 10^{-5}$  M,  $\lambda_{\text{ex}} = 270$  nm).

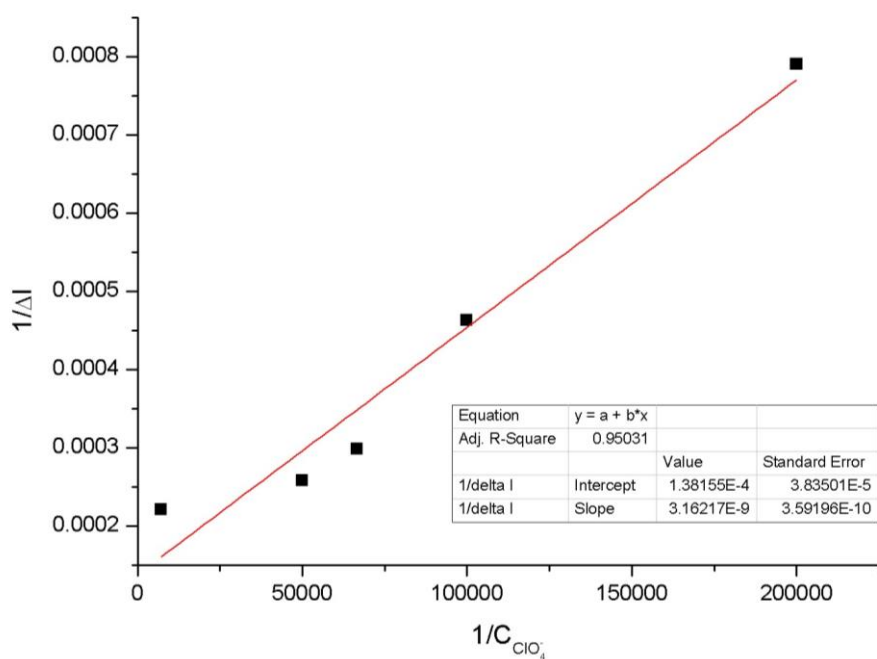

**Figure S 40** Benesi-Hildebrand plots regarding the interactions between **3** and  $\text{ClO}_4^-$ . The data for the linear plot are also presented.

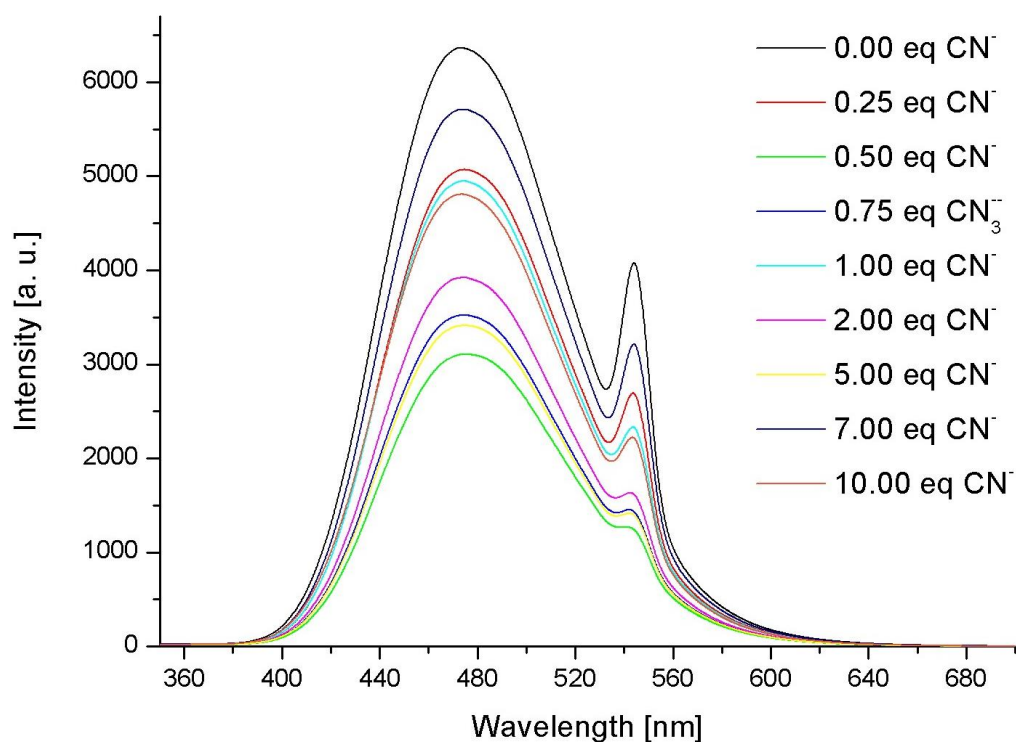

**Figure S 41** Emission spectra of **3** in the presence of various molar equivalents of  $\text{CN}^-$  (DMSO/ $\text{H}_2\text{O}$  1:1 v/v,  $C_3 = 2 \cdot 10^{-5}$  M,  $\lambda_{\text{ex}} = 270$  nm).

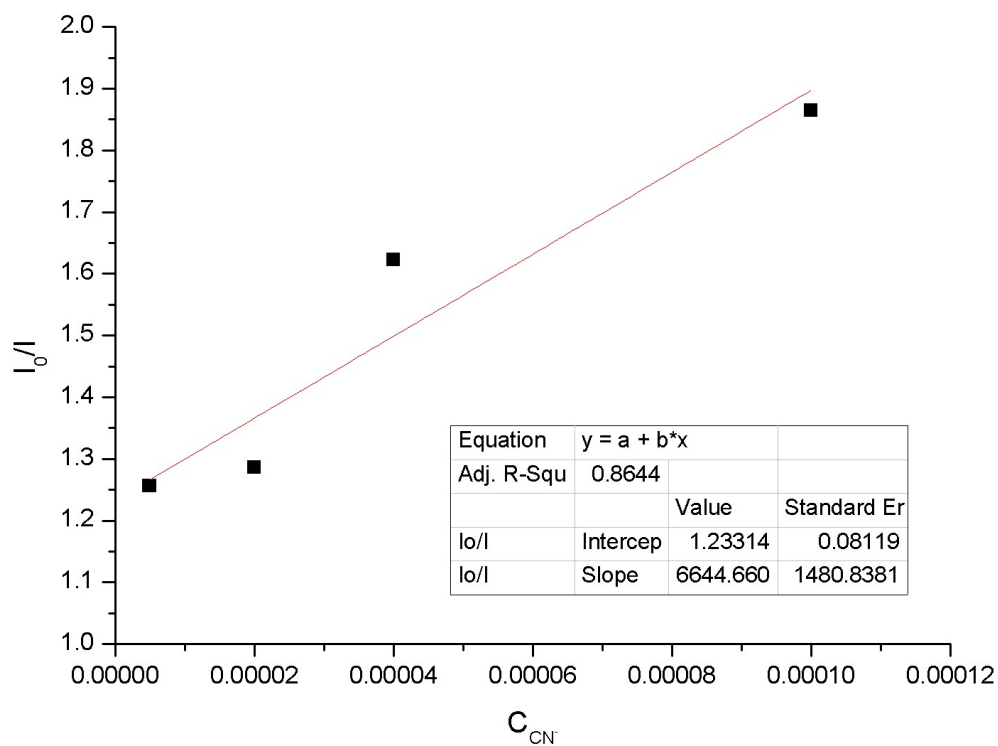

**Figure S 42** Stern-Volmer plot regarding the interactions between **3** and  $\text{CN}^-$ . The data for the linear plot are also presented.

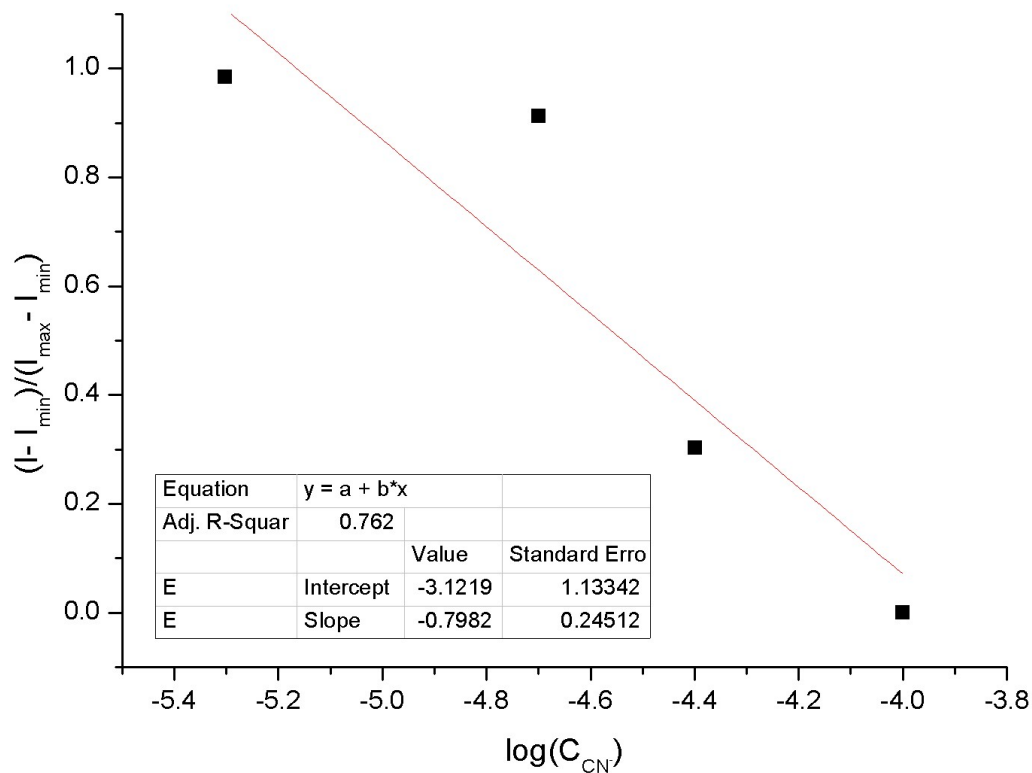

**Figure S 43** Plot for  $(I - I_{\min}) / (I_{\max} - I_{\min})$  versus  $\log(C_{\text{CN}^-})$  regarding the interactions between **3** and  $\text{CN}^-$ . The data for the linear plot are also presented.

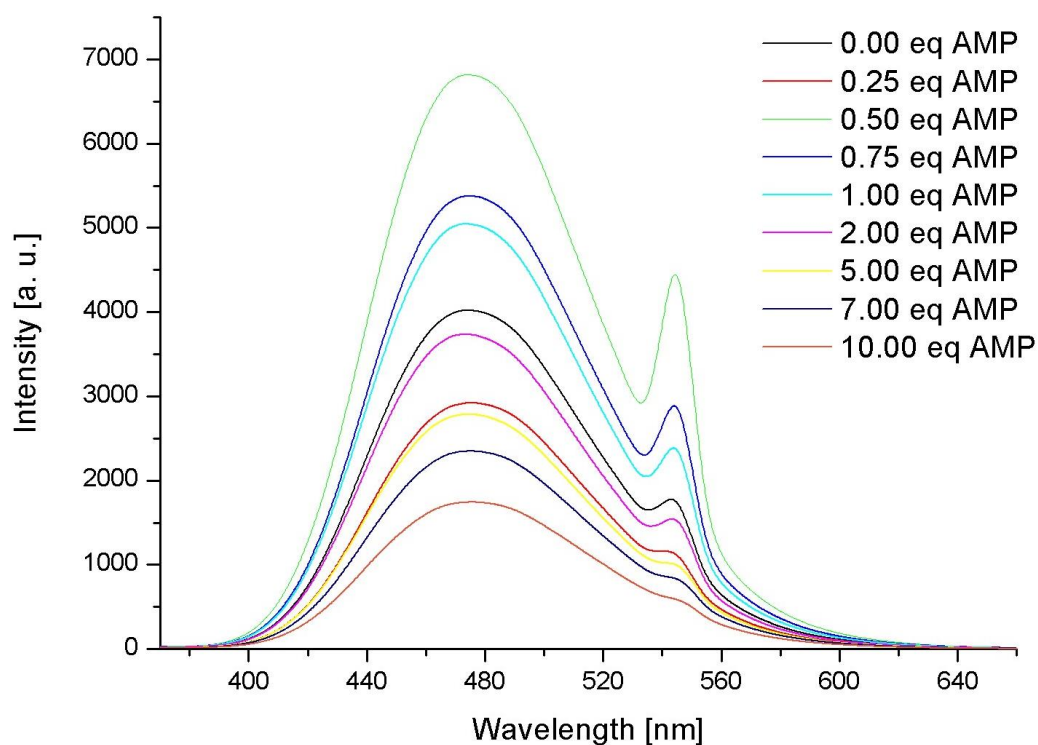

**Figure S 44** Emission spectra of **3** in the presence of various molar equivalents of **AMP** (DMSO/H<sub>2</sub>O 1:1 v/v,  $C_3 = 2 \cdot 10^{-5}$  M,  $\lambda_{\text{ex}} = 270$  nm).

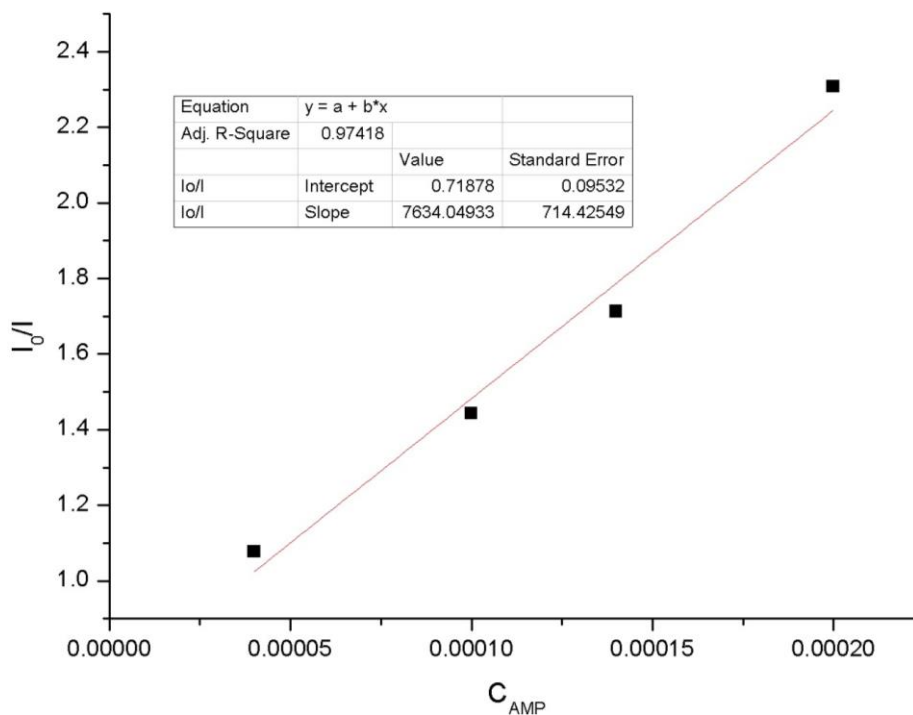

**Figure S 45** Stern-Volmer plot regarding the interactions between **3** and **AMP**. The data for the linear plot are also presented.

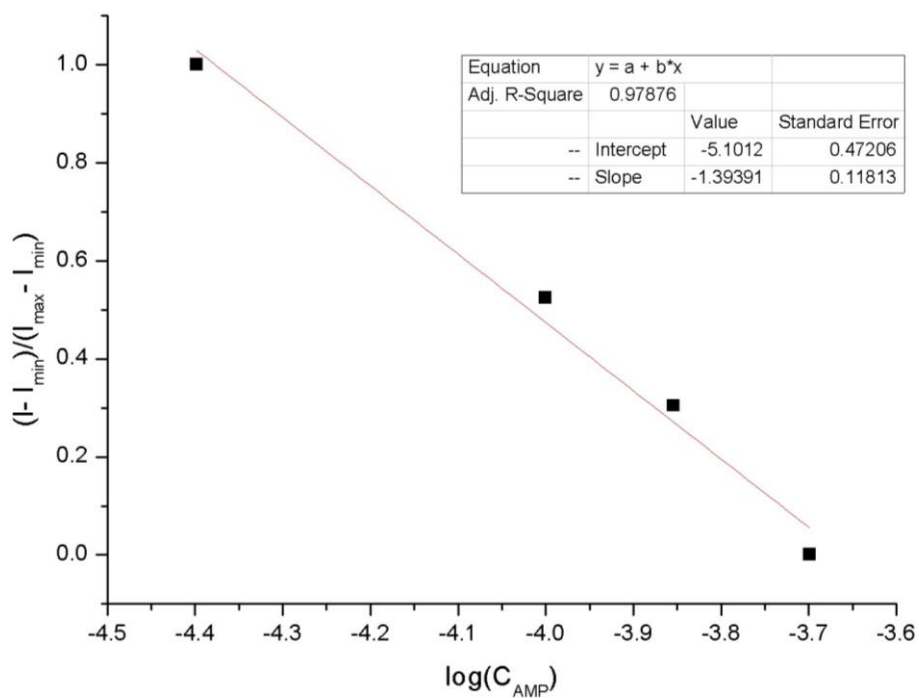

**Figure S 46** Plot for  $(I - I_{\min}) / (I_{\max} - I_{\min})$  versus  $\log(C_{\text{AMP}})$  of the interactions between **3** and **AMP**. The data for the linear plot are also presented.

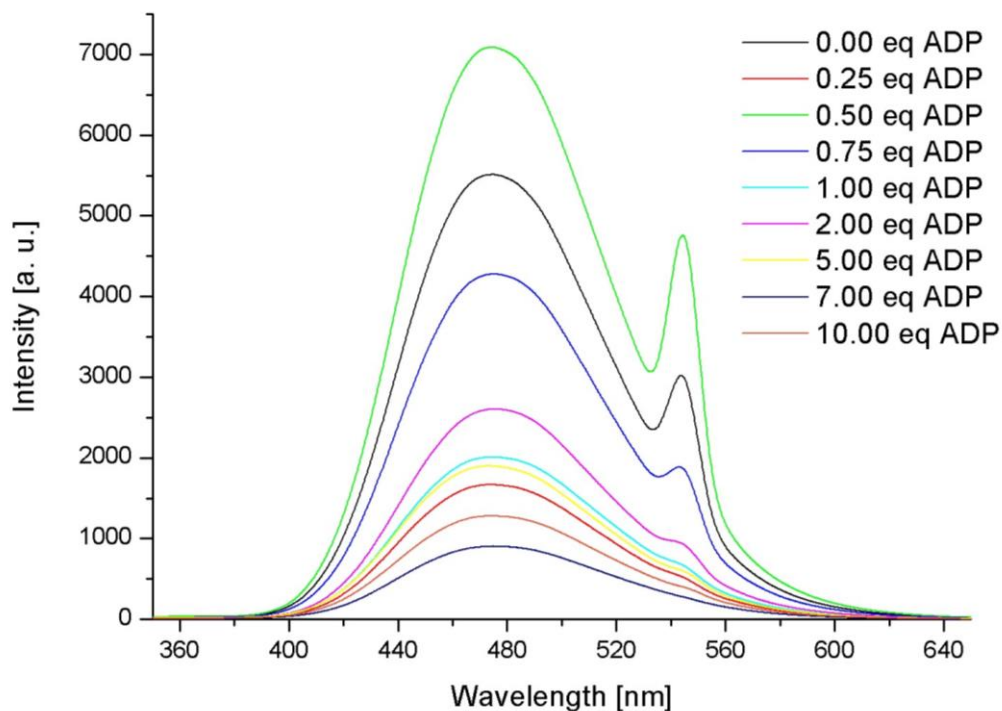

**Figure S 47** Emission spectra of **3** in the presence of various molar equivalents of **ADP** (DMSO/H<sub>2</sub>O 1:1 v/v, C<sub>3</sub> = 2·10<sup>-5</sup> M, λ<sub>ex</sub> = 270 nm).

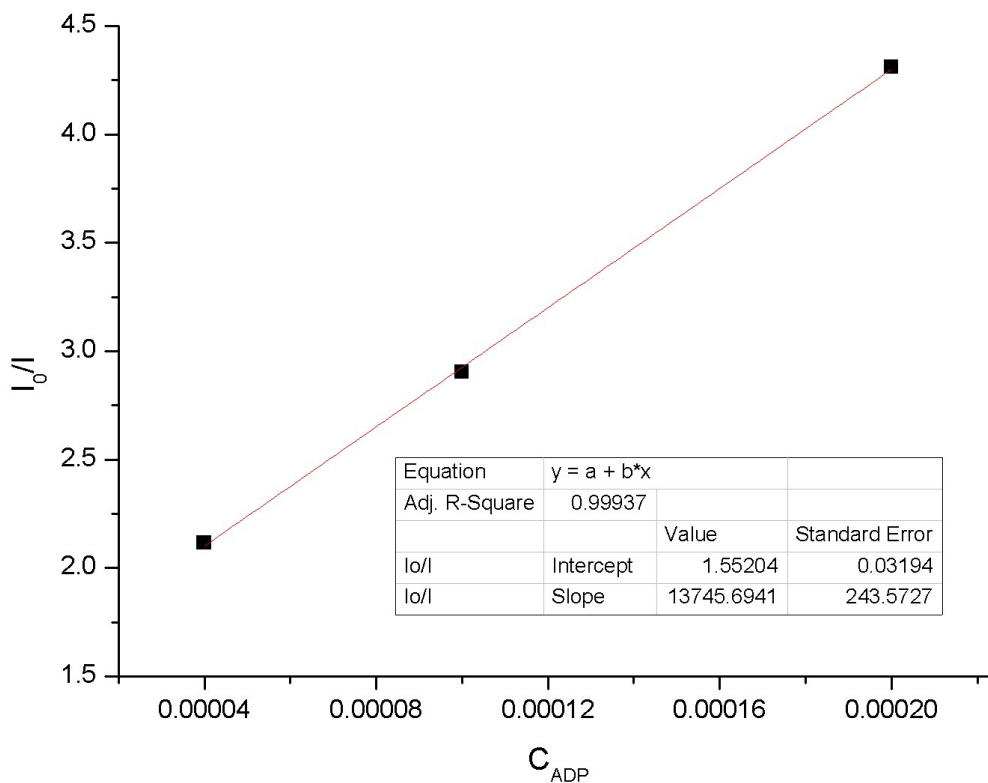

**Figure S 48** Stern-Volmer plot regarding the interactions between **3** and **ADP**. The data for the linear plot are also presented.

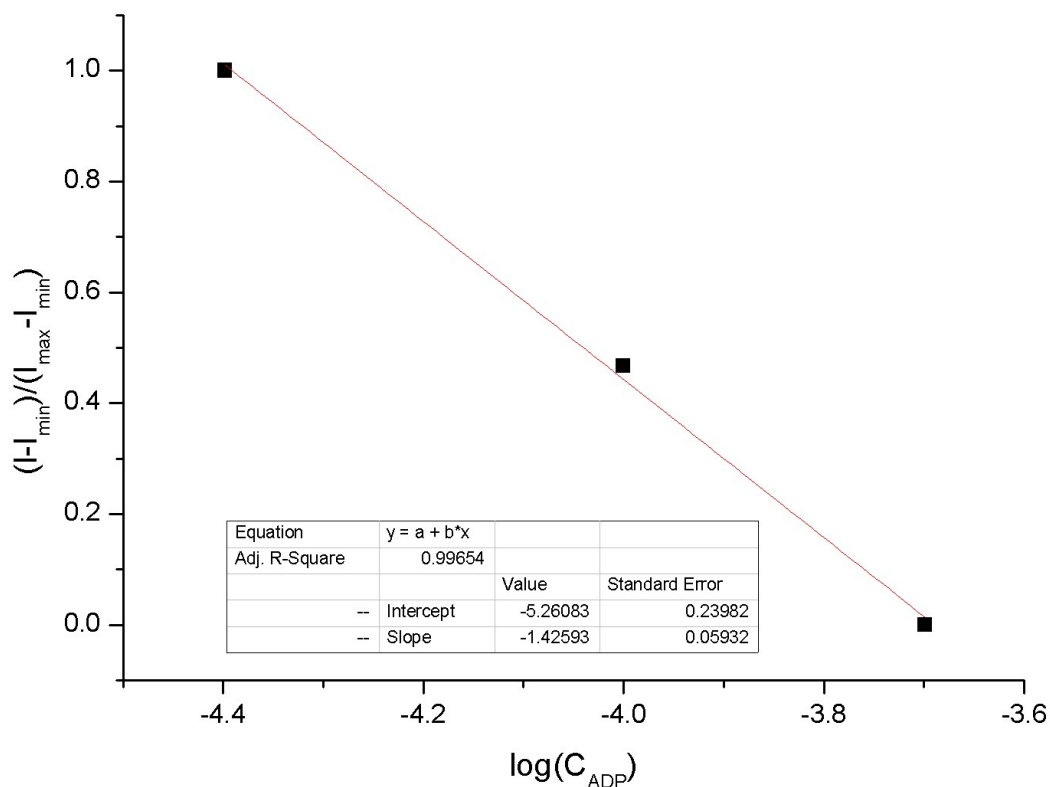

**Figure S 49** Plot for  $(I - I_{\min}) / (I_{\max} - I_{\min})$  versus  $\log(C_{\text{ADP}})$  of the interactions between **3** and **ADP**. The data for the linear plot are also presented.

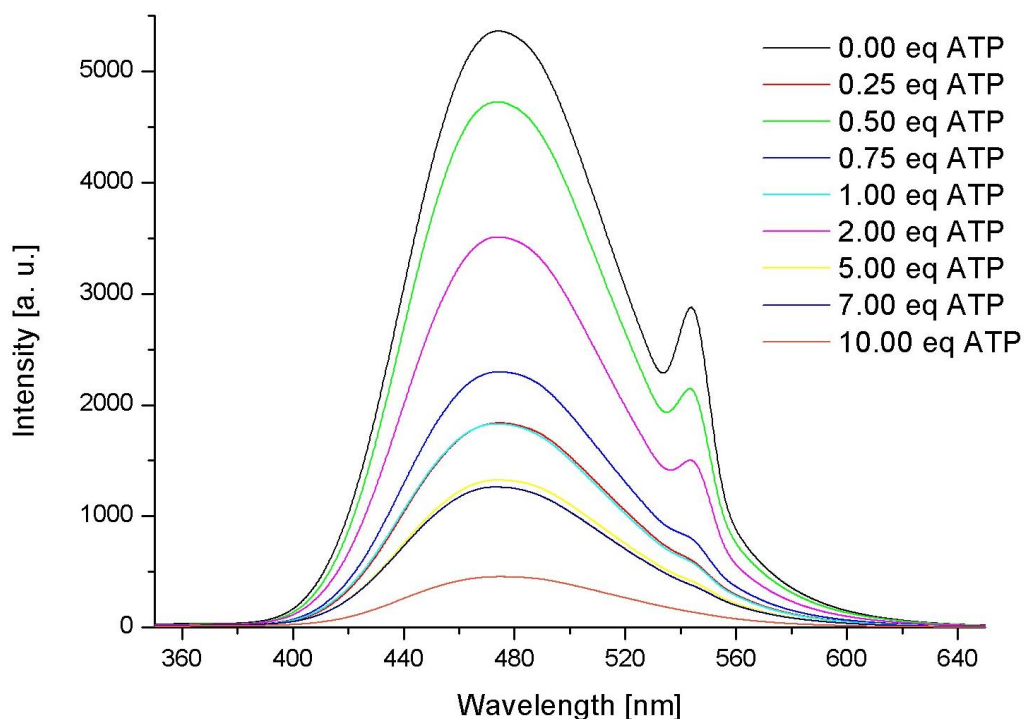

**Figure S 50** Emission spectra of **3** in the presence of various molar equivalents of **ATP** (DMSO/H<sub>2</sub>O 1:1 v/v,  $C_3 = 2 \cdot 10^{-5}$  M,  $\lambda_{\text{ex}} = 270$  nm).

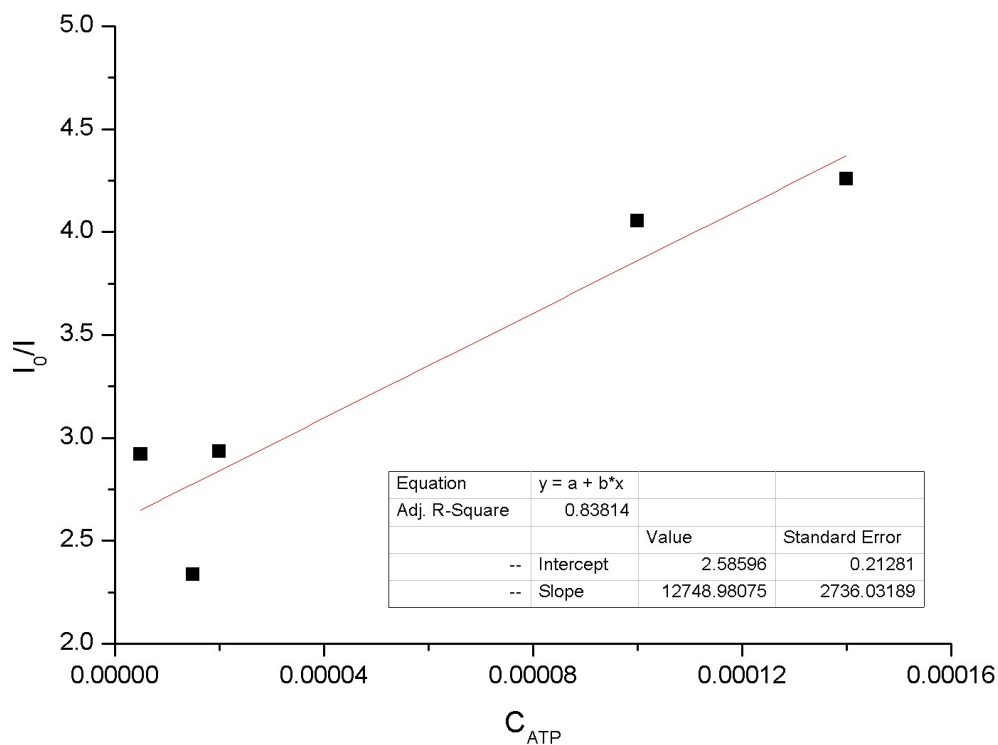

**Figure S 51** Stern-Volmer plot of the interactions between **3** and **ATP**. The data for the linear plot are also presented.

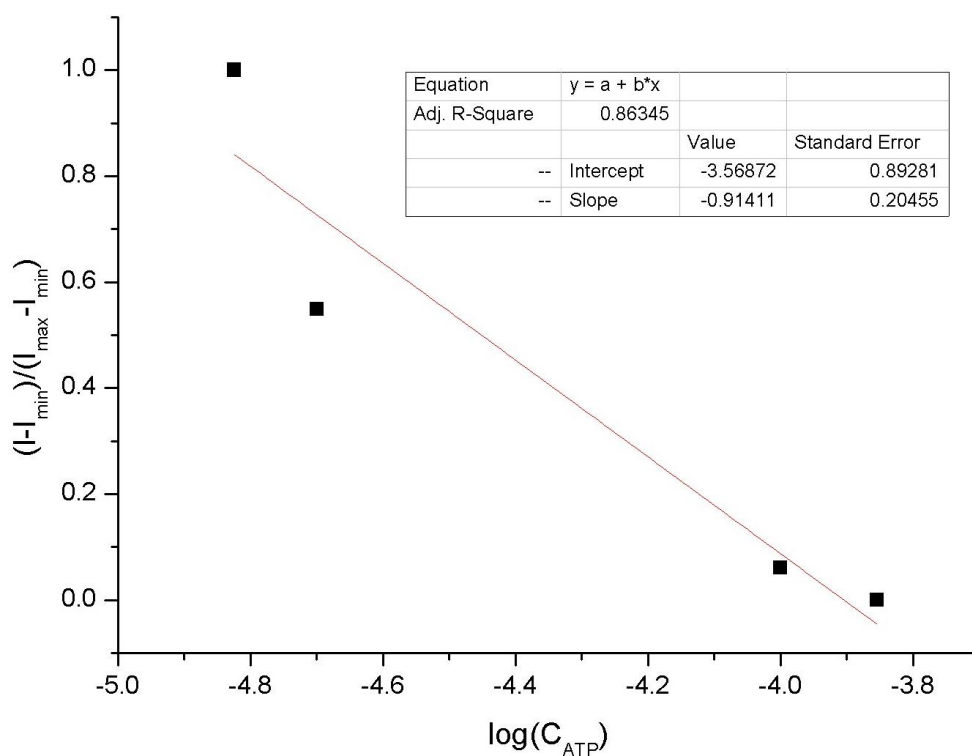

**Figure S 52** Plot for  $(I - I_{\min}) / (I_{\max} - I_{\min})$  versus  $\log(C_{\text{ATP}})$  of the interactions between **3** and **ATP**. The data for the linear plot are also presented.

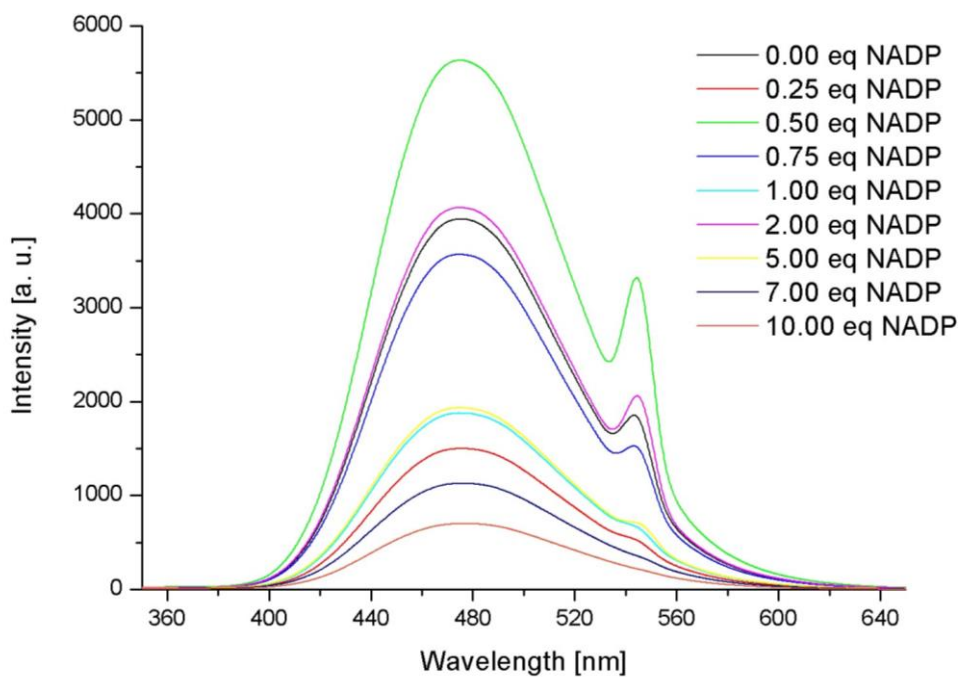

**Figure S 53** Emission spectra of **3** in the presence of various molar equivalents of **NADP** (DMSO/H<sub>2</sub>O 1:1 v/v, C<sub>3</sub> = 2·10<sup>-5</sup> M, λ<sub>ex</sub> = 270 nm).

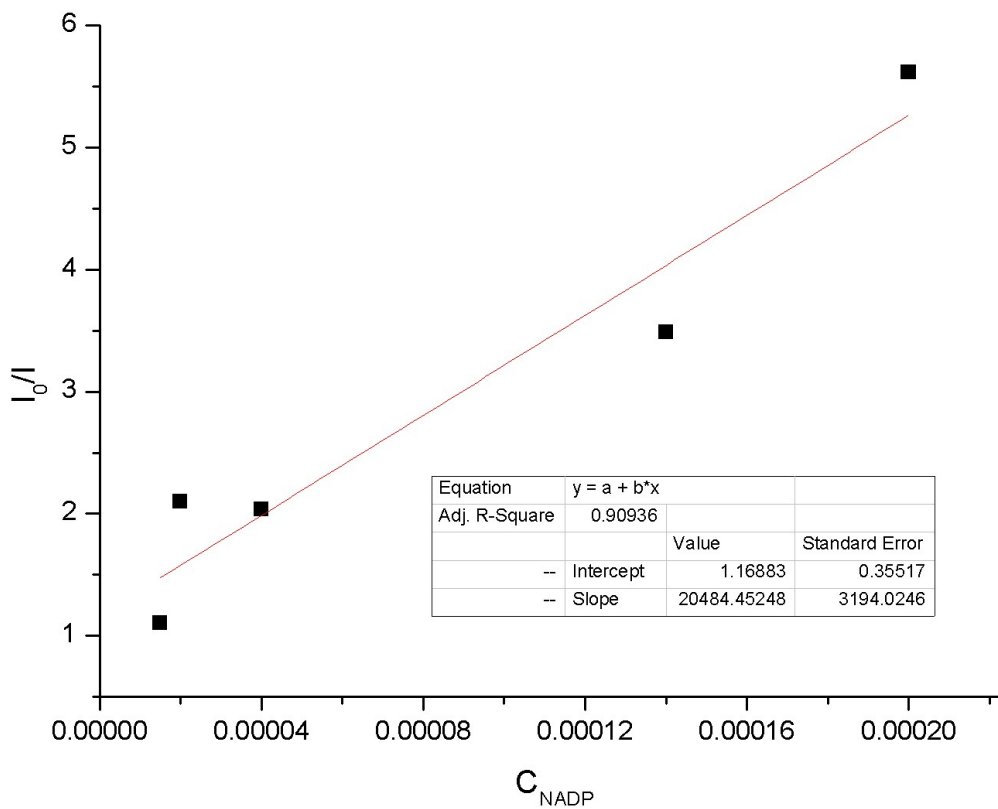

**Figure S 54** Stern-Volmer plot of the interactions between **3** and **NADP**. The data for the linear plot are also presented.



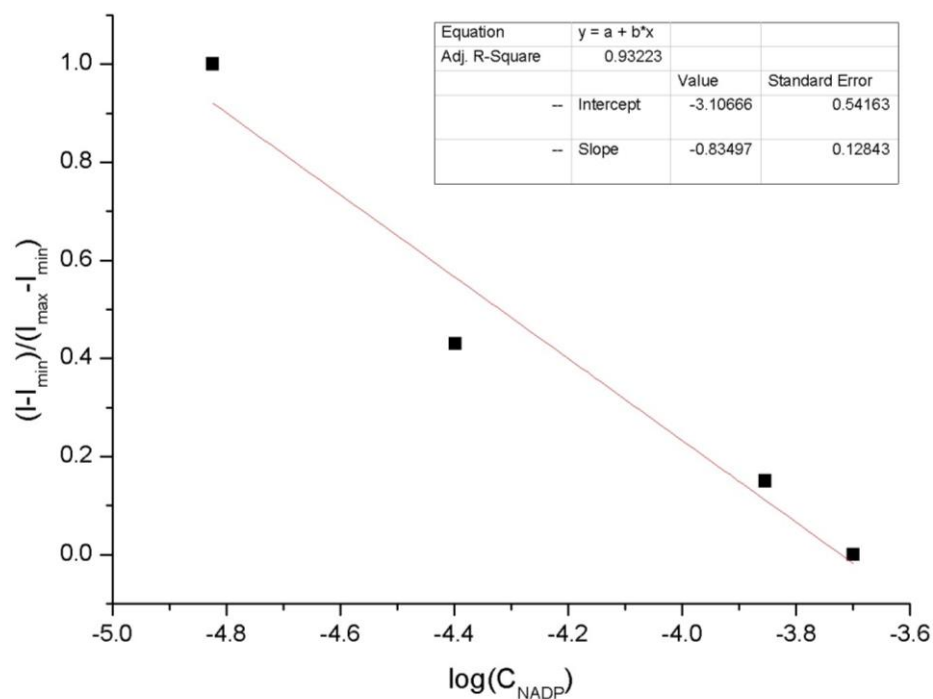

**Figure S 55** Plot for  $(I - I_{\min}) / (I_{\max} - I_{\min})$  versus  $\log(C_{\text{NADP}})$  regarding the interactions between **3** and **NADP**. The data for the linear plot are also presented.

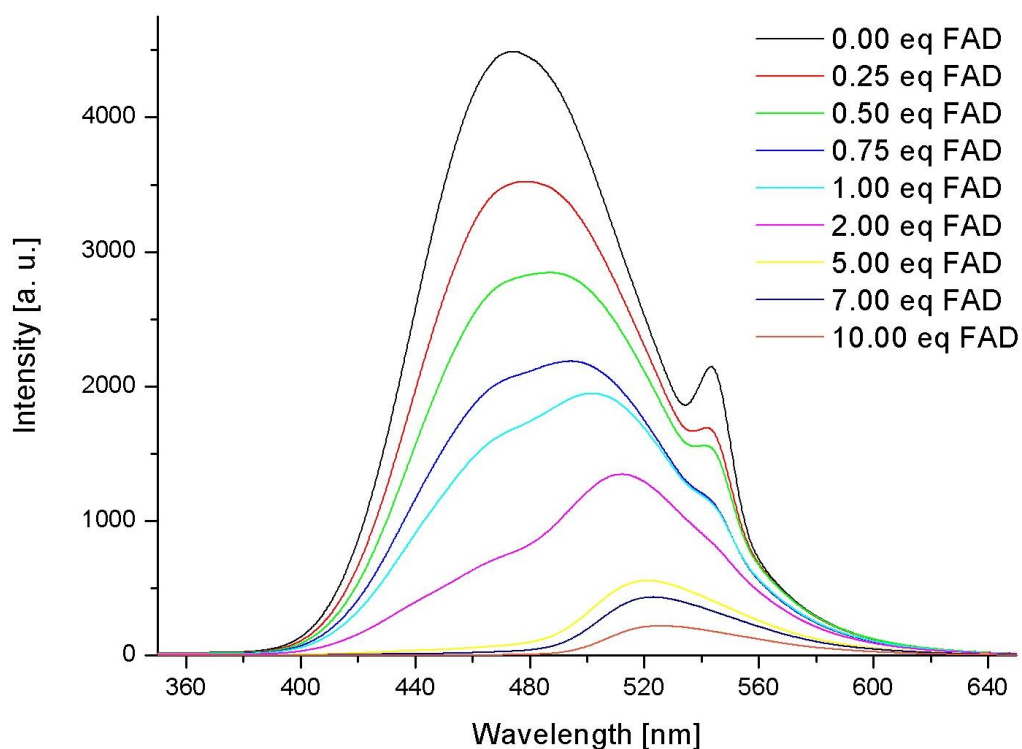

**Figure S 56** Emission spectra of **3** in the presence of various molar equivalents of **FAD** (DMSO/H<sub>2</sub>O 1:1 v/v, C<sub>3</sub> = 2 · 10<sup>-5</sup> M, λ<sub>ex</sub> = 270 nm).

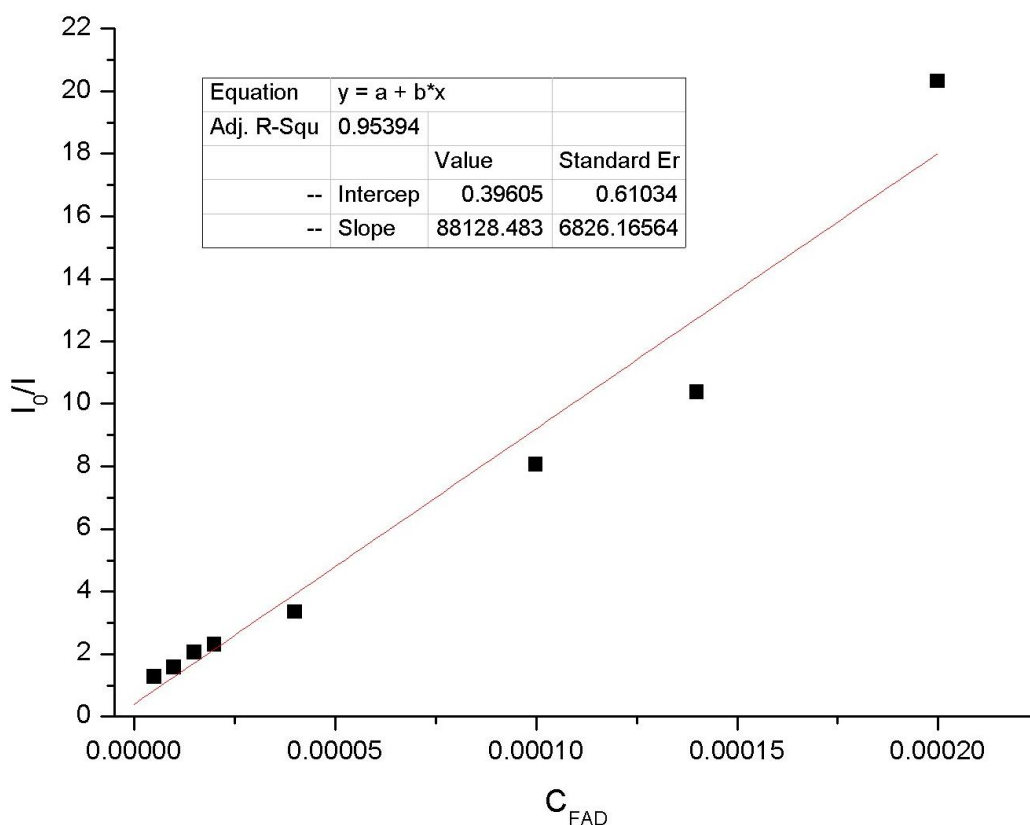

**Figure S 57** Stern-Volmer plot of the interactions between **3** and **FAD**. The data for the linear plot are also presented.

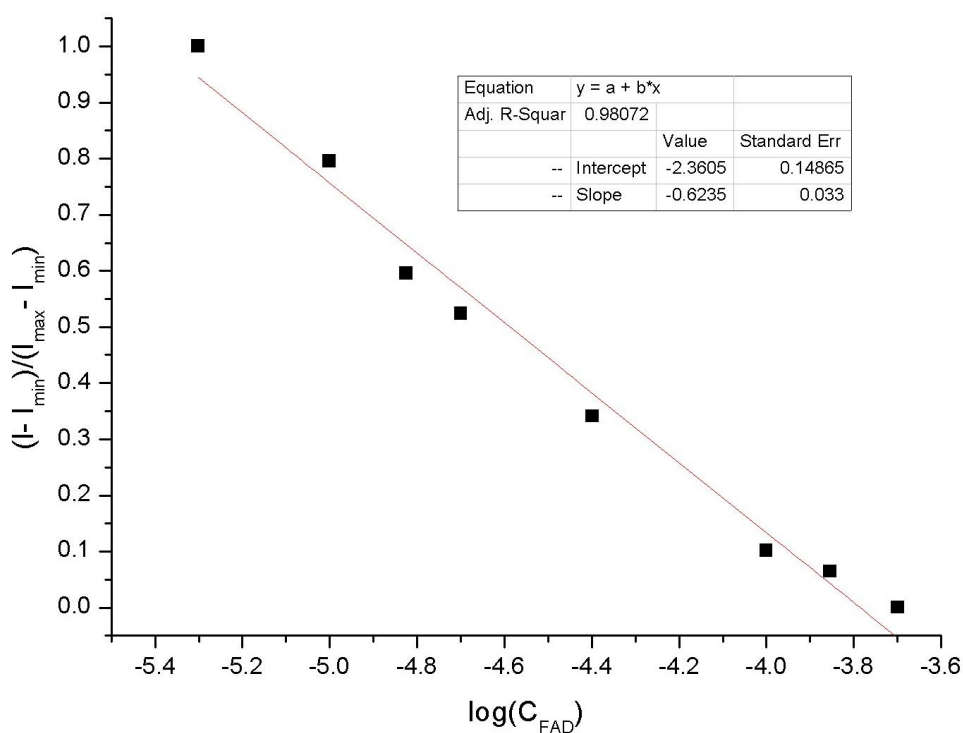

**Figure S 58** Plot for  $(-I_{\min})/(I_{\max}-I_{\min})$  versus  $\log(C_{\text{AMP}})$  of the interactions between **3** and **NADP**. The data for the linear plot are also presented.

## S6. DLS measurements

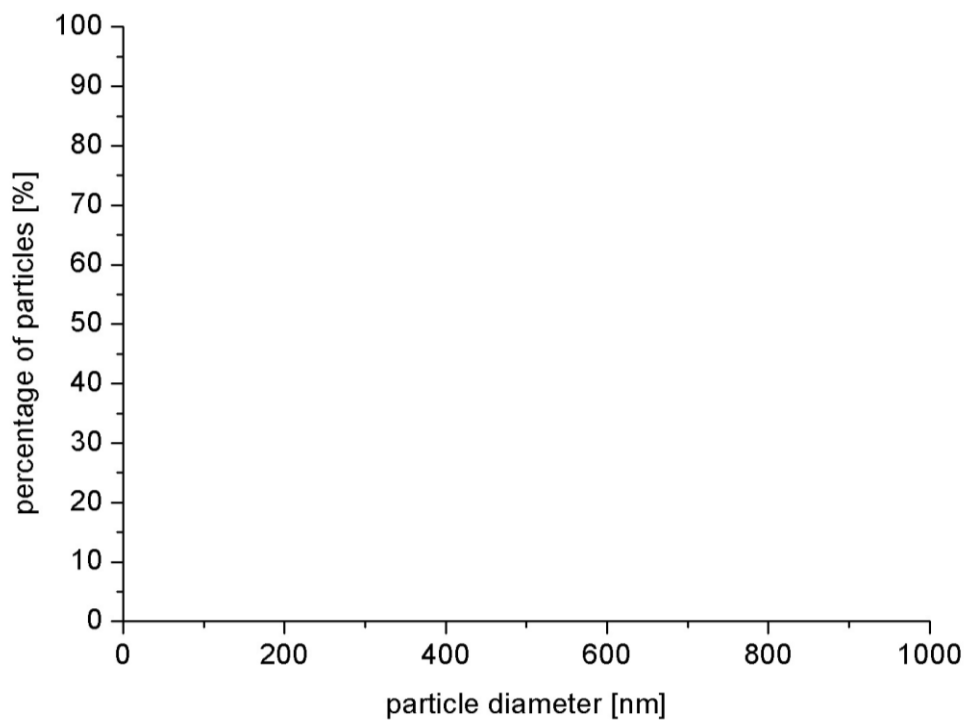

**Figure S 59** Size distribution pattern of **3** in DMSO

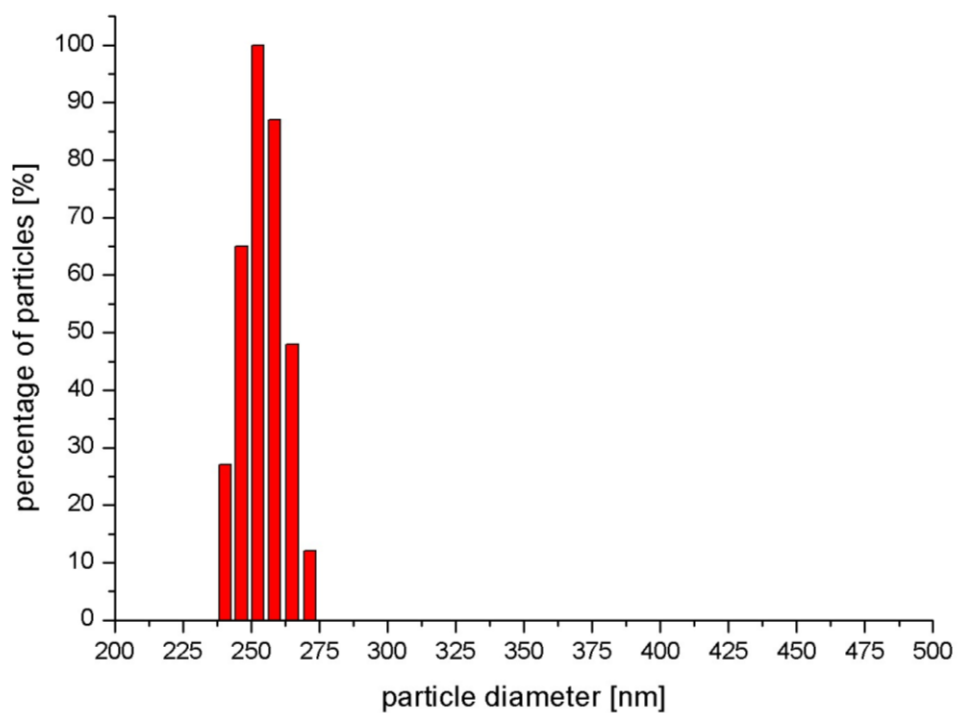

**Figure S 60** Size distribution pattern of **3** in DMSO/H<sub>2</sub>O = 1/1 v/v system

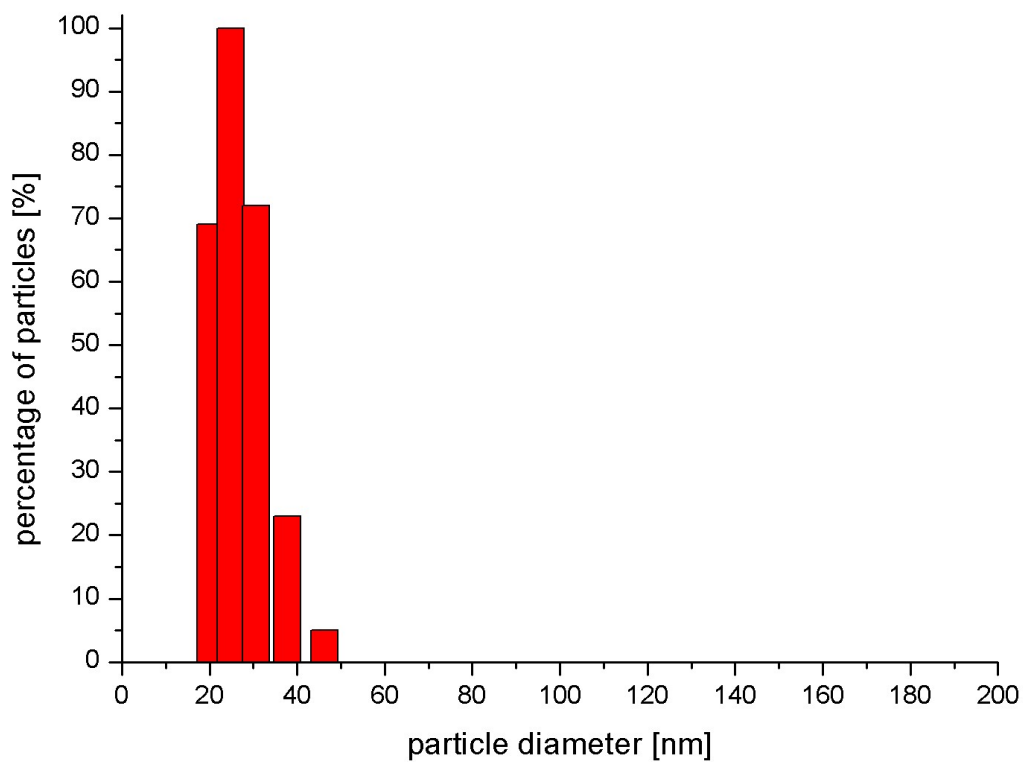

**Figure S 61** Size distribution pattern of **3** in DMSO/H<sub>2</sub>O = 9/1 v/v system

## S7 SEM images

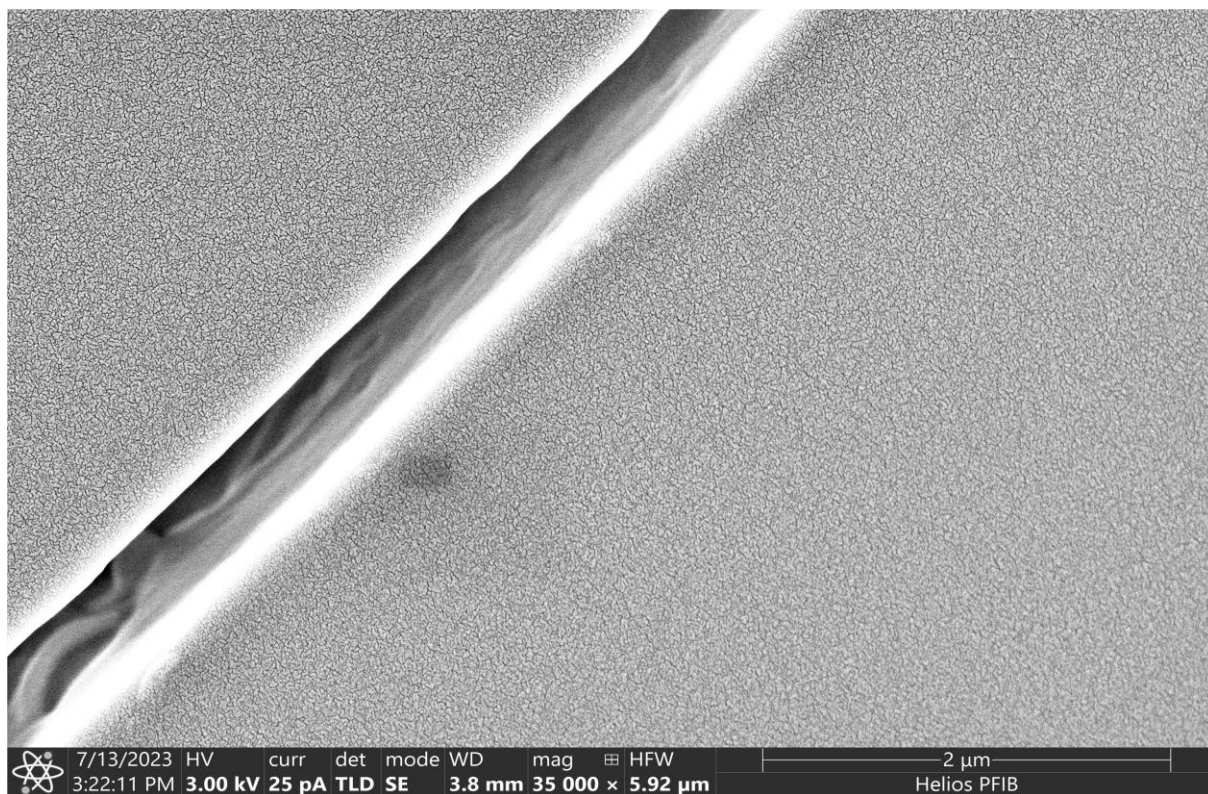

**Figure S 62** SEM image of solid **3** obtained after column chromatography

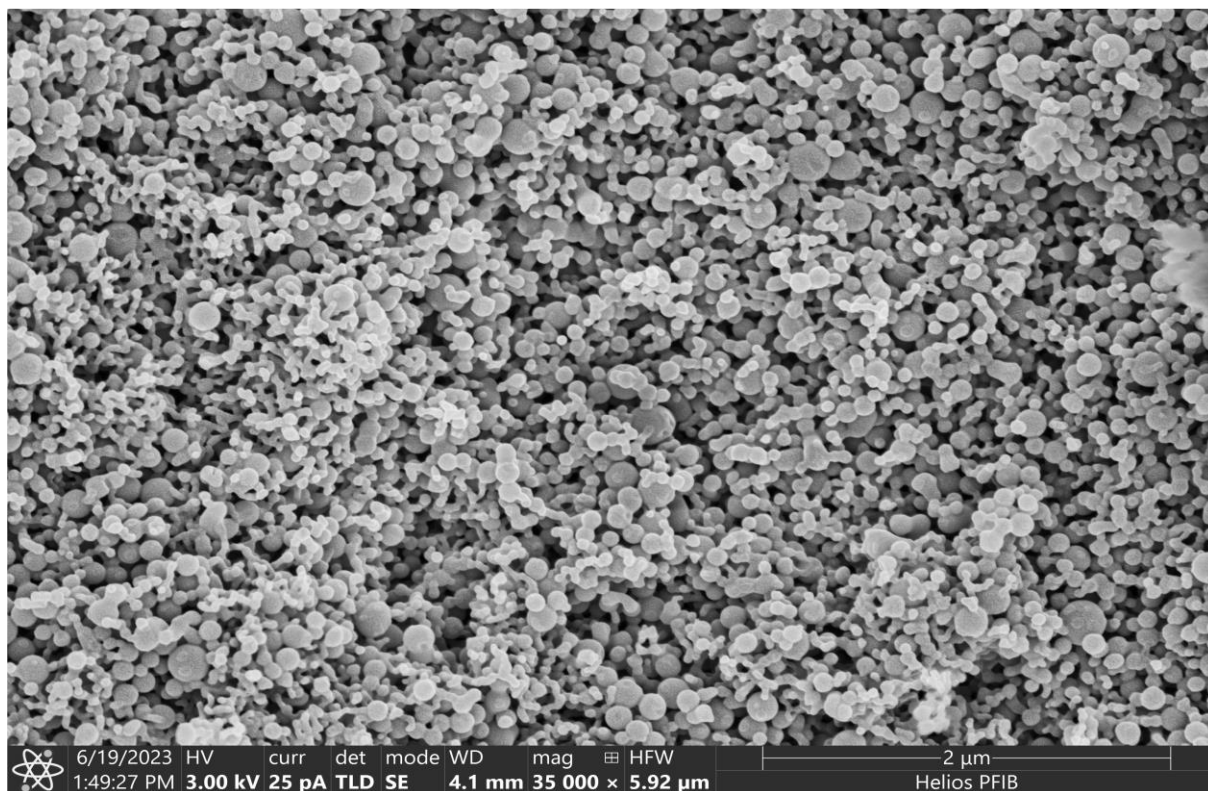

**Figure S 63** SEM image of dried aggregates of **3**

## S8 Supporting references

1. Brouwer, A. M. Standards for photoluminescence quantum yield measurements in solution (IUPAC Technical Report). *Pure Appl. Chem.* **83**, 2213–2228 (2011).
2. Würth, C., Grabolle, M., Pauli, J., Spieles, M. & Resch-Genger, U. Relative and absolute determination of fluorescence quantum yields of transparent samples. *Nat. Protoc.* **8**, 1535–1550 (2013).
3. Brouwer, A. M. Standards for photoluminescence quantum yield measurements in solution (IUPAC Technical Report). *Pure Appl. Chem.* **83**, 2213–2228 (2011).
4. Benesi, H. A. & Hildebrand, J. H. A Spectrophotometric Investigation of the Interaction of Iodine with Aromatic Hydrocarbons. *J. Am. Chem. Soc.* **71**, 2703–2707 (1949).
5. Goswami, S. *et al.* A highly selective and sensitive probe for colorimetric and fluorogenic detection of Cd<sup>2+</sup> in aqueous media. *The Analyst* **138**, 1903 (2013).
6. Wang, D. *et al.* Efficient Gene Delivery Based on Guanidyl-Nucleic Acid Molecular Interactions. *Adv. Funct. Mater.* **30**, 2004783 (2020).
